# Supplementary material for: Micro RNA Transcriptome Profile in Canine Oral Melanoma
Source: Preprints.org preprint supplement (doi:10.20944/preprints201908.0286.v1), 2019-08-27
Supplement: Supplementary file 1 [file supplementary]

# MiRNA profile in canine oral melanoma

Md. Mahfuzur Rahman, Yu-Chang Lai, Norio Ushio, Al Asmaul Husna, Hui-wen Chen, Yukiko Tanaka, Noriaki Miyoshi, Takayuki Nakagawa, Ryuji Fukushima, Naoki Miura

(a)

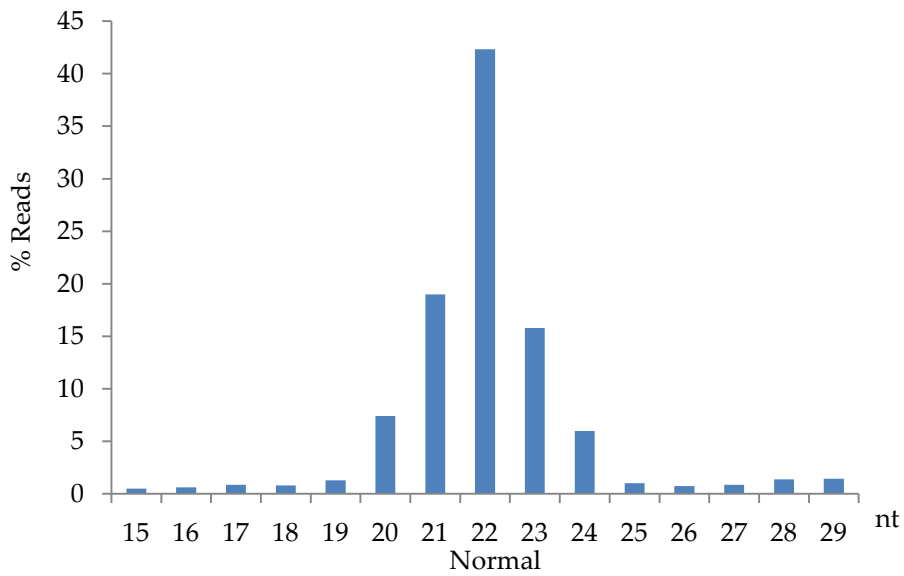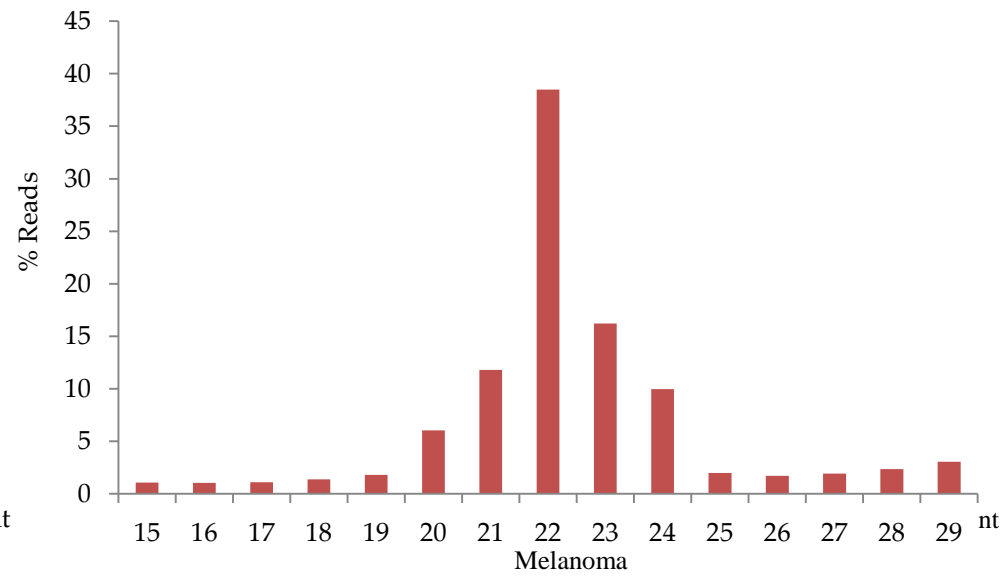

(b)

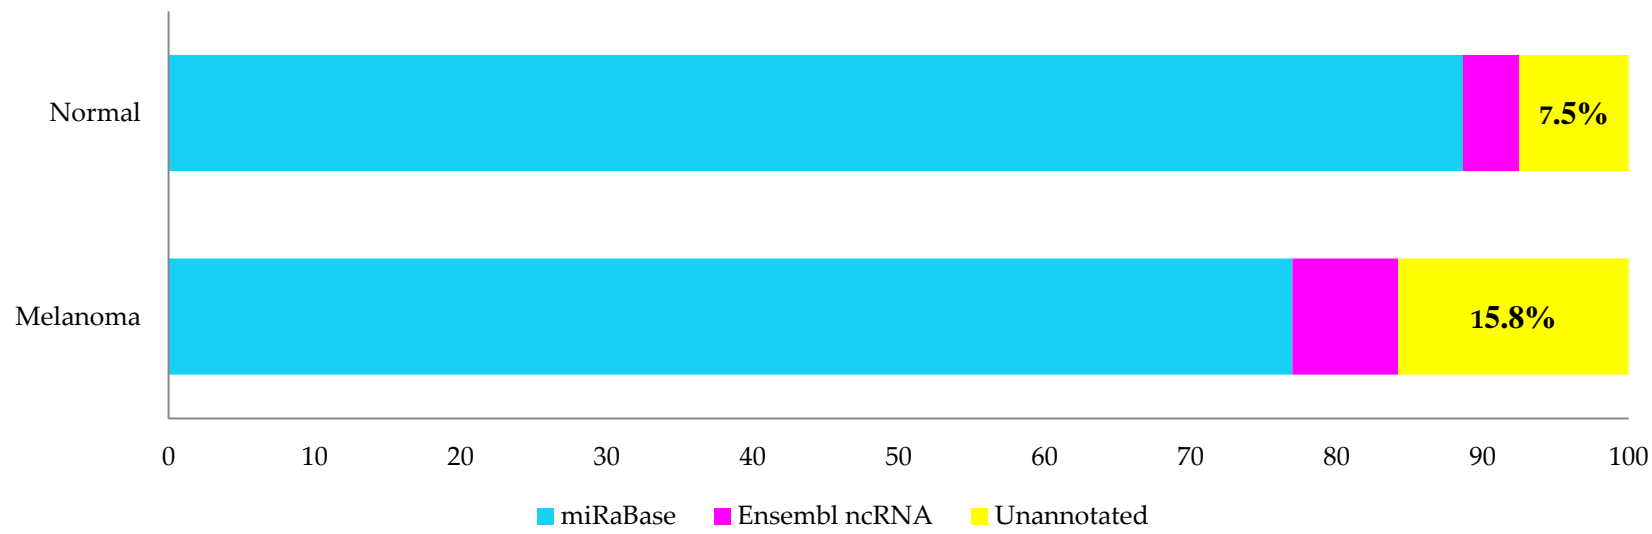

(c)

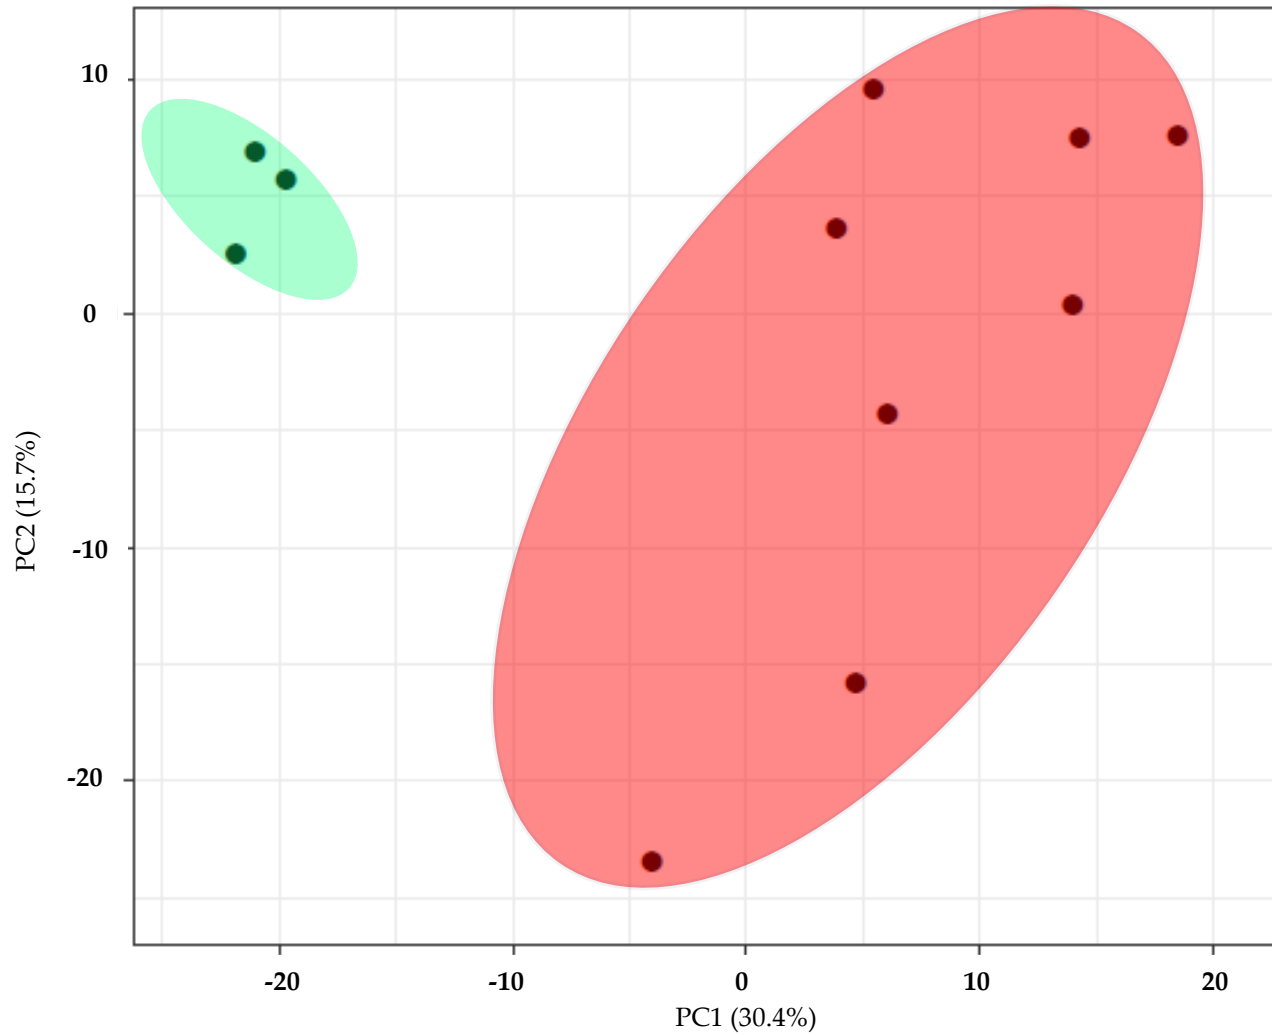

**Figure S1.** Profile of small RNA reads in canine oral melanoma: **(a)** Length distribution of clean reads in the normal and melanoma libraries; **(b)** Percentages of the clean reads annotated by the miRbase and Ensembl non-coding RNA databases; **(c)** Principal component analysis (PCA) of normal (green) and melanoma (pink) samples. The miRNAs read counts were normalized and transformed before PCA.

(a)

Dog PAX9 ENST00000361487.6 3' UTR length: 4013

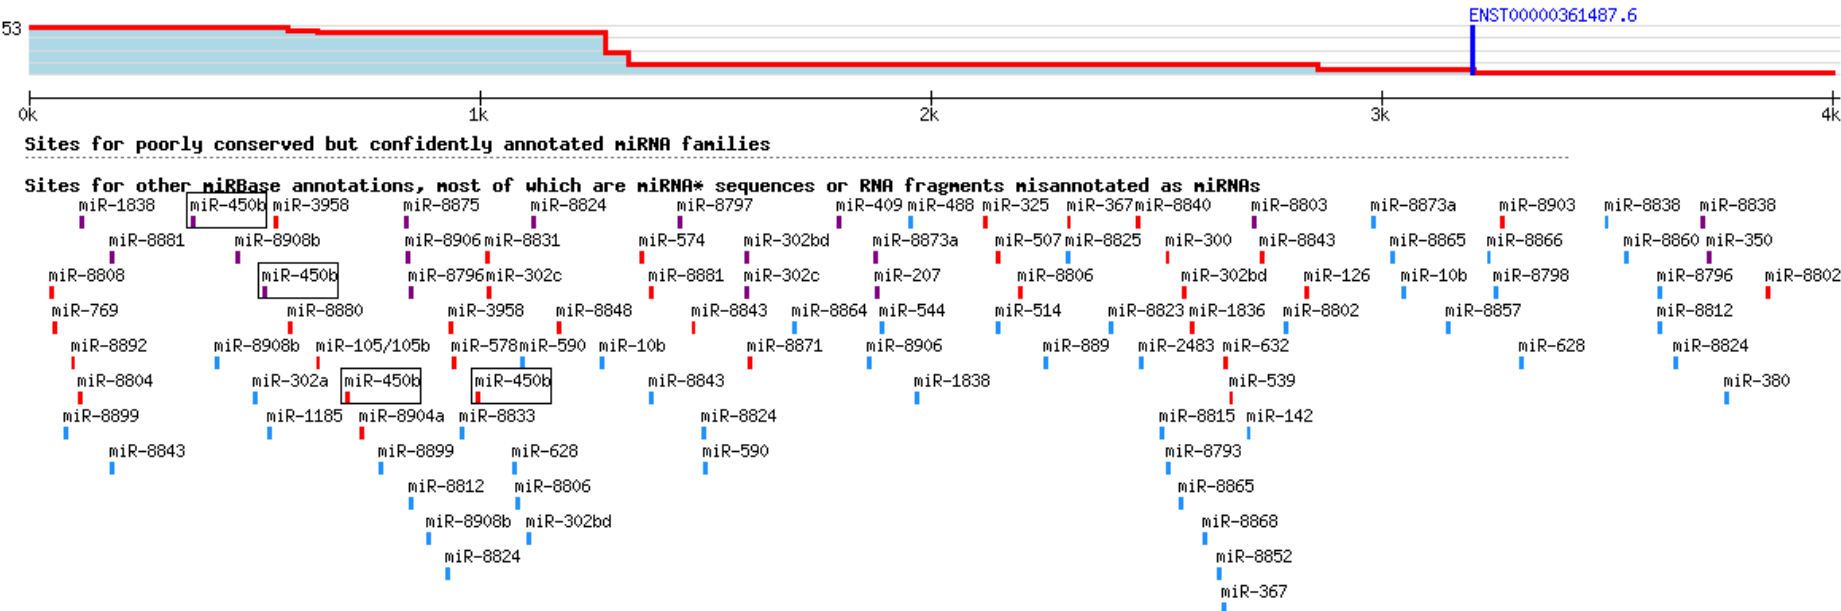

|                                                   | Predicted consequential pairing of target region (top) and miRNA (bottom) | Site type | Context++ score | Context++ score percentile | Weighted context++ score | Conserved branch length | P <sub>CT</sub> |
|---------------------------------------------------|---------------------------------------------------------------------------|-----------|-----------------|----------------------------|--------------------------|-------------------------|-----------------|
| Position 380-387 of PAX9 3' UTR<br>cfa-miR-450b   | 5' ...GCAAUUGUUGAGAUUUUGCAAAA...<br>3' UAAGUCCUUGUAUAACGUUUU              | 8mer      | -0.22           | 96                         | -0.22                    | 0.153                   | N/A             |
| Position 544-551 of PAX9 3' UTR<br>cfa-miR-450b   | 5' ...AGAUGACCUAUUUUGUUGCAAAA...<br>3' UAAGUCCUUGUAUAACGUUUU              | 8mer      | -0.19           | 94                         | -0.19                    | 0                       | N/A             |
| Position 735-741 of PAX9 3' UTR<br>cfa-miR-450b   | 5' ...UUUUUUUUUUUUUUUGCAAAG...<br>3' UAAGUCCUUGUAUAACGUUUU                | 7mer-m8   | -0.03           | 50                         | -0.03                    | 0.233                   | N/A             |
| Position 1033-1039 of PAX9 3' UTR<br>cfa-miR-450b | 5' ...UUAAUGUGAAACGCUUUGCAAAG...<br>3' UAAGUCCUUGUAU-AACGUUUU             | 7mer-m8   | -0.08           | 78                         | -0.07                    | 0.153                   | N/A             |

.....350.....360.....370.....380.....390.....400.....410.....420.....430.....440.....

Dog JCAACCUGAACUUUUUGAAACGUGCAA---UUGUU---GAGA-UUUUGC-AAAAUC---AAUAAAGGAAACUACAU-----AUAGAAAA-----AAAA---AGUUUAUGCUAUACCCCUUAUAUCAAUAA-

Human JCAACCUGAACUUUUUGAAAUUGUGCAA---UUGUU---GAGA-UUUUGC-AAAAUC---AAUAAAGGAAAUACUU-----AUAG-----AAAA---AAUUUAUGCUACACCCCUUAUAUCAAUAAU-

(b)

Dog ACVR2A ENST00000241416.7 3' UTR length: 3560

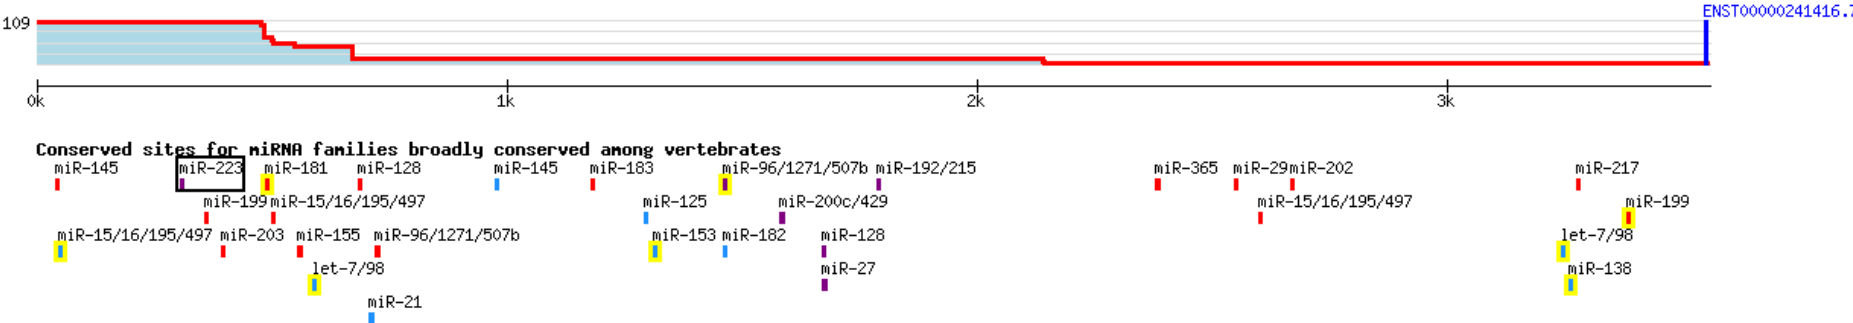

|                                   | Predicted consequential pairing of target region (top) and miRNA (bottom) | Site type | Context++ score | Context++ score percentile | Weighted context++ score | Conserved branch length | P <sub>CT</sub> |
|-----------------------------------|---------------------------------------------------------------------------|-----------|-----------------|----------------------------|--------------------------|-------------------------|-----------------|
| Position 305-312 of ACVR2A 3' UTR | 5' ...AAUCAAGUGUUUGAA-AACUGACA...                                         | 8mer      | -0.46           | 98                         | -0.46                    | 3.283                   | 0.29            |
| cfa-miR-223                       | 3' CCCCAGAAACUGUUUGACUGU                                                  |           |                 |                            |                          |                         |                 |

260.....270.....280.....290.....300.....310.....320.....330.....340.....350.....360.....

Dog ICUCCAAAU--C--AAGGAUC-UUUUGGACCU--GGCU-AAUCAAGUGU-UUG--AAAACUGACAUCAGAUUUC-----UAAUGUCUGUCGG--AA--GACACUAAUUC-UUAAAUGAACUACUGCUA----

Human ICUCCAAAU--C--AAGGAUC-UUUUGGACCU--GGCU-AAUGGAGUGU-UUG--AAAACUGACAUCAGAUUUC-----UAAUGUCUGUCAG--AA--GACACUAAUUC-UUAAAUGAACUACUGCU----

(c)

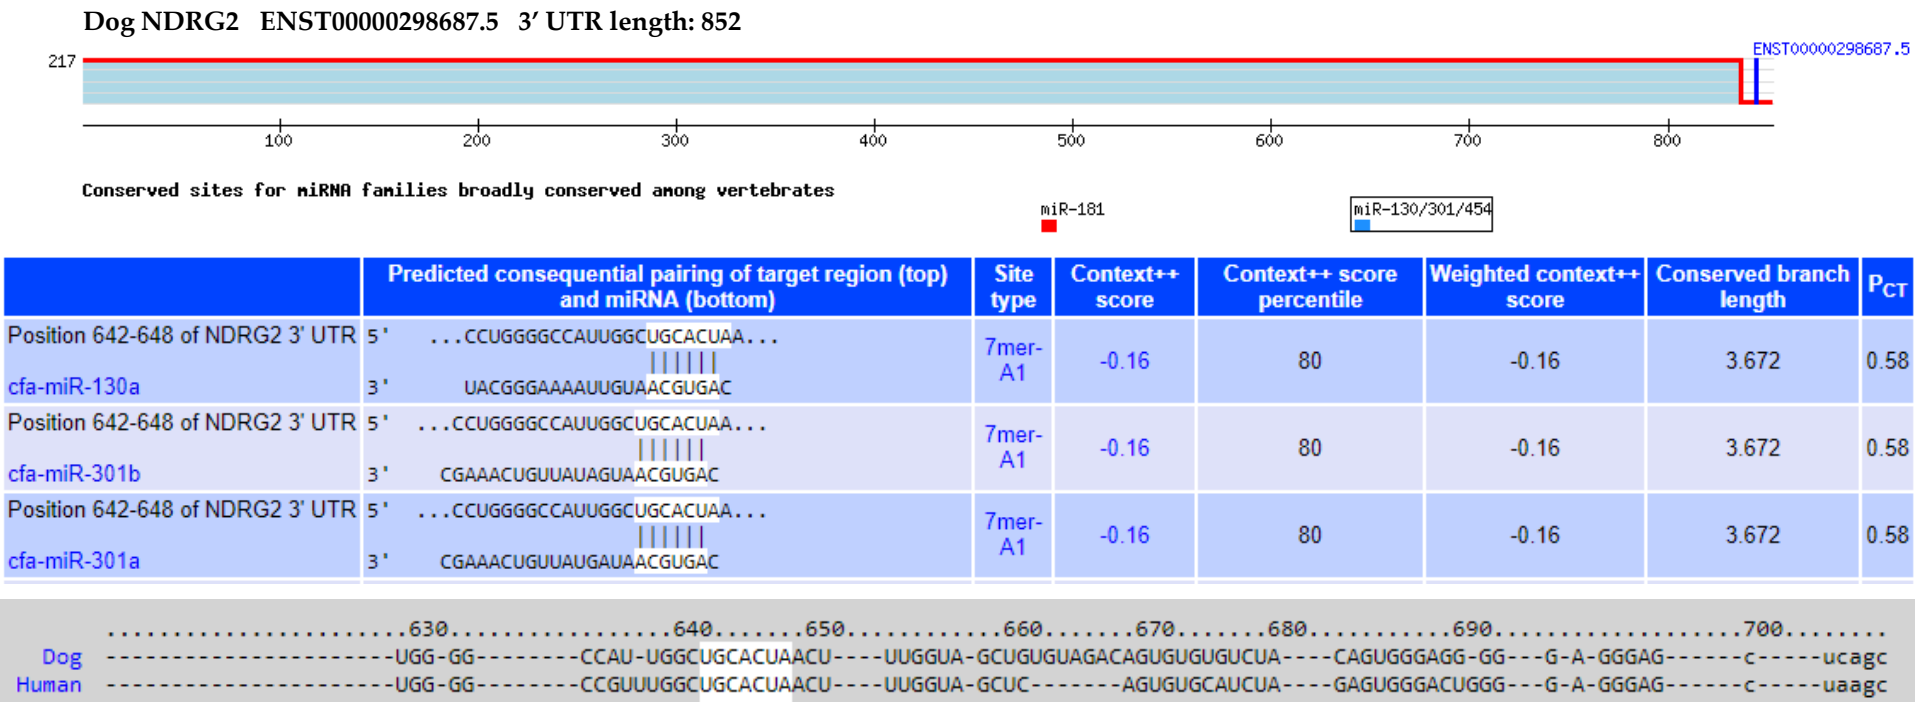

**Figure S2.** Predicted conserved target binding site of miR-450b-PAX9, miR-223-ACVR2A and miR-301a-NDRG2 from TargetScan: **(a-c)**. Predicted binding sites of respective miRNA-mRNA are conserved between human and dog.
