# Supplementary material for: Micro RNA Transcriptome Profile in Canine Oral Melanoma
Source: Preprints.org preprint supplement (doi:10.20944/preprints201908.0286.v1), 2019-08-27
Supplement: Supplementary file 1 [file supplementary]

## Sheet: Table S3a
Table S3a. The genes targeted by downregulated miRNAs.
OFFICIAL_GENE_SYMBOL	Name
From	Gene Name
RBPMS2	RNA binding protein with multiple splicing 2(RBPMS2)
MEF2A	myocyte enhancer factor 2A(MEF2A)
OSMR	oncostatin M receptor(OSMR)
SCN3B	sodium voltage-gated channel beta subunit 3(SCN3B)
SYNCRIP	synaptotagmin binding cytoplasmic RNA interacting protein(SYNCRIP)
RORA	RAR related orphan receptor A(RORA)
AMOTL1	angiomotin like 1(AMOTL1)
AMOTL2	angiomotin like 2(AMOTL2)
SLC52A3	solute carrier family 52 member 3(SLC52A3)
DIRAS1	DIRAS family GTPase 1(DIRAS1)
ZNF777	zinc finger protein 777(ZNF777)
USP53	ubiquitin specific peptidase 53(USP53)
MAP3K4	mitogen-activated protein kinase kinase kinase 4(MAP3K4)
FOXF1	forkhead box F1(FOXF1)
BTBD3	BTB domain containing 3(BTBD3)
VPS4B	vacuolar protein sorting 4 homolog B (S. cerevisiae)(VPS4B)
DHX33	DEAH-box helicase 33(DHX33)
DHX36	DEAH-box helicase 36(DHX36)
PTBP3	polypyrimidine tract binding protein 3(PTBP3)
OGT	O-linked N-acetylglucosamine (GlcNAc) transferase(OGT)
DHX35	DEAH-box helicase 35(DHX35)
RAB27B	RAB27B, member RAS oncogene family(RAB27B)
LRRC7	leucine rich repeat containing 7(LRRC7)
IKBKAP	inhibitor of kappa light polypeptide gene enhancer in B-cells, kinase complex-associated protein(IKBKAP)
TMEFF2	transmembrane protein with EGF like and two follistatin like domains 2(TMEFF2)
GATM	glycine amidinotransferase(GATM)
SCN2B	sodium voltage-gated channel beta subunit 2(SCN2B)
LRRC2	leucine rich repeat containing 2(LRRC2)
PTBP1	polypyrimidine tract binding protein 1(PTBP1)
SIPA1L2	signal induced proliferation associated 1 like 2(SIPA1L2)
EOMES	eomesodermin(EOMES)
BSN	bassoon presynaptic cytomatrix protein(BSN)
GEM	GTP binding protein overexpressed in skeletal muscle(GEM)
SCYL3	SCY1 like pseudokinase 3(SCYL3)
BTBD9	BTB domain containing 9(BTBD9)
MARK1	microtubule affinity regulating kinase 1(MARK1)
THY1	Thy-1 cell surface antigen(THY1)
MARK2	microtubule affinity regulating kinase 2(MARK2)
DCAF7	DDB1 and CUL4 associated factor 7(DCAF7)
ZNF784	zinc finger protein 784(ZNF784)
RCC2	regulator of chromosome condensation 2(RCC2)
ASCC3	activating signal cointegrator 1 complex subunit 3(ASCC3)
ROR1	receptor tyrosine kinase like orphan receptor 1(ROR1)
ZNF384	zinc finger protein 384(ZNF384)
ORAI2	ORAI calcium release-activated calcium modulator 2(ORAI2)
HSD17B11	hydroxysteroid 17-beta dehydrogenase 11(HSD17B11)
OSTF1	osteoclast stimulating factor 1(OSTF1)
GATSL2	GATS protein like 2(GATSL2)
RALGPS1	Ral GEF with PH domain and SH3 binding motif 1(RALGPS1)
CACNB1	calcium voltage-gated channel auxiliary subunit beta 1(CACNB1)
CACNB2	calcium voltage-gated channel auxiliary subunit beta 2(CACNB2)
FAM19A2	family with sequence similarity 19 member A2, C-C motif chemokine like(FAM19A2)
PRRC1	proline rich coiled-coil 1(PRRC1)
ARIH1	ariadne RBR E3 ubiquitin protein ligase 1(ARIH1)
ARNTL2	aryl hydrocarbon receptor nuclear translocator like 2(ARNTL2)
SERF2	small EDRK-rich factor 2(SERF2)
TECTA	tectorin alpha(TECTA)
SPPL3	signal peptide peptidase like 3(SPPL3)
PHYHIPL	phytanoyl-CoA 2-hydroxylase interacting protein like(PHYHIPL)
ACER3	alkaline ceramidase 3(ACER3)
ARHGEF33	Rho guanine nucleotide exchange factor 33(ARHGEF33)
ZC3H15	zinc finger CCCH-type containing 15(ZC3H15)
CYP46A1	cytochrome P450, family 46, subfamily A, polypeptide 1(CYP46A1)
TAOK1	TAO kinase 1(TAOK1)
PAIP2	poly(A) binding protein interacting protein 2(PAIP2)
ARHGEF38	Rho guanine nucleotide exchange factor 38(ARHGEF38)
ARHGEF37	Rho guanine nucleotide exchange factor 37(ARHGEF37)
ACER2	alkaline ceramidase 2(ACER2)
TAOK3	TAO kinase 3(TAOK3)
ESRRG	estrogen related receptor gamma(ESRRG)
ACACA	acetyl-CoA carboxylase alpha(ACACA)
DUSP22	dual specificity phosphatase 22(DUSP22)
ATR	ataxia telangiectasia and Rad3 related(ATR)
GAS7	growth arrest specific 7(GAS7)
FNIP1	folliculin interacting protein 1(FNIP1)
CDC42BPG	CDC42 binding protein kinase gamma(CDC42BPG)
RGS2	regulator of G-protein signaling 2(RGS2)
FAM151B	family with sequence similarity 151 member B(FAM151B)
RGS4	regulator of G-protein signaling 4(RGS4)
PKP4	plakophilin 4(PKP4)
CDC42BPA	CDC42 binding protein kinase alpha(CDC42BPA)
RGS7	regulator of G-protein signaling 7(RGS7)
TRAFD1	TRAF-type zinc finger domain containing 1(TRAFD1)
CDC42BPB	CDC42 binding protein kinase beta(CDC42BPB)
CREBRF	CREB3 regulatory factor(CREBRF)
GRIP1	glutamate receptor interacting protein 1(GRIP1)
UBE2G1	ubiquitin conjugating enzyme E2 G1(UBE2G1)
U2SURP	U2 snRNP associated SURP domain containing(U2SURP)
EZH2	enhancer of zeste 2 polycomb repressive complex 2 subunit(EZH2)
ATP10D	ATPase phospholipid transporting 10D (putative)(ATP10D)
RNF183	ring finger protein 183(RNF183)
CILP2	cartilage intermediate layer protein 2(CILP2)
MGRN1	mahogunin ring finger 1(MGRN1)
IL1RAP	interleukin 1 receptor accessory protein(IL1RAP)
USP12	ubiquitin specific peptidase 12(USP12)
SLC22A5	solute carrier family 22 member 5(SLC22A5)
BHLHE41	basic helix-loop-helix family member e41(BHLHE41)
USP15	ubiquitin specific peptidase 15(USP15)
ERRFI1	ERBB receptor feedback inhibitor 1(ERRFI1)
BRD8	bromodomain containing 8(BRD8)
CCDC28B	coiled-coil domain containing 28B(CCDC28B)
ZC3H7B	zinc finger CCCH-type containing 7B(ZC3H7B)
PIK3C2A	phosphatidylinositol-4-phosphate 3-kinase catalytic subunit type 2 alpha(PIK3C2A)
PIK3C2B	phosphatidylinositol-4-phosphate 3-kinase catalytic subunit type 2 beta(PIK3C2B)
ANP32E	acidic nuclear phosphoprotein 32 family member E(ANP32E)
GLCCI1	glucocorticoid induced 1(GLCCI1)
ARHGEF15	Rho guanine nucleotide exchange factor 15(ARHGEF15)
IL6R	interleukin 6 receptor(IL6R)
CCT6A	chaperonin containing TCP1 subunit 6A(CCT6A)
MMP15	matrix metallopeptidase 15(MMP15)
RFTN1	raftlin, lipid raft linker 1(RFTN1)
ELMO2	engulfment and cell motility 2(ELMO2)
ELMO1	engulfment and cell motility 1(ELMO1)
GTSF1	gametocyte specific factor 1(GTSF1)
KLHDC3	kelch domain containing 3(KLHDC3)
BRWD3	bromodomain and WD repeat domain containing 3(BRWD3)
MYRIP	myosin VIIA and Rab interacting protein(MYRIP)
EREG	epiregulin(EREG)
EIF4A2	eukaryotic translation initiation factor 4A2(EIF4A2)
PLXDC2	plexin domain containing 2(PLXDC2)
NUP107	nucleoporin 107(NUP107)
ZNF746	zinc finger protein 746(ZNF746)
DOLPP1	dolichyldiphosphatase 1(DOLPP1)
USP25	ubiquitin specific peptidase 25(USP25)
USP24	ubiquitin specific peptidase 24(USP24)
MEGF8	multiple EGF like domains 8(MEGF8)
ABHD6	abhydrolase domain containing 6(ABHD6)
ABHD4	abhydrolase domain containing 4(ABHD4)
MKNK2	MAP kinase interacting serine/threonine kinase 2(MKNK2)
UGDH	UDP-glucose 6-dehydrogenase(UGDH)
AZIN1	antizyme inhibitor 1(AZIN1)
NECAB3	N-terminal EF-hand calcium binding protein 3(NECAB3)
NECAB1	N-terminal EF-hand calcium binding protein 1(NECAB1)
SF3B1	splicing factor 3b subunit 1(SF3B1)
IGSF11	immunoglobulin superfamily member 11(IGSF11)
SORBS1	sorbin and SH3 domain containing 1(SORBS1)
DDX19A	DEAD-box helicase 19A(DDX19A)
USP38	ubiquitin specific peptidase 38(USP38)
MARS2	methionyl-tRNA synthetase 2, mitochondrial(MARS2)
USP37	ubiquitin specific peptidase 37(USP37)
PKD1	polycystin 1, transient receptor potential channel interacting(PKD1)
MTMR9	myotubularin related protein 9(MTMR9)
MTMR6	myotubularin related protein 6(MTMR6)
USP34	ubiquitin specific peptidase 34(USP34)
PTX3	pentraxin 3(PTX3)
USP31	ubiquitin specific peptidase 31(USP31)
BRD1	bromodomain containing 1(BRD1)
SSRP1	structure specific recognition protein 1(SSRP1)
LRRC40	leucine rich repeat containing 40(LRRC40)
BRD3	bromodomain containing 3(BRD3)
CNST	consortin, connexin sorting protein(CNST)
LRRC41	leucine rich repeat containing 41(LRRC41)
RNF19A	ring finger protein 19A, RBR E3 ubiquitin protein ligase(RNF19A)
ZNF770	zinc finger protein 770(ZNF770)
IGF2	insulin like growth factor 2(IGF2)
TRIM24	tripartite motif containing 24(TRIM24)
TRIM23	tripartite motif containing 23(TRIM23)
TMEM2	transmembrane protein 2(TMEM2)
ATRX	ATRX, chromatin remodeler(ATRX)
DUSP5	dual specificity phosphatase 5(DUSP5)
NRAS	neuroblastoma RAS viral oncogene homolog(NRAS)
DUSP3	dual specificity phosphatase 3(DUSP3)
LRP1	LDL receptor related protein 1(LRP1)
DUSP1	dual specificity phosphatase 1(DUSP1)
ZNF362	zinc finger protein 362(ZNF362)
LRRC3B	leucine rich repeat containing 3B(LRRC3B)
GSK3B	glycogen synthase kinase 3 beta(GSK3B)
LRP6	LDL receptor related protein 6(LRP6)
USP47	ubiquitin specific peptidase 47(USP47)
AMOT	angiomotin(AMOT)
USP46	ubiquitin specific peptidase 46(USP46)
USP48	ubiquitin specific peptidase 48(USP48)
HPGD	hydroxyprostaglandin dehydrogenase 15-(NAD)(HPGD)
DUSP7	dual specificity phosphatase 7(DUSP7)
LRP4	LDL receptor related protein 4(LRP4)
ENHO	energy homeostasis associated(ENHO)
DUSP6	dual specificity phosphatase 6(DUSP6)
GNA13	G protein subunit alpha 13(GNA13)
MTSS1	MTSS1, I-BAR domain containing(MTSS1)
JDP2	Jun dimerization protein 2(JDP2)
PRPF4B	pre-mRNA processing factor 4B(PRPF4B)
IL16	interleukin 16(IL16)
GRIK2	glutamate ionotropic receptor kainate type subunit 2(GRIK2)
IL13	interleukin 13(IL13)
NFXL1	nuclear transcription factor, X-box binding like 1(NFXL1)
OTUB2	OTU deubiquitinase, ubiquitin aldehyde binding 2(OTUB2)
RGL1	ral guanine nucleotide dissociation stimulator like 1(RGL1)
TGFB2	transforming growth factor beta 2(TGFB2)
CTNNBL1	catenin beta like 1(CTNNBL1)
ZNF304	zinc finger protein 304(ZNF304)
EIF4EBP1	eukaryotic translation initiation factor 4E binding protein 1(EIF4EBP1)
EIF4EBP2	eukaryotic translation initiation factor 4E binding protein 2(EIF4EBP2)
RNF141	ring finger protein 141(RNF141)
NUDCD1	NudC domain containing 1(NUDCD1)
PACSIN2	protein kinase C and casein kinase substrate in neurons 2(PACSIN2)
MFHAS1	malignant fibrous histiocytoma amplified sequence 1(MFHAS1)
TIA1	TIA1 cytotoxic granule associated RNA binding protein(TIA1)
FRS2	fibroblast growth factor receptor substrate 2(FRS2)
SAMD4A	sterile alpha motif domain containing 4A(SAMD4A)
SAMD4B	sterile alpha motif domain containing 4B(SAMD4B)
TMEM167A	transmembrane protein 167A(TMEM167A)
ANKRD33B	ankyrin repeat domain 33B(ANKRD33B)
CERCAM	cerebral endothelial cell adhesion molecule(CERCAM)
BICD2	BICD cargo adaptor 2(BICD2)
PKIA	protein kinase (cAMP-dependent, catalytic) inhibitor alpha(PKIA)
TACC1	transforming acidic coiled-coil containing protein 1(TACC1)
TACC2	transforming acidic coiled-coil containing protein 2(TACC2)
OTUD3	OTU deubiquitinase 3(OTUD3)
MIB1	mindbomb E3 ubiquitin protein ligase 1(MIB1)
DCUN1D1	defective in cullin neddylation 1 domain containing 1(DCUN1D1)
DTWD2	DTW domain containing 2(DTWD2)
SMARCA5	SWI/SNF related, matrix associated, actin dependent regulator of chromatin, subfamily a, member 5(SMARCA5)
RNF139	ring finger protein 139(RNF139)
RNF138	ring finger protein 138(RNF138)
NFE2L2	nuclear factor, erythroid 2 like 2(NFE2L2)
SMARCA1	SWI/SNF related, matrix associated, actin dependent regulator of chromatin, subfamily a, member 1(SMARCA1)
DCUN1D3	defective in cullin neddylation 1 domain containing 3(DCUN1D3)
LRRK2	leucine rich repeat kinase 2(LRRK2)
NFE2L3	nuclear factor, erythroid 2 like 3(NFE2L3)
DCUN1D4	defective in cullin neddylation 1 domain containing 4(DCUN1D4)
SMARCA4	SWI/SNF related, matrix associated, actin dependent regulator of chromatin, subfamily a, member 4(SMARCA4)
FBXO11	F-box protein 11(FBXO11)
COBL	cordon-bleu WH2 repeat protein(COBL)
ELAC1	elaC ribonuclease Z 1(ELAC1)
ADAMTSL1	ADAMTS like 1(ADAMTSL1)
ELAC2	elaC ribonuclease Z 2(ELAC2)
GLUD1	glutamate dehydrogenase 1(GLUD1)
TFEB	transcription factor EB(TFEB)
CERS6	ceramide synthase 6(CERS6)
UBE2V2	ubiquitin-conjugating enzyme E2 variant 2(UBE2V2)
BICC1	BicC family RNA binding protein 1(BICC1)
IL34	interleukin 34(IL34)
NR2C2	nuclear receptor subfamily 2 group C member 2(NR2C2)
ATF2	activating transcription factor 2(ATF2)
FBXW9	F-box and WD repeat domain containing 9(FBXW9)
QSER1	glutamine and serine rich 1(QSER1)
ZNF322	zinc finger protein 322(ZNF322)
FBXW7	F-box and WD repeat domain containing 7(FBXW7)
CERS2	ceramide synthase 2(CERS2)
FBXW4	F-box and WD repeat domain containing 4(FBXW4)
TFDP2	transcription factor Dp-2(TFDP2)
RNF169	ring finger protein 169(RNF169)
FBXO41	F-box protein 41(FBXO41)
ARHGDIA	Rho GDP dissociation inhibitor alpha(ARHGDIA)
UNKL	unkempt family like zinc finger(UNKL)
SDF2	stromal cell derived factor 2(SDF2)
AP2M1	adaptor related protein complex 2 mu 1 subunit(AP2M1)
SHPRH	SNF2 histone linker PHD RING helicase(SHPRH)
CREBZF	CREB/ATF bZIP transcription factor(CREBZF)
MYO1E	myosin IE(MYO1E)
THSD7B	thrombospondin type 1 domain containing 7B(THSD7B)
AIM1	absent in melanoma 1(AIM1)
FBXO38	F-box protein 38(FBXO38)
ATP7A	ATPase copper transporting alpha(ATP7A)
HDAC4	histone deacetylase 4(HDAC4)
NREP	neuronal regeneration related protein(NREP)
LAMP2	lysosomal associated membrane protein 2(LAMP2)
CDKN1A	cyclin dependent kinase inhibitor 1A(CDKN1A)
SARM1	sterile alpha and TIR motif containing 1(SARM1)
DYRK1A	dual specificity tyrosine phosphorylation regulated kinase 1A(DYRK1A)
TBXA2R	thromboxane A2 receptor(TBXA2R)
FBXO30	F-box protein 30(FBXO30)
MYO16	myosin XVI(MYO16)
RNF157	ring finger protein 157(RNF157)
FBXO33	F-box protein 33(FBXO33)
HDAC7	histone deacetylase 7(HDAC7)
E2F2	E2F transcription factor 2(E2F2)
IGDCC4	immunoglobulin superfamily DCC subclass member 4(IGDCC4)
IGDCC3	immunoglobulin superfamily DCC subclass member 3(IGDCC3)
RSF1	remodeling and spacing factor 1(RSF1)
E2F5	E2F transcription factor 5(E2F5)
ATL2	atlastin GTPase 2(ATL2)
E2F6	E2F transcription factor 6(E2F6)
LRRC8B	leucine rich repeat containing 8 family member B(LRRC8B)
PAWR	pro-apoptotic WT1 regulator(PAWR)
GABBR2	gamma-aminobutyric acid type B receptor subunit 2(GABBR2)
SDC4	syndecan 4(SDC4)
SDC2	syndecan 2(SDC2)
WARS	tryptophanyl-tRNA synthetase(WARS)
EDC3	enhancer of mRNA decapping 3(EDC3)
INO80D	INO80 complex subunit D(INO80D)
ZCCHC8	zinc finger CCHC-type containing 8(ZCCHC8)
ZCCHC3	zinc finger CCHC-type containing 3(ZCCHC3)
STXBP1	syntaxin binding protein 1(STXBP1)
PKN2	protein kinase N2(PKN2)
STXBP3	syntaxin binding protein 3(STXBP3)
GAN	gigaxonin(GAN)
SLC7A14	solute carrier family 7 member 14(SLC7A14)
TBCK	TBC1 domain containing kinase(TBCK)
STXBP5	syntaxin binding protein 5(STXBP5)
HOXC13	homeobox C13(HOXC13)
MAPRE2	microtubule associated protein RP/EB family member 2(MAPRE2)
CA3	carbonic anhydrase 3(CA3)
JMJD1C	jumonji domain containing 1C(JMJD1C)
ATPAF1	ATP synthase mitochondrial F1 complex assembly factor 1(ATPAF1)
SNX13	sorting nexin 13(SNX13)
PHLPP1	PH domain and leucine rich repeat protein phosphatase 1(PHLPP1)
OTUD4	OTU deubiquitinase 4(OTUD4)
SNX18	sorting nexin 18(SNX18)
HS3ST2	heparan sulfate-glucosamine 3-sulfotransferase 2(HS3ST2)
SNX16	sorting nexin 16(SNX16)
HS3ST1	heparan sulfate-glucosamine 3-sulfotransferase 1(HS3ST1)
APLP2	amyloid beta precursor like protein 2(APLP2)
UBE2R2	ubiquitin conjugating enzyme E2 R2(UBE2R2)
ISM1	isthmin 1(ISM1)
SEC16B	SEC16 homolog B, endoplasmic reticulum export factor(SEC16B)
TMED7	transmembrane p24 trafficking protein 7(TMED7)
TMED5	transmembrane p24 trafficking protein 5(TMED5)
SNX24	sorting nexin 24(SNX24)
APPBP2	amyloid beta precursor protein binding protein 2(APPBP2)
EHD1	EH domain containing 1(EHD1)
UBTD1	ubiquitin domain containing 1(UBTD1)
UBTD2	ubiquitin domain containing 2(UBTD2)
RNASE13	ribonuclease A family member 13 (inactive)(RNASE13)
TMC7	transmembrane channel like 7(TMC7)
CNNM3	cyclin and CBS domain divalent metal cation transport mediator 3(CNNM3)
CNNM4	cyclin and CBS domain divalent metal cation transport mediator 4(CNNM4)
SNX29	sorting nexin 29(SNX29)
SAMD12	sterile alpha motif domain containing 12(SAMD12)
SNX27	sorting nexin family member 27(SNX27)
SAMD10	sterile alpha motif domain containing 10(SAMD10)
CBL	Cbl proto-oncogene(CBL)
SAMD11	sterile alpha motif domain containing 11(SAMD11)
GRSF1	G-rich RNA sequence binding factor 1(GRSF1)
PROSER1	proline and serine rich 1(PROSER1)
SAMD14	sterile alpha motif domain containing 14(SAMD14)
SLBP	stem-loop binding protein(SLBP)
CNNM1	cyclin and CBS domain divalent metal cation transport mediator 1(CNNM1)
USP6NL	USP6 N-terminal like(USP6NL)
HSP90B1	heat shock protein 90 beta family member 1(HSP90B1)
SCN4B	sodium voltage-gated channel beta subunit 4(SCN4B)
CUL4B	cullin 4B(CUL4B)
SNX30	sorting nexin family member 30(SNX30)
RCN1	reticulocalbin 1(RCN1)
RCN2	reticulocalbin 2(RCN2)
CTTNBP2NL	CTTNBP2 N-terminal like(CTTNBP2NL)
RAB3GAP2	RAB3 GTPase activating non-catalytic protein subunit 2(RAB3GAP2)
CADM1	cell adhesion molecule 1(CADM1)
STAT5A	signal transducer and activator of transcription 5A(STAT5A)
EDN1	endothelin 1(EDN1)
CNPPD1	cyclin Pas1/PHO80 domain containing 1(CNPPD1)
DNAJB14	DnaJ heat shock protein family (Hsp40) member B14(DNAJB14)
DNAJB12	DnaJ heat shock protein family (Hsp40) member B12(DNAJB12)
SIDT1	SID1 transmembrane family member 1(SIDT1)
SIDT2	SID1 transmembrane family member 2(SIDT2)
MEGF11	multiple EGF like domains 11(MEGF11)
CD47	CD47 molecule(CD47)
GRID2	glutamate ionotropic receptor delta type subunit 2(GRID2)
ABCB10	ATP binding cassette subfamily B member 10(ABCB10)
SREK1IP1	SREK1 interacting protein 1(SREK1IP1)
COL10A1	collagen type X alpha 1 chain(COL10A1)
PLD3	phospholipase D family member 3(PLD3)
TXNL1	thioredoxin like 1(TXNL1)
SGPL1	sphingosine-1-phosphate lyase 1(SGPL1)
PLD2	phospholipase D2(PLD2)
GPR137	G protein-coupled receptor 137(GPR137)
PLD1	phospholipase D1(PLD1)
BCR	BCR, RhoGEF and GTPase activating protein(BCR)
RPUSD2	RNA pseudouridylate synthase domain containing 2(RPUSD2)
GPR135	G protein-coupled receptor 135(GPR135)
WNK1	WNK lysine deficient protein kinase 1(WNK1)
DCTN1	dynactin subunit 1(DCTN1)
CCR7	C-C motif chemokine receptor 7(CCR7)
UBR7	ubiquitin protein ligase E3 component n-recognin 7 (putative)(UBR7)
VEGFA	vascular endothelial growth factor A(VEGFA)
TMEM170B	transmembrane protein 170B(TMEM170B)
FBXL7	F-box and leucine rich repeat protein 7(FBXL7)
BIN3	bridging integrator 3(BIN3)
HAS3	hyaluronan synthase 3(HAS3)
AMFR	autocrine motility factor receptor(AMFR)
NEK4	NIMA related kinase 4(NEK4)
NEK6	NIMA related kinase 6(NEK6)
FBXL2	F-box and leucine rich repeat protein 2(FBXL2)
NEK7	NIMA related kinase 7(NEK7)
TMX1	thioredoxin related transmembrane protein 1(TMX1)
GPR146	G protein-coupled receptor 146(GPR146)
CDK5R1	cyclin dependent kinase 5 regulatory subunit 1(CDK5R1)
LMNB1	lamin B1(LMNB1)
TMX4	thioredoxin related transmembrane protein 4(TMX4)
STK17B	serine/threonine kinase 17b(STK17B)
PRR14L	proline rich 14 like(PRR14L)
SFXN1	sideroflexin 1(SFXN1)
COIL	coilin(COIL)
MYO9A	myosin IXA(MYO9A)
PPAT	phosphoribosyl pyrophosphate amidotransferase(PPAT)
FAM65B	family with sequence similarity 65 member B(FAM65B)
PLAGL1	PLAG1 like zinc finger 1(PLAGL1)
TAL1	TAL bHLH transcription factor 1, erythroid differentiation factor(TAL1)
STX12	syntaxin 12(STX12)
KRAS	KRAS proto-oncogene, GTPase(KRAS)
STX17	syntaxin 17(STX17)
STX16	syntaxin 16(STX16)
IDH2	isocitrate dehydrogenase (NADP(+)) 2, mitochondrial(IDH2)
AMD1	adenosylmethionine decarboxylase 1(AMD1)
RAP1GAP2	RAP1 GTPase activating protein 2(RAP1GAP2)
PLAGL2	PLAG1 like zinc finger 2(PLAGL2)
GPR156	G protein-coupled receptor 156(GPR156)
TSEN54	tRNA splicing endonuclease subunit 54(TSEN54)
ST6GAL1	ST6 beta-galactoside alpha-2,6-sialyltransferase 1(ST6GAL1)
IKZF2	IKAROS family zinc finger 2(IKZF2)
LAMTOR1	late endosomal/lysosomal adaptor, MAPK and MTOR activator 1(LAMTOR1)
MAML2	mastermind like transcriptional coactivator 2(MAML2)
NDFIP1	Nedd4 family interacting protein 1(NDFIP1)
TM2D3	TM2 domain containing 3(TM2D3)
KLHDC8B	kelch domain containing 8B(KLHDC8B)
OXSR1	oxidative stress responsive 1(OXSR1)
DDX5	DEAD-box helicase 5(DDX5)
CD63	CD63 molecule(CD63)
LARP4B	La ribonucleoprotein domain family member 4B(LARP4B)
TMEM39A	transmembrane protein 39A(TMEM39A)
SEMA6A	semaphorin 6A(SEMA6A)
DESI2	desumoylating isopeptidase 2(DESI2)
ZFHX4	zinc finger homeobox 4(ZFHX4)
SEMA6D	semaphorin 6D(SEMA6D)
KAT6B	lysine acetyltransferase 6B(KAT6B)
METTL17	methyltransferase like 17(METTL17)
KAT6A	lysine acetyltransferase 6A(KAT6A)
AHDC1	AT-hook DNA binding motif containing 1(AHDC1)
NRP2	neuropilin 2(NRP2)
JPH3	junctophilin 3(JPH3)
ATP6V0E1	ATPase H+ transporting V0 subunit e1(ATP6V0E1)
NRP1	neuropilin 1(NRP1)
COL21A1	collagen type XXI alpha 1 chain(COL21A1)
GREB1	growth regulation by estrogen in breast cancer 1(GREB1)
CPEB4	cytoplasmic polyadenylation element binding protein 4(CPEB4)
ANPEP	alanyl aminopeptidase, membrane(ANPEP)
CPEB1	cytoplasmic polyadenylation element binding protein 1(CPEB1)
SENP6	SUMO1/sentrin specific peptidase 6(SENP6)
PTER	phosphotriesterase related(PTER)
PDPK1	3-phosphoinositide dependent protein kinase 1(PDPK1)
HIF1AN	hypoxia inducible factor 1 alpha subunit inhibitor(HIF1AN)
SEMA3F	semaphorin 3F(SEMA3F)
SEMA3D	semaphorin 3D(SEMA3D)
SEMA3A	semaphorin 3A(SEMA3A)
PIEZO1	piezo type mechanosensitive ion channel component 1(PIEZO1)
GOLM1	golgi membrane protein 1(GOLM1)
GPR173	G protein-coupled receptor 173(GPR173)
KIAA1324L	KIAA1324 like(KIAA1324L)
GPR176	G protein-coupled receptor 176(GPR176)
CCNJ	cyclin J(CCNJ)
RPGR	retinitis pigmentosa GTPase regulator(RPGR)
JKAMP	JNK1/MAPK8-associated membrane protein(JKAMP)
ZFP30	ZFP30 zinc finger protein(ZFP30)
CCNF	cyclin F(CCNF)
COL25A1	collagen type XXV alpha 1 chain(COL25A1)
ARRDC3	arrestin domain containing 3(ARRDC3)
CD164	CD164 molecule(CD164)
HAO1	hydroxyacid oxidase 1(HAO1)
SLC26A4	solute carrier family 26 member 4(SLC26A4)
SENP1	SUMO1/sentrin specific peptidase 1(SENP1)
ADM	adrenomedullin(ADM)
SEMA4F	ssemaphorin 4F(SEMA4F)
SLC26A7	solute carrier family 26 member 7(SLC26A7)
ADK	adenosine kinase(ADK)
SLC26A9	solute carrier family 26 member 9(SLC26A9)
MAP3K10	mitogen-activated protein kinase kinase kinase 10(MAP3K10)
SEMA4C	semaphorin 4C(SEMA4C)
IFFO2	intermediate filament family orphan 2(IFFO2)
SEMA4D	semaphorin 4D(SEMA4D)
STEAP2	STEAP2 metalloreductase(STEAP2)
IFFO1	intermediate filament family orphan 1(IFFO1)
MAP3K11	mitogen-activated protein kinase kinase kinase 11(MAP3K11)
GPR180	G protein-coupled receptor 180(GPR180)
LIMS1	LIM zinc finger domain containing 1(LIMS1)
LIMS2	LIM zinc finger domain containing 2(LIMS2)
THAP9	THAP domain containing 9(THAP9)
COL3A1	collagen type III alpha 1 chain(COL3A1)
DCHS1	dachsous cadherin-related 1(DCHS1)
GJC1	gap junction protein gamma 1(GJC1)
ZFP36L1	ZFP36 ring finger protein like 1(ZFP36L1)
ZFP36L2	ZFP36 ring finger protein like 2(ZFP36L2)
IL10RB	interleukin 10 receptor subunit beta(IL10RB)
NR1D2	nuclear receptor subfamily 1 group D member 2(NR1D2)
THAP1	THAP domain containing 1(THAP1)
BAZ2B	bromodomain adjacent to zinc finger domain 2B(BAZ2B)
TES	testin LIM domain protein(TES)
NEMF	nuclear export mediator factor(NEMF)
DLGAP4	DLG associated protein 4(DLGAP4)
NKAPL	NFKB activating protein like(NKAPL)
MSRB3	methionine sulfoxide reductase B3(MSRB3)
SLC16A3	solute carrier family 16 member 3(SLC16A3)
SLC16A2	solute carrier family 16 member 2(SLC16A2)
TEX2	testis expressed 2(TEX2)
SLC16A7	solute carrier family 16 member 7(SLC16A7)
AREL1	apoptosis resistant E3 ubiquitin protein ligase 1(AREL1)
GRIA2	glutamate ionotropic receptor AMPA type subunit 2(GRIA2)
GRIA1	glutamate ionotropic receptor AMPA type subunit 1(GRIA1)
SLC16A6	solute carrier family 16 member 6(SLC16A6)
SLC16A9	solute carrier family 16 member 9(SLC16A9)
NINL	ninein like(NINL)
LRRN1	leucine rich repeat neuronal 1(LRRN1)
PTCH1	patched 1(PTCH1)
MKRN1	makorin ring finger protein 1(MKRN1)
GABRB3	gamma-aminobutyric acid type A receptor beta3 subunit(GABRB3)
GABRB2	gamma-aminobutyric acid type A receptor beta2 subunit(GABRB2)
ZNF827	zinc finger protein 827(ZNF827)
FOXO1	forkhead box O1(FOXO1)
FOXO3	forkhead box O3(FOXO3)
FOXO4	forkhead box O4(FOXO4)
COX5A	cytochrome c oxidase subunit Va(COX5A)
MMP2	matrix metallopeptidase 2(MMP2)
NT5DC1	5'-nucleotidase domain containing 1(NT5DC1)
SLC25A20	solute carrier family 25 member 20(SLC25A20)
WNT4	Wnt family member 4(WNT4)
DMXL1	Dmx like 1(DMXL1)
SLC16A1	solute carrier family 16 member 1(SLC16A1)
WNT3	Wnt family member 3(WNT3)
DMXL2	Dmx like 2(DMXL2)
SLC25A25	solute carrier family 25 member 25(SLC25A25)
AKIRIN1	akirin 1(AKIRIN1)
SMIM19	small integral membrane protein 19(SMIM19)
CEP85	centrosomal protein 85(CEP85)
SMIM17	small integral membrane protein 17(SMIM17)
CSNK1G2	casein kinase 1 gamma 2(CSNK1G2)
FA2H	fatty acid 2-hydroxylase(FA2H)
SMIM13	small integral membrane protein 13(SMIM13)
TRIM41	tripartite motif containing 41(TRIM41)
FAM118A	family with sequence similarity 118 member A(FAM118A)
RAI14	retinoic acid induced 14(RAI14)
FOXN2	forkhead box N2(FOXN2)
LYPLA1	lysophospholipase I(LYPLA1)
FAM118B	family with sequence similarity 118 member B(FAM118B)
AHR	aryl hydrocarbon receptor(AHR)
FOXN3	forkhead box N3(FOXN3)
SLTM	SAFB like transcription modulator(SLTM)
RALGAPA1	Ral GTPase activating protein catalytic alpha subunit 1(RALGAPA1)
TRIM33	tripartite motif containing 33(TRIM33)
RIOK3	RIO kinase 3 (yeast)(RIOK3)
SLC25A35	solute carrier family 25 member 35(SLC25A35)
PYGO1	pygopus homolog 1 (Drosophila)(PYGO1)
OPHN1	oligophrenin 1(OPHN1)
ERC2	ELKS/RAB6-interacting/CAST family member 2(ERC2)
CSNK1G3	casein kinase 1 gamma 3(CSNK1G3)
MAP7D1	MAP7 domain containing 1(MAP7D1)
EMP2	epithelial membrane protein 2(EMP2)
EMP1	epithelial membrane protein 1(EMP1)
CEP97	centrosomal protein 97(CEP97)
ARL6IP1	ADP ribosylation factor like GTPase 6 interacting protein 1(ARL6IP1)
FGFR3	fibroblast growth factor receptor 3(FGFR3)
MRPS10	mitochondrial ribosomal protein S10(MRPS10)
COPS7B	COP9 signalosome subunit 7B(COPS7B)
TMEM63B	transmembrane protein 63B(TMEM63B)
TRIM68	tripartite motif containing 68(TRIM68)
BMF	Bcl2 modifying factor(BMF)
PPTC7	PTC7 protein phosphatase homolog(PPTC7)
FN1	fibronectin 1(FN1)
SETDB1	SET domain bifurcated 1(SETDB1)
GABRA2	gamma-aminobutyric acid type A receptor alpha2 subunit(GABRA2)
KAT7	lysine acetyltransferase 7(KAT7)
RFX4	regulatory factor X4(RFX4)
YIPF6	Yip1 domain family member 6(YIPF6)
GABRA5	gamma-aminobutyric acid type A receptor alpha5 subunit(GABRA5)
AK3	adenylate kinase 3(AK3)
LIN7C	lin-7 homolog C, crumbs cell polarity complex component(LIN7C)
KCTD2	potassium channel tetramerization domain containing 2(KCTD2)
TSN	translin(TSN)
KCTD5	potassium channel tetramerization domain containing 5(KCTD5)
CARD6	caspase recruitment domain family member 6(CARD6)
TRIM63	tripartite motif containing 63(TRIM63)
TET1	tet methylcytosine dioxygenase 1(TET1)
FOXP1	forkhead box P1(FOXP1)
LIN7A	lin-7 homolog A, crumbs cell polarity complex component(LIN7A)
KCTD6	potassium channel tetramerisation domain containing 6(KCTD6)
TRIM55	tripartite motif containing 55(TRIM55)
TRIM56	tripartite motif containing 56(TRIM56)
UBE2E3	ubiquitin conjugating enzyme E2 E3(UBE2E3)
KCTD9	potassium channel tetramerization domain containing 9(KCTD9)
SLC4A10	solute carrier family 4 member 10(SLC4A10)
TET3	tet methylcytosine dioxygenase 3(TET3)
NEDD1	neural precursor cell expressed, developmentally down-regulated 1(NEDD1)
PLEKHA5	pleckstrin homology domain containing A5(PLEKHA5)
PPIC	peptidylprolyl isomerase C(PPIC)
RFX3	regulatory factor X3(RFX3)
ANTXR2	anthrax toxin receptor 2(ANTXR2)
YIPF4	Yip1 domain family member 4(YIPF4)
SLC25A16	solute carrier family 25 member 16(SLC25A16)
SCMH1	sex comb on midleg homolog 1 (Drosophila)(SCMH1)
PDCD6	programmed cell death 6(PDCD6)
SLC25A15	solute carrier family 25 member 15(SLC25A15)
SLC25A18	solute carrier family 25 member 18(SLC25A18)
UBE2E1	ubiquitin conjugating enzyme E2 E1(UBE2E1)
ARHGAP10	Rho GTPase activating protein 10(ARHGAP10)
CDK17	cyclin dependent kinase 17(CDK17)
OSBP	oxysterol binding protein(OSBP)
KIAA0226	KIAA0226 ortholog(KIAA0226)
FOXK1	forkhead box K1(FOXK1)
SGPP1	sphingosine-1-phosphate phosphatase 1(SGPP1)
SGPP2	sphingosine-1-phosphate phosphatase 2(SGPP2)
FOXK2	forkhead box K2(FOXK2)
ARHGAP18	Rho GTPase activating protein 18(ARHGAP18)
CBFA2T3	CBFA2/RUNX1 translocation partner 3(CBFA2T3)
ZZEF1	zinc finger ZZ-type and EF-hand domain containing 1(ZZEF1)
CBFA2T2	CBFA2/RUNX1 translocation partner 2(CBFA2T2)
PDCD4	programmed cell death 4 (neoplastic transformation inhibitor)(PDCD4)
DDR2	discoidin domain receptor tyrosine kinase 2(DDR2)
FAM63B	family with sequence similarity 63 member B(FAM63B)
LARP1	La ribonucleoprotein domain family member 1(LARP1)
ARHGAP21	Rho GTPase activating protein 21(ARHGAP21)
FUBP1	far upstream element (FUSE) binding protein 1(FUBP1)
FOS	Fos proto-oncogene, AP-1 transcription factor subunit(FOS)
DGCR2	DiGeorge syndrome critical region gene 2(DGCR2)
ARHGAP20	Rho GTPase activating protein 20(ARHGAP20)
DGCR8	DiGeorge syndrome critical region gene 8(DGCR8)
PCBP2	poly(rC) binding protein 2(PCBP2)
ITIH5	inter-alpha-trypsin inhibitor heavy chain family, member 5(ITIH5)
SHC1	SHC adaptor protein 1(SHC1)
CDK16	cyclin dependent kinase 16(CDK16)
MAPKBP1	mitogen-activated protein kinase binding protein 1(MAPKBP1)
NIPAL4	NIPA like domain containing 4(NIPAL4)
CDK13	cyclin dependent kinase 13(CDK13)
GABRG1	gamma-aminobutyric acid (GABA) A receptor, gamma 1(GABRG1)
FOXJ1	forkhead box J1(FOXJ1)
ARHGAP28	Rho GTPase activating protein 28(ARHGAP28)
FOXJ3	forkhead box J3(FOXJ3)
DNAI2	dynein axonemal intermediate chain 2(DNAI2)
ALK	anaplastic lymphoma receptor tyrosine kinase(ALK)
UBN2	ubinuclein 2(UBN2)
ARHGAP24	Rho GTPase activating protein 24(ARHGAP24)
UBN1	ubinuclein 1(UBN1)
EML5	echinoderm microtubule associated protein like 5(EML5)
ARHGAP26	Rho GTPase activating protein 26(ARHGAP26)
EML4	echinoderm microtubule associated protein like 4(EML4)
NRIP1	nuclear receptor interacting protein 1(NRIP1)
PANK3	pantothenate kinase 3(PANK3)
LARP4	La ribonucleoprotein domain family member 4(LARP4)
MDM4	MDM4, p53 regulator(MDM4)
C5H11orf87	chromosome 5 open reading frame, human C11orf87(C5H11orf87)
FRK	fyn related Src family tyrosine kinase(FRK)
PPP4R2	protein phosphatase 4 regulatory subunit 2(PPP4R2)
PPP4R1	protein phosphatase 4 regulatory subunit 1(PPP4R1)
MUM1L1	MUM1 like 1(MUM1L1)
GLIS2	GLIS family zinc finger 2(GLIS2)
TNC	tenascin C(TNC)
SLC37A4	solute carrier family 37 member 4(SLC37A4)
TRIB3	tribbles pseudokinase 3(TRIB3)
CYTH2	cytohesin 2(CYTH2)
CYTH3	cytohesin 3(CYTH3)
TRIB2	tribbles pseudokinase 2(TRIB2)
TYMS	thymidylate synthetase(TYMS)
NPTX1	neuronal pentraxin 1(NPTX1)
ERCC6	ERCC excision repair 6, chromatin remodeling factor(ERCC6)
MAP3K2	mitogen-activated protein kinase kinase kinase 2(MAP3K2)
NPTX2	neuronal pentraxin II(NPTX2)
MAP3K1	mitogen-activated protein kinase kinase kinase 1(MAP3K1)
POU2F1	POU class 2 homeobox 1(POU2F1)
CAMK2D	calcium/calmodulin dependent protein kinase II delta(CAMK2D)
ZC3H12B	zinc finger CCCH-type containing 12B(ZC3H12B)
BCAP29	B-cell receptor associated protein 29(BCAP29)
ETNK1	ethanolamine kinase 1(ETNK1)
SLC25A44	solute carrier family 25 member 44(SLC25A44)
TNN	tenascin N(TNN)
APMAP	adipocyte plasma membrane associated protein(APMAP)
SLC25A42	solute carrier family 25 member 42(SLC25A42)
STAMBP	STAM binding protein(STAMBP)
NUP153	nucleoporin 153(NUP153)
FOXL1	forkhead box L1(FOXL1)
NACC2	NACC family member 2(NACC2)
SCOC	short coiled-coil protein(SCOC)
FAM60A	family with sequence similarity 60 member A(FAM60A)
AMMECR1L	AMMECR1 like(AMMECR1L)
ATXN3	ataxin 3(ATXN3)
BMPER	BMP binding endothelial regulator(BMPER)
SYDE1	synapse defective Rho GTPase homolog 1(SYDE1)
ATXN7	ataxin 7(ATXN7)
CEP68	centrosomal protein 68(CEP68)
WSB2	WD repeat and SOCS box containing 2(WSB2)
SULF1	sulfatase 1(SULF1)
ZC3H11A	zinc finger CCCH-type containing 11A(ZC3H11A)
BMPR1B	bone morphogenetic protein receptor type 1B(BMPR1B)
GGNBP2	gametogenetin binding protein 2(GGNBP2)
SLC25A53	solute carrier family 25 member 53(SLC25A53)
CSN2	casein beta(CSN2)
LTBP1	latent transforming growth factor beta binding protein 1(LTBP1)
PTGS2	prostaglandin-endoperoxide synthase 2(PTGS2)
VTCN1	V-set domain containing T cell activation inhibitor 1(VTCN1)
NAA15	N(alpha)-acetyltransferase 15, NatA auxiliary subunit(NAA15)
CTTNBP2	cortactin binding protein 2(CTTNBP2)
PGPEP1	pyroglutamyl-peptidase I(PGPEP1)
FLI1	Fli-1 proto-oncogene, ETS transcription factor(FLI1)
GIT2	GIT ArfGAP 2(GIT2)
GNG2	G protein subunit gamma 2(GNG2)
GNG5	G protein subunit gamma 5(GNG5)
PLS3	plastin 3(PLS3)
GNG7	G protein subunit gamma 7(GNG7)
PTPRJ	protein tyrosine phosphatase, receptor type J(PTPRJ)
RCOR3	REST corepressor 3(RCOR3)
ZHX1	zinc fingers and homeoboxes 1(ZHX1)
ZHX2	zinc fingers and homeoboxes 2(ZHX2)
DCDC2	doublecortin domain containing 2(DCDC2)
HMG20A	high mobility group 20A(HMG20A)
NAA25	N(alpha)-acetyltransferase 25, NatB auxiliary subunit(NAA25)
CTNNA1	catenin alpha 1(CTNNA1)
CTDSPL2	CTD small phosphatase like 2(CTDSPL2)
CTNNA2	catenin alpha 2(CTNNA2)
SPAG9	sperm associated antigen 9(SPAG9)
ADAMTS6	ADAM metallopeptidase with thrombospondin type 1 motif 6(ADAMTS6)
ADAMTS9	ADAM metallopeptidase with thrombospondin type 1 motif 9(ADAMTS9)
ADAMTS8	ADAM metallopeptidase with thrombospondin type 1 motif 8(ADAMTS8)
ZZZ3	zinc finger ZZ-type containing 3(ZZZ3)
ADAMTS3	ADAM metallopeptidase with thrombospondin type 1 motif 3(ADAMTS3)
ADAMTS2	ADAM metallopeptidase with thrombospondin type 1 motif 2(ADAMTS2)
WFDC5	WAP four-disulfide core domain 5(WFDC5)
GNAI3	G protein subunit alpha i3(GNAI3)
UBA6	ubiquitin like modifier activating enzyme 6(UBA6)
PPT2	palmitoyl-protein thioesterase 2(PPT2)
SYPL2	synaptophysin like 2(SYPL2)
DAGLA	diacylglycerol lipase alpha(DAGLA)
PROCR	protein C receptor(PROCR)
GORASP1	golgi reassembly stacking protein 1(GORASP1)
TNKS	tankyrase(TNKS)
VEZF1	vascular endothelial zinc finger 1(VEZF1)
KLF12	Kruppel like factor 12(KLF12)
MAP2K3	mitogen-activated protein kinase kinase 3(MAP2K3)
KLF10	Kruppel like factor 10(KLF10)
TGFBR1	transforming growth factor beta receptor 1(TGFBR1)
FXR2	FMR1 autosomal homolog 2(FXR2)
MAP2	microtubule associated protein 2(MAP2)
TGFBR3	transforming growth factor beta receptor 3(TGFBR3)
HLF	HLF, PAR bZIP transcription factor(HLF)
GPR85	G protein-coupled receptor 85(GPR85)
AP3S1	adaptor related protein complex 3 sigma 1 subunit(AP3S1)
KHNYN	KH and NYN domain containing(KHNYN)
KCNK10	potassium two pore domain channel subfamily K member 10(KCNK10)
FAM168B	family with sequence similarity 168 member B(FAM168B)
FBXL19	F-box and leucine rich repeat protein 19(FBXL19)
CCNE1	cyclin E1(CCNE1)
FAM168A	family with sequence similarity 168 member A(FAM168A)
SLC23A2	solute carrier family 23 member 2(SLC23A2)
GUCY1A2	guanylate cyclase 1 soluble subunit alpha 2(GUCY1A2)
SIK1	salt inducible kinase 1(SIK1)
ZNF496	zinc finger protein 496(ZNF496)
ARHGEF3	Rho guanine nucleotide exchange factor 3(ARHGEF3)
ACO2	aconitase 2(ACO2)
GMEB1	glucocorticoid modulatory element binding protein 1(GMEB1)
ZSWIM6	zinc finger SWIM-type containing 6(ZSWIM6)
ERLIN2	ER lipid raft associated 2(ERLIN2)
ERLIN1	ER lipid raft associated 1(ERLIN1)
ZSWIM5	zinc finger SWIM-type containing 5(ZSWIM5)
PJA2	praja ring finger ubiquitin ligase 2(PJA2)
NCK2	NCK adaptor protein 2(NCK2)
CCND2	cyclin D2(CCND2)
RRM2	ribonucleotide reductase regulatory subunit M2(RRM2)
RRM1	ribonucleotide reductase catalytic subunit M1(RRM1)
GNB4	G protein subunit beta 4(GNB4)
KIAA1217	KIAA1217 ortholog(KIAA1217)
ZNF469	zinc finger protein 469(ZNF469)
NKD1	naked cuticle homolog 1(NKD1)
HK2	hexokinase 2(HK2)
FHL5	four and a half LIM domains 5(FHL5)
GNG12	G protein subunit gamma 12(GNG12)
ITM2B	integral membrane protein 2B(ITM2B)
FEM1B	fem-1 homolog B(FEM1B)
NUP210	nucleoporin 210(NUP210)
WIPF2	WAS/WASL interacting protein family member 2(WIPF2)
PER1	period circadian clock 1(PER1)
TBC1D4	TBC1 domain family member 4(TBC1D4)
SLC4A7	solute carrier family 4 member 7(SLC4A7)
LIMD2	LIM domain containing 2(LIMD2)
WIPF1	WAS/WASL interacting protein family member 1(WIPF1)
VMP1	vacuole membrane protein 1(VMP1)
TBC1D1	TBC1 domain family member 1(TBC1D1)
MYSM1	Myb like, SWIRM and MPN domains 1(MYSM1)
SIM1	single-minded family bHLH transcription factor 1(SIM1)
FLRT2	fibronectin leucine rich transmembrane protein 2(FLRT2)
TMPRSS2	transmembrane protease, serine 2(TMPRSS2)
SHMT2	serine hydroxymethyltransferase 2(SHMT2)
CAPN5	calpain 5(CAPN5)
MAT2A	methionine adenosyltransferase 2A(MAT2A)
KIAA1644	KIAA1644 ortholog(KIAA1644)
RICTOR	RPTOR independent companion of MTOR complex 2(RICTOR)
DOT1L	DOT1 like histone lysine methyltransferase(DOT1L)
VAT1L	vesicle amine transport 1 like(VAT1L)
RPS6KA6	ribosomal protein S6 kinase A6(RPS6KA6)
RPS6KA3	ribosomal protein S6 kinase A3(RPS6KA3)
RPS6KA1	ribosomal protein S6 kinase A1(RPS6KA1)
RPS6KA2	ribosomal protein S6 kinase A2(RPS6KA2)
PLN	phospholamban(PLN)
BNIP3L	BCL2 interacting protein 3 like(BNIP3L)
MCFD2	multiple coagulation factor deficiency 2(MCFD2)
SH3RF3	SH3 domain containing ring finger 3(SH3RF3)
ZNF462	zinc finger protein 462(ZNF462)
TCEB1	transcription elongation factor B subunit 1(TCEB1)
SLC44A1	solute carrier family 44 member 1(SLC44A1)
CNOT8	CCR4-NOT transcription complex subunit 8(CNOT8)
SLC44A2	solute carrier family 44 member 2(SLC44A2)
MAU2	MAU2 sister chromatid cohesion factor(MAU2)
XPO5	exportin 5(XPO5)
HMGCR	3-hydroxy-3-methylglutaryl-CoA reductase(HMGCR)
SLC44A5	solute carrier family 44 member 5(SLC44A5)
XPO4	exportin 4(XPO4)
LNX2	ligand of numb-protein X 2(LNX2)
RPS6KB1	ribosomal protein S6 kinase B1(RPS6KB1)
TBP	TATA-box binding protein(TBP)
IQGAP1	IQ motif containing GTPase activating protein 1(IQGAP1)
ZIC3	Zic family member 3(ZIC3)
CNOT4	CCR4-NOT transcription complex subunit 4(CNOT4)
RCBTB1	RCC1 and BTB domain containing protein 1(RCBTB1)
DAB2	DAB2, clathrin adaptor protein(DAB2)
FAM49B	family with sequence similarity 49 member B(FAM49B)
DAB1	DAB1, reelin adaptor protein(DAB1)
MIER2	MIER family member 2(MIER2)
PGRMC1	progesterone receptor membrane component 1(PGRMC1)
PGRMC2	progesterone receptor membrane component 2(PGRMC2)
SMIM3	small integral membrane protein 3(SMIM3)
SMIM5	small integral membrane protein 5(SMIM5)
GOLT1A	golgi transport 1A(GOLT1A)
TAZ	tafazzin(TAZ)
GRHL3	grainyhead like transcription factor 3(GRHL3)
ARID1A	AT-rich interaction domain 1A(ARID1A)
GRHL2	grainyhead like transcription factor 2(GRHL2)
DDIT3	DNA damage inducible transcript 3(DDIT3)
DDIT4	DNA damage inducible transcript 4(DDIT4)
BMP2K	BMP2 inducible kinase(BMP2K)
MFAP3	microfibrillar associated protein 3(MFAP3)
YARS2	tyrosyl-tRNA synthetase 2(YARS2)
EP400	E1A binding protein p400(EP400)
PAM	peptidylglycine alpha-amidating monooxygenase(PAM)
HMGB1	high mobility group box 1(HMGB1)
HMGB3	high mobility group box 3(HMGB3)
TMEM215	transmembrane protein 215(TMEM215)
DRD2	dopamine receptor D2(DRD2)
MRAS	muscle RAS oncogene homolog(MRAS)
ASTN1	astrotactin 1(ASTN1)
CTPS2	CTP synthase 2(CTPS2)
LRIG2	leucine rich repeats and immunoglobulin like domains 2(LRIG2)
LRIG3	leucine rich repeats and immunoglobulin like domains 3(LRIG3)
SESN2	sestrin 2(SESN2)
SESN1	sestrin 1(SESN1)
SESN3	sestrin 3(SESN3)
TMEM178B	transmembrane protein 178B(TMEM178B)
DOCK1	dedicator of cytokinesis 1(DOCK1)
POLE3	DNA polymerase epsilon 3, accessory subunit(POLE3)
GPR26	G protein-coupled receptor 26(GPR26)
TEK	TEK receptor tyrosine kinase(TEK)
LIPT2	lipoyl(octanoyl) transferase 2 (putative)(LIPT2)
TRAF6	TNF receptor associated factor 6(TRAF6)
B4GALT6	beta-1,4-galactosyltransferase 6(B4GALT6)
LYSMD1	LysM domain containing 1(LYSMD1)
TRAF4	TNF receptor associated factor 4(TRAF4)
LYSMD3	LysM domain containing 3(LYSMD3)
B4GALT5	beta-1,4-galactosyltransferase 5(B4GALT5)
ZNF423	zinc finger protein 423(ZNF423)
HCN1	hyperpolarization activated cyclic nucleotide gated potassium channel 1(HCN1)
XPOT	exportin for tRNA(XPOT)
FAM160A1	family with sequence similarity 160 member A1(FAM160A1)
VAV3	vav guanine nucleotide exchange factor 3(VAV3)
EPAS1	endothelial PAS domain protein 1(EPAS1)
TAF5	TATA-box binding protein associated factor 5(TAF5)
TMEM225	transmembrane protein 225(TMEM225)
SMG7	SMG7, nonsense mediated mRNA decay factor(SMG7)
ARID3A	AT-rich interaction domain 3A(ARID3A)
IREB2	iron responsive element binding protein 2(IREB2)
ARID3B	AT-rich interaction domain 3B(ARID3B)
DOCK6	dedicator of cytokinesis 6(DOCK6)
DOCK4	dedicator of cytokinesis 4(DOCK4)
TSC1	tuberous sclerosis 1(TSC1)
GPR37	G protein-coupled receptor 37(GPR37)
CDC42SE2	CDC42 small effector 2(CDC42SE2)
CDKN2AIP	CDKN2A interacting protein(CDKN2AIP)
ADAM22	ADAM metallopeptidase domain 22(ADAM22)
SYNGAP1	synaptic Ras GTPase activating protein 1(SYNGAP1)
SEL1L	SEL1L ERAD E3 ligase adaptor subunit(SEL1L)
ZNF410	zinc finger protein 410(ZNF410)
NDST1	N-deacetylase and N-sulfotransferase 1(NDST1)
NDST2	N-deacetylase/N-sulfotransferase (heparan glucosaminyl) 2(NDST2)
GPBP1	GC-rich promoter binding protein 1(GPBP1)
LEPR	leptin receptor(LEPR)
RHOQ	ras homolog family member Q(RHOQ)
WWC2	WW and C2 domain containing 2(WWC2)
PEX5	peroxisomal biogenesis factor 5(PEX5)
DEK	DEK proto-oncogene(DEK)
ALG6	ALG6, alpha-1,3-glucosyltransferase(ALG6)
PRDX3	peroxiredoxin 3(PRDX3)
PIP5K1A	phosphatidylinositol-4-phosphate 5-kinase type 1 alpha(PIP5K1A)
FRMD5	FERM domain containing 5(FRMD5)
LBH	limb bud and heart development(LBH)
FRMD6	FERM domain containing 6(FRMD6)
WWC3	WWC family member 3(WWC3)
RHOA	ras homolog family member A(RHOA)
LBR	lamin B receptor(LBR)
VASN	vasorin(VASN)
PURG	purine rich element binding protein G(PURG)
ANKS1A	ankyrin repeat and sterile alpha motif domain containing 1A(ANKS1A)
EVA1C	eva-1 homolog C(EVA1C)
LIMK2	LIM domain kinase 2(LIMK2)
MAN1A2	mannosidase alpha class 1A member 2(MAN1A2)
ARID5B	AT-rich interaction domain 5B(ARID5B)
CDK8	cyclin dependent kinase 8(CDK8)
ESR1	estrogen receptor 1(ESR1)
NCOA7	nuclear receptor coactivator 7(NCOA7)
CDK9	cyclin-dependent kinase 9(CDK9)
TMEM248	transmembrane protein 248(TMEM248)
MAN1A1	mannosidase alpha class 1A member 1(MAN1A1)
IPO8	importin 8(IPO8)
DDN	dendrin(DDN)
HMGA1	high mobility group AT-hook 1(HMGA1)
TMEM245	transmembrane protein 245(TMEM245)
CCNL2	cyclin L2(CCNL2)
PURA	purine rich element binding protein A(PURA)
TOR2A	torsin family 2 member A(TOR2A)
PPM1F	protein phosphatase, Mg2+/Mn2+ dependent 1F(PPM1F)
ATP6V1A	ATPase H+ transporting V1 subunit A(ATP6V1A)
PPM1D	protein phosphatase, Mg2+/Mn2+ dependent 1D(PPM1D)
ATG4D	autophagy related 4D cysteine peptidase(ATG4D)
NCOA2	nuclear receptor coactivator 2(NCOA2)
IPO7	importin 7(IPO7)
CHRM1	cholinergic receptor muscarinic 1(CHRM1)
FAM120C	family with sequence similarity 120C(FAM120C)
FRMD4B	FERM domain containing 4B(FRMD4B)
IPO5	importin 5(IPO5)
PPM1L	protein phosphatase, Mg2+/Mn2+ dependent 1L(PPM1L)
INPP4A	inositol polyphosphate-4-phosphatase type I A(INPP4A)
DCC	DCC netrin 1 receptor(DCC)
ADAMTS17	ADAM metallopeptidase with thrombospondin type 1 motif 17(ADAMTS17)
ADAMTS13	ADAM metallopeptidase with thrombospondin type 1 motif 13(ADAMTS13)
ADAMTS15	ADAM metallopeptidase with thrombospondin type 1 motif 15(ADAMTS15)
DCK	deoxycytidine kinase(DCK)
TAC1	tachykinin precursor 1(TAC1)
NFYC	nuclear transcription factor Y subunit gamma(NFYC)
NFYA	nuclear transcription factor Y subunit alpha(NFYA)
NR3C1	nuclear receptor subfamily 3 group C member 1(NR3C1)
PPM1B	protein phosphatase, Mg2+/Mn2+ dependent 1B(PPM1B)
PRDM16	PR/SET domain 16(PRDM16)
IVNS1ABP	influenza virus NS1A binding protein(IVNS1ABP)
ESYT1	extended synaptotagmin 1(ESYT1)
CDH5	cadherin 5(CDH5)
PRDM15	PR/SET domain 15(PRDM15)
CDH9	cadherin 9(CDH9)
A1CF	APOBEC1 complementation factor(A1CF)
AP3M1	adaptor related protein complex 3 mu 1 subunit(AP3M1)
SH2B3	SH2B adaptor protein 3(SH2B3)
INPP5D	inositol polyphosphate-5-phosphatase D(INPP5D)
DCX	doublecortin(DCX)
INPP5A	inositol polyphosphate-5-phosphatase A(INPP5A)
RNF144A	ring finger protein 144A(RNF144A)
SLC12A2	solute carrier family 12 member 2(SLC12A2)
SLC12A5	solute carrier family 12 member 5(SLC12A5)
SMC5	structural maintenance of chromosomes 5(SMC5)
TSPAN14	tetraspanin 14(TSPAN14)
TSPAN13	tetraspanin 13(TSPAN13)
WBP1L	WW domain binding protein 1-like(WBP1L)
LEP	leptin(LEP)
ITPA	inosine triphosphatase(ITPA)
RDH10	retinol dehydrogenase 10 (all-trans)(RDH10)
IFIT5	interferon induced protein with tetratricopeptide repeats 5(IFIT5)
IPPK	inositol-pentakisphosphate 2-kinase(IPPK)
RDH14	retinol dehydrogenase 14 (all-trans/9-cis/11-cis)(RDH14)
ATP1B3	ATPase Na+/K+ transporting subunit beta 3(ATP1B3)
VAPA	VAMP associated protein A(VAPA)
CHMP5	charged multivesicular body protein 5(CHMP5)
EFNA1	ephrin A1(EFNA1)
VAPB	VAMP associated protein B and C(VAPB)
ATP1B4	ATPase Na+/K+ transporting family member beta 4(ATP1B4)
CHMP7	charged multivesicular body protein 7(CHMP7)
PITPNB	phosphatidylinositol transfer protein beta(PITPNB)
EFNA3	ephrin A3(EFNA3)
SHH	sonic hedgehog(SHH)
TAF7L	TATA-box binding protein associated factor 7 like(TAF7L)
FAM92B	family with sequence similarity 92 member B(FAM92B)
SHB	SH2 domain containing adaptor protein B(SHB)
TRAK2	trafficking kinesin protein 2(TRAK2)
INSIG2	insulin induced gene 2(INSIG2)
PRRT2	proline rich transmembrane protein 2(PRRT2)
PRRT3	proline rich transmembrane protein 3(PRRT3)
RAVER2	ribonucleoprotein, PTB binding 2(RAVER2)
GAB1	GRB2 associated binding protein 1(GAB1)
RAPGEF5	Rap guanine nucleotide exchange factor 5(RAPGEF5)
FAM53C	family with sequence similarity 53 member C(FAM53C)
DEPDC1B	DEP domain containing 1B(DEPDC1B)
RAPGEF2	Rap guanine nucleotide exchange factor (GEF) 2(RAPGEF2)
RAPGEF1	Rap guanine nucleotide exchange factor 1(RAPGEF1)
OXR1	oxidation resistance 1(OXR1)
PAN2	PAN2 poly(A) specific ribonuclease subunit(PAN2)
SLC12A6	solute carrier family 12 member 6(SLC12A6)
LYRM2	LYR motif containing 2(LYRM2)
SLC12A9	solute carrier family 12 member 9(SLC12A9)
NUDT12	nudix hydrolase 12(NUDT12)
MDGA1	MAM domain containing glycosylphosphatidylinositol anchor 1(MDGA1)
EFNB2	ephrin B2(EFNB2)
STRN4	striatin 4(STRN4)
ABCC10	ATP binding cassette subfamily C member 10(ABCC10)
GID8	GID complex subunit 8 homolog(GID8)
DEPDC1	DEP domain containing 1(DEPDC1)
VASH1	vasohibin 1(VASH1)
PRELP	proline and arginine rich end leucine rich repeat protein(PRELP)
GID4	GID complex subunit 4 homolog(GID4)
RIC8A	RIC8 guanine nucleotide exchange factor A(RIC8A)
GAPVD1	GTPase activating protein and VPS9 domains 1(GAPVD1)
CGN	cingulin(CGN)
NOP9	NOP9 nucleolar protein(NOP9)
TMEM184B	transmembrane protein 184B(TMEM184B)
TMEM184C	transmembrane protein 184C(TMEM184C)
SRP72	signal recognition particle 72(SRP72)
ADD3	adducin 3(ADD3)
HS3ST3B1	heparan sulfate-glucosamine 3-sulfotransferase 3B1(HS3ST3B1)
ADD2	adducin 2(ADD2)
SUPT6H	SPT6 homolog, histone chaperone(SUPT6H)
HOXA13	homeobox A13(HOXA13)
SRSF10	serine and arginine rich splicing factor 10(SRSF10)
TAF9B	TATA-box binding protein associated factor 9b(TAF9B)
SRSF11	serine and arginine rich splicing factor 11(SRSF11)
CA5B	carbonic anhydrase 5B(CA5B)
DAG1	dystroglycan 1(DAG1)
AKAP12	A-kinase anchoring protein 12(AKAP12)
ASAP1	ArfGAP with SH3 domain, ankyrin repeat and PH domain 1(ASAP1)
DMWD	dystrophia myotonica, WD repeat containing(DMWD)
IGF2BP3	insulin like growth factor 2 mRNA binding protein 3(IGF2BP3)
CAPZB	capping actin protein of muscle Z-line beta subunit(CAPZB)
PIN1	peptidylprolyl cis/trans isomerase, NIMA-interacting 1(PIN1)
TRAM2	translocation associated membrane protein 2(TRAM2)
SERINC5	serine incorporator 5(SERINC5)
AGGF1	angiogenic factor with G-patch and FHA domains 1(AGGF1)
SERINC1	serine incorporator 1(SERINC1)
KIAA0930	KIAA0930 ortholog(KIAA0930)
TMEM183A	transmembrane protein 183A(TMEM183A)
BMP3	bone morphogenetic protein 3(BMP3)
TRPC4	transient receptor potential cation channel subfamily C member 4(TRPC4)
TRPC3	transient receptor potential cation channel subfamily C member 3(TRPC3)
ANKMY2	ankyrin repeat and MYND domain containing 2(ANKMY2)
SMAD4	SMAD family member 4(SMAD4)
SKI	SKI proto-oncogene(SKI)
SMAD2	SMAD family member 2(SMAD2)
SMAD1	SMAD family member 1(SMAD1)
OTOGL	otogelin like(OTOGL)
PSORS1C2	psoriasis susceptibility 1 candidate 2(PSORS1C2)
TMOD2	tropomodulin 2(TMOD2)
RHEB	Ras homolog enriched in brain(RHEB)
TMOD3	tropomodulin 3(TMOD3)
BMP5	bone morphogenetic protein 5(BMP5)
FAM91A1	family with sequence similarity 91 member A1(FAM91A1)
SLC16A13	solute carrier family 16 member 13(SLC16A13)
ENY2	ENY2, transcription and export complex 2 subunit(ENY2)
CCNT2	cyclin T2(CCNT2)
SLC16A14	solute carrier family 16 member 14(SLC16A14)
ORMDL1	ORMDL sphingolipid biosynthesis regulator 1(ORMDL1)
TIMM17A	translocase of inner mitochondrial membrane 17 homolog A (yeast)(TIMM17A)
TIMM17B	translocase of inner mitochondrial membrane 17 homolog B (yeast)(TIMM17B)
CCNT1	cyclin T1(CCNT1)
UVRAG	UV radiation resistance associated(UVRAG)
COPS8	COP9 signalosome subunit 8(COPS8)
CAMKK1	calcium/calmodulin dependent protein kinase kinase 1(CAMKK1)
FAM129B	family with sequence similarity 129 member B(FAM129B)
NR2F1	nuclear receptor subfamily 2 group F member 1(NR2F1)
AP3B1	adaptor related protein complex 3 beta 1 subunit(AP3B1)
TBX15	T-box 15(TBX15)
RXFP1	relaxin/insulin-like family peptide receptor 1(RXFP1)
INPPL1	inositol polyphosphate phosphatase like 1(INPPL1)
VEZT	vezatin, adherens junctions transmembrane protein(VEZT)
SLIT2	slit guidance ligand 2(SLIT2)
CDR2	cerebellar degeneration related protein 2(CDR2)
MED8	mediator complex subunit 8(MED8)
ASH1L	ASH1 like histone lysine methyltransferase(ASH1L)
MOSPD2	motile sperm domain containing 2(MOSPD2)
ADAM19	ADAM metallopeptidase domain 19(ADAM19)
ORMDL3	ORMDL sphingolipid biosynthesis regulator 3(ORMDL3)
SRCAP	Snf2 related CREBBP activator protein(SRCAP)
TBX18	T-box 18(TBX18)
PRPF38B	pre-mRNA processing factor 38B(PRPF38B)
MED1	mediator complex subunit 1(MED1)
USP7	ubiquitin specific peptidase 7(USP7)
BCAT1	branched chain amino acid transaminase 1(BCAT1)
SHROOM2	shroom family member 2(SHROOM2)
USP2	ubiquitin specific peptidase 2(USP2)
FAM98A	family with sequence similarity 98 member A(FAM98A)
ABTB1	ankyrin repeat and BTB domain containing 1(ABTB1)
BDP1	B double prime 1, subunit of RNA polymerase III transcription initiation factor IIIB(BDP1)
NFS1	NFS1, cysteine desulfurase(NFS1)
XKRX	XK related, X-linked(XKRX)
COL2A1	collagen type II alpha 1 chain(COL2A1)
SUMO3	small ubiquitin-like modifier 3(SUMO3)
PRPF19	pre-mRNA processing factor 19(PRPF19)
FNDC5	fibronectin type III domain containing 5(FNDC5)
SET	SET nuclear proto-oncogene(SET)
LANCL2	LanC like 2(LANCL2)
AGO3	argonaute 3, RISC catalytic component(AGO3)
HBP1	HMG-box transcription factor 1(HBP1)
CLVS2	clavesin 2(CLVS2)
ELMOD2	ELMO domain containing 2(ELMOD2)
ELMOD1	ELMO domain containing 1(ELMOD1)
POLR3G	RNA polymerase III subunit G(POLR3G)
TRHDE	thyrotropin releasing hormone degrading enzyme(TRHDE)
CLEC2L	C-type lectin domain family 2 member L(CLEC2L)
XKR4	XK related 4(XKR4)
CEP135	centrosomal protein 135(CEP135)
XKR8	XK related 8(XKR8)
MACROD2	MACRO domain containing 2(MACROD2)
XKR7	XK related 7(XKR7)
MAPK10	mitogen-activated protein kinase 10(MAPK10)
POLR3D	polymerase (RNA) III (DNA directed) polypeptide D, 44kDa(POLR3D)
ITPR2	inositol 1,4,5-trisphosphate receptor type 2(ITPR2)
PAPOLA	poly(A) polymerase alpha(PAPOLA)
YAF2	YY1 associated factor 2(YAF2)
CDON	cell adhesion associated, oncogene regulated(CDON)
MEX3C	mex-3 RNA binding family member C(MEX3C)
PHF21B	PHD finger protein 21B(PHF21B)
PHF21A	PHD finger protein 21A(PHF21A)
NEUROD6	neuronal differentiation 6(NEUROD6)
TOB2	transducer of ERBB2, 2(TOB2)
GREB1L	growth regulation by estrogen in breast cancer 1 like(GREB1L)
TOB1	transducer of ERBB2, 1(TOB1)
FAM126A	family with sequence similarity 126 member A(FAM126A)
TP53INP1	tumor protein p53 inducible nuclear protein 1(TP53INP1)
LOR	loricrin(LOR)
NRBP1	nuclear receptor binding protein 1(NRBP1)
RNF39	ring finger protein 39(RNF39)
PI4K2B	phosphatidylinositol 4-kinase type 2 beta(PI4K2B)
MAF1	MAF1 homolog, negative regulator of RNA polymerase III(MAF1)
TBC1D19	TBC1 domain family member 19(TBC1D19)
KLHL3	kelch like family member 3(KLHL3)
PNN	pinin, desmosome associated protein(PNN)
KLHL7	kelch like family member 7(KLHL7)
TBC1D16	TBC1 domain family member 16(TBC1D16)
KLHL8	kelch like family member 8(KLHL8)
KLHL5	kelch like family member 5(KLHL5)
KLHL6	kelch like family member 6(KLHL6)
TBC1D12	TBC1 domain family member 12(TBC1D12)
TARDBP	TAR DNA binding protein(TARDBP)
LOX	lysyl oxidase(LOX)
NALCN	sodium leak channel, non-selective(NALCN)
PARD3B	par-3 family cell polarity regulator beta(PARD3B)
RNF34	ring finger protein 34(RNF34)
NEGR1	neuronal growth regulator 1(NEGR1)
PAG1	phosphoprotein membrane anchor with glycosphingolipid microdomains 1(PAG1)
SCAMP1	secretory carrier membrane protein 1(SCAMP1)
SATB1	SATB homeobox 1(SATB1)
CA12	carbonic anhydrase 12(CA12)
FUT11	fucosyltransferase 11(FUT11)
SOCS7	suppressor of cytokine signaling 7(SOCS7)
ARNTL	aryl hydrocarbon receptor nuclear translocator like(ARNTL)
NUPL2	nucleoporin like 2(NUPL2)
TBC1D22B	TBC1 domain family member 22B(TBC1D22B)
PTHLH	parathyroid hormone like hormone(PTHLH)
SLITRK1	SLIT and NTRK like family member 1(SLITRK1)
TNS3	tensin 3(TNS3)
TNS1	tensin 1(TNS1)
TIAL1	TIA1 cytotoxic granule associated RNA binding protein like 1(TIAL1)
CPD	carboxypeptidase D(CPD)
SLC38A1	solute carrier family 38 member 1(SLC38A1)
SWT1	SWT1, RNA endoribonuclease homolog(SWT1)
VPS26B	VPS26, retromer complex component B(VPS26B)
SLITRK6	SLIT and NTRK like family member 6(SLITRK6)
COL24A1	collagen type XXIV alpha 1 chain(COL24A1)
RNF20	ring finger protein 20(RNF20)
TSHZ3	teashirt zinc finger homeobox 3(TSHZ3)
PPME1	protein phosphatase methylesterase 1(PPME1)
SLC38A2	solute carrier family 38 member 2(SLC38A2)
LMBR1	limb development membrane protein 1(LMBR1)
SLC38A9	solute carrier family 38 member 9(SLC38A9)
GNE	glucosamine (UDP-N-acetyl)-2-epimerase/N-acetylmannosamine kinase(GNE)
COPZ1	coatomer protein complex subunit zeta 1(COPZ1)
ATP6V1B2	ATPase H+ transporting V1 subunit B2(ATP6V1B2)
SRC	SRC proto-oncogene, non-receptor tyrosine kinase(SRC)
HOXA5	homeobox A5(HOXA5)
CNR1	cannabinoid receptor 1(CNR1)
SLC30A4	solute carrier family 30 member 4(SLC30A4)
GALC	galactosylceramidase(GALC)
SLC30A5	solute carrier family 30 member 5(SLC30A5)
HOXA9	homeobox A9(HOXA9)
SCARB1	scavenger receptor class B member 1(SCARB1)
STRBP	spermatid perinuclear RNA binding protein(STRBP)
SLC30A3	solute carrier family 30 member 3(SLC30A3)
SLC30A6	solute carrier family 30 member 6(SLC30A6)
BEAN1	brain expressed, associated with NEDD4, 1(BEAN1)
MEST	mesoderm specific transcript(MEST)
MAFG	MAF bZIP transcription factor G(MAFG)
NADK2	NAD kinase 2, mitochondrial(NADK2)
PARD6B	par-6 family cell polarity regulator beta(PARD6B)
GABARAPL1	GABA type A receptor associated protein like 1(GABARAPL1)
TBC1D2B	TBC1 domain family member 2B(TBC1D2B)
ZMYM2	zinc finger MYM-type containing 2(ZMYM2)
LPO	lactoperoxidase(LPO)
ZMYM4	zinc finger MYM-type containing 4(ZMYM4)
CKAP4	cytoskeleton associated protein 4(CKAP4)
MAFK	v-maf musculoaponeurotic fibrosarcoma oncogene homolog K (avian)(MAFK)
HOXB2	homeobox B2(HOXB2)
TXNDC16	thioredoxin domain containing 16(TXNDC16)
HOXB5	homeobox B5(HOXB5)
HOXB6	homeobox B6(HOXB6)
RHOT1	ras homolog family member T1(RHOT1)
GPATCH1	G-patch domain containing 1(GPATCH1)
RHOT2	ras homolog family member T2(RHOT2)
PTPN1	protein tyrosine phosphatase, non-receptor type 1(PTPN1)
DIO1	deiodinase, iodothyronine type I(DIO1)
GPATCH3	G-patch domain containing 3(GPATCH3)
EIF4E2	eukaryotic translation initiation factor 4E family member 2(EIF4E2)
ST7	suppression of tumorigenicity 7(ST7)
BMI1	BMI1 proto-oncogene, polycomb ring finger(BMI1)
PRRX1	paired related homeobox 1(PRRX1)
NCS1	neuronal calcium sensor 1(NCS1)
FASLG	Fas ligand(FASLG)
DPY19L3	dpy-19 like 3 (C. elegans)(DPY19L3)
DPY19L1	dpy-19 like 1(DPY19L1)
BZW2	basic leucine zipper and W2 domains 2(BZW2)
NFATC2IP	nuclear factor of activated T-cells 2 interacting protein(NFATC2IP)
GARNL3	GTPase activating Rap/RanGAP domain like 3(GARNL3)
BZW1	basic leucine zipper and W2 domains 1(BZW1)
ARHGAP6	Rho GTPase activating protein 6(ARHGAP6)
PAK2	p21 (RAC1) activated kinase 2(PAK2)
PAK3	p21 (RAC1) activated kinase 3(PAK3)
PAK4	p21 (RAC1) activated kinase 4(PAK4)
CAMSAP1	calmodulin regulated spectrin associated protein 1(CAMSAP1)
PAK1	p21 (RAC1) activated kinase 1(PAK1)
TM9SF4	transmembrane 9 superfamily member 4(TM9SF4)
TM9SF3	transmembrane 9 superfamily member 3(TM9SF3)
KPNB1	karyopherin subunit beta 1(KPNB1)
TTC39A	tetratricopeptide repeat domain 39A(TTC39A)
KHDRBS1	KH RNA binding domain containing, signal transduction associated 1(KHDRBS1)
KHDRBS3	KH RNA binding domain containing, signal transduction associated 3(KHDRBS3)
EGR2	early growth response 2(EGR2)
SOX13	SRY-box 13(SOX13)
PIGY	phosphatidylinositol glycan anchor biosynthesis class Y(PIGY)
CILP	cartilage intermediate layer protein(CILP)
RASL12	RAS like family 12(RASL12)
SACM1L	SAC1 suppressor of actin mutations 1-like (yeast)(SACM1L)
DAPK1	death associated protein kinase 1(DAPK1)
EIF4G2	eukaryotic translation initiation factor 4 gamma, 2(EIF4G2)
CRKL	CRK like proto-oncogene, adaptor protein(CRKL)
SIKE1	suppressor of IKBKE 1(SIKE1)
HIPK1	homeodomain interacting protein kinase 1(HIPK1)
DIS3L2	DIS3 like 3'-5' exoribonuclease 2(DIS3L2)
KPNA6	karyopherin subunit alpha 6(KPNA6)
KPNA4	karyopherin subunit alpha 4(KPNA4)
SMS	spermine synthase(SMS)
SPAST	spastin(SPAST)
KPNA1	karyopherin subunit alpha 1(KPNA1)
CALCR	calcitonin receptor(CALCR)
GLTSCR1	glioma tumor suppressor candidate region gene 1(GLTSCR1)
GLRX5	glutaredoxin 5(GLRX5)
MOB1B	MOB kinase activator 1B(MOB1B)
CPM	carboxypeptidase M(CPM)
MAL2	mal, T-cell differentiation protein 2(MAL2)
CNN3	calponin 3(CNN3)
RTN4RL1	reticulon 4 receptor like 1(RTN4RL1)
PPP3R1	protein phosphatase 3 regulatory subunit B, alpha(PPP3R1)
CTNND2	catenin delta 2(CTNND2)
CTNND1	catenin delta 1(CTNND1)
SCARF1	scavenger receptor class F member 1(SCARF1)
TNFRSF1A	TNF receptor superfamily member 1A(TNFRSF1A)
SNN	stannin(SNN)
N4BP1	NEDD4 binding protein 1(N4BP1)
CDYL	chromodomain Y-like(CDYL)
MARVELD2	MARVEL domain containing 2(MARVELD2)
CYP26B1	cytochrome P450, family 26, subfamily B, polypeptide 1(CYP26B1)
BDH1	3-hydroxybutyrate dehydrogenase, type 1(BDH1)
TNPO1	transportin 1(TNPO1)
TNPO3	transportin 3(TNPO3)
PTPRB	protein tyrosine phosphatase, receptor type B(PTPRB)
ICA1	islet cell autoantigen 1(ICA1)
PTPRD	protein tyrosine phosphatase, receptor type D(PTPRD)
NCEH1	neutral cholesterol ester hydrolase 1(NCEH1)
LIPA	lipase A, lysosomal acid, cholesterol esterase(LIPA)
B3GALT1	beta-1,3-galactosyltransferase 1(B3GALT1)
CPPED1	calcineurin like phosphoesterase domain containing 1(CPPED1)
HMBOX1	homeobox containing 1(HMBOX1)
ARMC10	armadillo repeat containing 10(ARMC10)
SPARC	secreted protein acidic and cysteine rich(SPARC)
RUFY3	RUN and FYVE domain containing 3(RUFY3)
GMFB	glia maturation factor, beta(GMFB)
RNF44	ring finger protein 44(RNF44)
SON	SON DNA binding protein(SON)
SP2	Sp2 transcription factor(SP2)
MYPN	myopalladin(MYPN)
SP4	Sp4 transcription factor(SP4)
SP5	Sp5 transcription factor(SP5)
LIPH	lipase H(LIPH)
CRK	CRK proto-oncogene, adaptor protein(CRK)
NFIA	nuclear factor I A(NFIA)
RNF41	ring finger protein 41(RNF41)
SPTAN1	spectrin alpha, non-erythrocytic 1(SPTAN1)
PDP2	pyruvate dehyrogenase phosphatase catalytic subunit 2(PDP2)
CRHBP	corticotropin releasing hormone binding protein(CRHBP)
MYLIP	myosin regulatory light chain interacting protein(MYLIP)
SGMS1	sphingomyelin synthase 1(SGMS1)
GRIN3A	glutamate ionotropic receptor NMDA type subunit 3A(GRIN3A)
REST	RE1 silencing transcription factor(REST)
ITSN2	intersectin 2(ITSN2)
EPC1	enhancer of polycomb homolog 1(EPC1)
CUL5	cullin 5(CUL5)
CDH20	cadherin 20(CDH20)
HMCN1	hemicentin 1(HMCN1)
MED28	mediator complex subunit 28(MED28)
GRIN2D	glutamate ionotropic receptor NMDA type subunit 2D(GRIN2D)
PIK3CA	phosphatidylinositol-4,5-bisphosphate 3-kinase catalytic subunit alpha(PIK3CA)
CAB39	calcium binding protein 39(CAB39)
CUL1	cullin 1(CUL1)
STAG2	stromal antigen 2(STAG2)
PDPR	pyruvate dehydrogenase phosphatase regulatory subunit(PDPR)
KIF5B	kinesin family member 5B(KIF5B)
FAXDC2	fatty acid hydroxylase domain containing 2(FAXDC2)
RREB1	ras responsive element binding protein 1(RREB1)
ZNF507	zinc finger protein 507(ZNF507)
GRIN2A	glutamate ionotropic receptor NMDA type subunit 2A(GRIN2A)
OLFML2A	olfactomedin like 2A(OLFML2A)
MED13	mediator complex subunit 13(MED13)
LPCAT3	lysophosphatidylcholine acyltransferase 3(LPCAT3)
TOX3	TOX high mobility group box family member 3(TOX3)
TMEM135	transmembrane protein 135(TMEM135)
NPC1	NPC intracellular cholesterol transporter 1(NPC1)
TMEM136	transmembrane protein 136(TMEM136)
F5	coagulation factor V(F5)
MAPK6	mitogen-activated protein kinase 6(MAPK6)
RYR3	ryanodine receptor 3(RYR3)
ABAT	4-aminobutyrate aminotransferase(ABAT)
PPP2R5E	protein phosphatase 2 regulatory subunit B'epsilon(PPP2R5E)
MAPK8	mitogen-activated protein kinase 8(MAPK8)
ARL8B	ADP ribosylation factor like GTPase 8B(ARL8B)
MAPK7	mitogen-activated protein kinase 7(MAPK7)
CHORDC1	cysteine and histidine rich domain containing 1(CHORDC1)
PMP22	peripheral myelin protein 22(PMP22)
UNC13C	unc-13 homolog C(UNC13C)
RAD23B	RAD23 homolog B, nucleotide excision repair protein(RAD23B)
ZNF516	zinc finger protein 516(ZNF516)
PPP2R3A	protein phosphatase 2 regulatory subunit B''alpha(PPP2R3A)
MTX3	metaxin 3(MTX3)
MTX2	metaxin 2(MTX2)
ZNF131	zinc finger protein 131(ZNF131)
RER1	retention in endoplasmic reticulum sorting receptor 1(RER1)
SH3BP5L	SH3 binding domain protein 5 like(SH3BP5L)
SULT4A1	sulfotransferase family 4A member 1(SULT4A1)
LPCAT1	lysophosphatidylcholine acyltransferase 1(LPCAT1)
SPATS2	spermatogenesis associated serine rich 2(SPATS2)
PPP2R2B	protein phosphatase 2 regulatory subunit Bbeta(PPP2R2B)
NAT14	N-acetyltransferase 14 (putative)(NAT14)
SGIP1	SH3-domain GRB2-like (endophilin) interacting protein 1(SGIP1)
KIF3A	kinesin family member 3A(KIF3A)
NTF3	neurotrophin 3(NTF3)
ASXL1	additional sex combs like 1, transcriptional regulator(ASXL1)
COL16A1	collagen type XVI alpha 1 chain(COL16A1)
VDAC3	voltage dependent anion channel 3(VDAC3)
FAM131B	family with sequence similarity 131 member B(FAM131B)
BTBD18	BTB domain containing 18(BTBD18)
SRSF2	serine/arginine-rich splicing factor 2(SRSF2)
NLGN4X	neuroligin 4, X-linked(NLGN4X)
ARF4	ADP ribosylation factor 4(ARF4)
SMURF2	SMAD specific E3 ubiquitin protein ligase 2(SMURF2)
MAB21L3	mab-21 like 3(MAB21L3)
SMURF1	SMAD specific E3 ubiquitin protein ligase 1(SMURF1)
MAB21L1	mab-21 like 1(MAB21L1)
RERE	arginine-glutamic acid dipeptide repeats(RERE)
BTBD11	BTB domain containing 11(BTBD11)
SPIN1	spindlin 1(SPIN1)
ELF2	E74 like ETS transcription factor 2(ELF2)
SLC20A1	solute carrier family 20 member 1(SLC20A1)
ZNF532	zinc finger protein 532(ZNF532)
ELF4	E74 like ETS transcription factor 4(ELF4)
INSRR	insulin receptor related receptor(INSRR)
ST6GALNAC5	ST6 N-acetylgalactosaminide alpha-2,6-sialyltransferase 5(ST6GALNAC5)
ARL5A	ADP ribosylation factor like GTPase 5A(ARL5A)
STAC2	SH3 and cysteine rich domain 2(STAC2)
ZNF148	zinc finger protein 148(ZNF148)
MAP1LC3B	microtubule associated protein 1 light chain 3 beta(MAP1LC3B)
EEF2K	eukaryotic elongation factor 2 kinase(EEF2K)
TMEM100	transmembrane protein 100(TMEM100)
PRSS35	protease, serine 35(PRSS35)
ARL5B	ADP-ribosylation factor-like 5B(ARL5B)
PGAP2	post-GPI attachment to proteins 2(PGAP2)
KDELR2	KDEL endoplasmic reticulum protein retention receptor 2(KDELR2)
RAP2C	RAP2C, member of RAS oncogene family(RAP2C)
PAPD5	poly(A) RNA polymerase D5, non-canonical(PAPD5)
OSTM1	osteopetrosis associated transmembrane protein 1(OSTM1)
MYCN	v-myc avian myelocytomatosis viral oncogene neuroblastoma derived homolog(MYCN)
INHBB	inhibin beta B subunit(INHBB)
EPB41L3	erythrocyte membrane protein band 4.1 like 3(EPB41L3)
SS18	SS18, nBAF chromatin remodeling complex subunit(SS18)
MTMR14	myotubularin related protein 14(MTMR14)
EPB41L1	erythrocyte membrane protein band 4.1 like 1(EPB41L1)
TAF12	TATA-box binding protein associated factor 12(TAF12)
PAPD4	poly(A) RNA polymerase D4, non-canonical(PAPD4)
TAF15	TATA-box binding protein associated factor 15(TAF15)
PPEF1	protein phosphatase with EF-hand domain 1(PPEF1)
CLIC4	chloride intracellular channel 4(CLIC4)
CLIC5	chloride intracellular channel 5(CLIC5)
PYURF	PIGY upstream reading frame(PYURF)
SORT1	sortilin 1(SORT1)
OSBPL10	oxysterol binding protein like 10(OSBPL10)
OSBPL11	oxysterol binding protein-like 11(OSBPL11)
WNT9A	Wnt family member 9A(WNT9A)
ARL4C	ADP ribosylation factor like GTPase 4C(ARL4C)
PHLDB1	pleckstrin homology like domain family B member 1(PHLDB1)
ZMYND11	zinc finger MYND-type containing 11(ZMYND11)
ABI2	abl interactor 2(ABI2)
NUFIP2	NUFIP2, FMR1 interacting protein 2(NUFIP2)
ZNF174	zinc finger protein 174(ZNF174)
NHLRC3	NHL repeat containing 3(NHLRC3)
LRRTM3	leucine rich repeat transmembrane neuronal 3(LRRTM3)
LRRTM1	leucine rich repeat transmembrane neuronal 1(LRRTM1)
PPP3CB	protein phosphatase 3 catalytic subunit beta(PPP3CB)
PPP3CA	protein phosphatase 3 catalytic subunit alpha(PPP3CA)
PDHX	pyruvate dehydrogenase complex component X(PDHX)
ACSL3	acyl-CoA synthetase long-chain family member 3(ACSL3)
ZSCAN29	zinc finger and SCAN domain containing 29(ZSCAN29)
C1GALT1	core 1 synthase, glycoprotein-N-acetylgalactosamine 3-beta-galactosyltransferase 1(C1GALT1)
PHLDA1	pleckstrin homology like domain family A member 1(PHLDA1)
PDK2	pyruvate dehydrogenase kinase 2(PDK2)
UPF2	UPF2 regulator of nonsense transcripts homolog (yeast)(UPF2)
PPHLN1	periphilin 1(PPHLN1)
CS	citrate synthase(CS)
HNRNPUL2	heterogeneous nuclear ribonucleoprotein U like 2(HNRNPUL2)
PTP4A1	protein tyrosine phosphatase type IVA, member 1(PTP4A1)
SFPQ	splicing factor proline and glutamine rich(SFPQ)
KIAA1549	KIAA1549 ortholog(KIAA1549)
PHLDB3	pleckstrin homology like domain family B member 3(PHLDB3)
PHLDB2	pleckstrin homology like domain family B member 2(PHLDB2)
CDH10	cadherin 10(CDH10)
CDH11	cadherin 11(CDH11)
AKNA	AT-hook transcription factor(AKNA)
HMX2	H6 family homeobox 2(HMX2)
AP4E1	adaptor related protein complex 4 epsilon 1 subunit(AP4E1)
LMO3	LIM domain only 3(LMO3)
HBS1L	HBS1 like translational GTPase(HBS1L)
SRP19	signal recognition particle 19(SRP19)
C2CD2L	C2CD2 like(C2CD2L)
CHIC1	cysteine rich hydrophobic domain 1(CHIC1)
CSNK2A1	casein kinase 2 alpha 1(CSNK2A1)
CHIC2	cysteine-rich hydrophobic domain 2(CHIC2)
EED	embryonic ectoderm development(EED)
RALB	RAS like proto-oncogene B(RALB)
RALA	RAS like proto-oncogene A(RALA)
DNAJC3	DnaJ heat shock protein family (Hsp40) member C3(DNAJC3)
ANKZF1	ankyrin repeat and zinc finger domain containing 1(ANKZF1)
FNDC3A	fibronectin type III domain containing 3A(FNDC3A)
MTUS1	microtubule associated tumor suppressor 1(MTUS1)
ZNF592	zinc finger protein 592(ZNF592)
BEND3	BEN domain containing 3(BEND3)
STMN2	stathmin 2(STMN2)
STMN4	stathmin 4(STMN4)
GABPA	GA binding protein transcription factor alpha subunit(GABPA)
PNPLA6	patatin like phospholipase domain containing 6(PNPLA6)
PNPLA8	patatin like phospholipase domain containing 8(PNPLA8)
RELT	RELT tumor necrosis factor receptor(RELT)
MNX1	motor neuron and pancreas homeobox 1(MNX1)
NEURL4	neuralized E3 ubiquitin protein ligase 4(NEURL4)
RELN	reelin(RELN)
VAMP2	vesicle associated membrane protein 2(VAMP2)
STMN1	stathmin 1(STMN1)
TFAP2C	transcription factor AP-2 gamma(TFAP2C)
ABCA2	ATP binding cassette subfamily A member 2(ABCA2)
CNPY4	canopy FGF signaling regulator 4(CNPY4)
MAPKAPK2	mitogen-activated protein kinase-activated protein kinase 2(MAPKAPK2)
ARPC5	actin related protein 2/3 complex subunit 5(ARPC5)
TTC5	tetratricopeptide repeat domain 5(TTC5)
TTC3	tetratricopeptide repeat domain 3(TTC3)
ARNT	aryl hydrocarbon receptor nuclear translocator(ARNT)
COMMD10	COMM domain containing 10(COMMD10)
TTYH3	tweety family member 3(TTYH3)
KDELC1	KDEL (Lys-Asp-Glu-Leu) containing 1(KDELC1)
KDELC2	KDEL motif containing 2(KDELC2)
SYAP1	synapse associated protein 1(SYAP1)
TTYH2	tweety family member 2(TTYH2)
PRKRA	protein activator of interferon induced protein kinase EIF2AK2(PRKRA)
PPIL4	peptidylprolyl isomerase like 4(PPIL4)
GRID2IP	Grid2 interacting protein(GRID2IP)
ASF1A	anti-silencing function 1A histone chaperone(ASF1A)
FGD6	FYVE, RhoGEF and PH domain containing 6(FGD6)
FKTN	fukutin(FKTN)
PHACTR3	phosphatase and actin regulator 3(PHACTR3)
RAB8B	RAB8B, member RAS oncogene family(RAB8B)
PHACTR4	phosphatase and actin regulator 4(PHACTR4)
SYT10	synaptotagmin 10(SYT10)
FSCN1	fascin actin-bundling protein 1(FSCN1)
NTN4	netrin 4(NTN4)
SPRYD3	SPRY domain containing 3(SPRYD3)
TEAD1	TEA domain transcription factor 1(TEAD1)
NR4A1	nuclear receptor subfamily 4 group A member 1(NR4A1)
SPRYD7	SPRY domain containing 7(SPRYD7)
ABCB6	ATP binding cassette subfamily B member 6 (Langereis blood group)(ABCB6)
SPRYD4	SPRY domain containing 4(SPRYD4)
R3HDM2	R3H domain containing 2(R3HDM2)
DSG2	desmoglein 2(DSG2)
R3HDM4	R3H domain containing 4(R3HDM4)
FREM2	FRAS1 related extracellular matrix protein 2(FREM2)
EBF2	early B-cell factor 2(EBF2)
DSG1	desmoglein 1(DSG1)
TUBD1	tubulin delta 1(TUBD1)
FABP2	fatty acid binding protein 2(FABP2)
NAT8L	N-acetyltransferase 8 like(NAT8L)
PC	pyruvate carboxylase(PC)
IER2	immediate early response 2(IER2)
DENND5A	DENN domain containing 5A(DENND5A)
IER5	immediate early response 5(IER5)
CDC14A	cell division cycle 14A(CDC14A)
CDC14B	cell division cycle 14B(CDC14B)
NDUFAF3	NADH:ubiquinone oxidoreductase complex assembly factor 3(NDUFAF3)
SPRY3	sprouty RTK signaling antagonist 3(SPRY3)
ACOT7	acyl-CoA thioesterase 7(ACOT7)
CASP3	caspase 3(CASP3)
SLC1A2	solute carrier family 1 member 2(SLC1A2)
DENND5B	DENN domain containing 5B(DENND5B)
CASP2	caspase 2, apoptosis-related cysteine peptidase(CASP2)
SLC1A1	solute carrier family 1 member 1(SLC1A1)
SLC43A2	solute carrier family 43 member 2(SLC43A2)
KIF2A	kinesin family member 2A(KIF2A)
PPP2R1B	protein phosphatase 2 scaffold subunit Abeta(PPP2R1B)
KIF14	kinesin family member 14(KIF14)
EPN3	epsin 3(EPN3)
ZNF280C	zinc finger protein 280C(ZNF280C)
ZNF280D	zinc finger protein 280D(ZNF280D)
AVL9	AVL9 cell migration associated(AVL9)
PCDH9	protocadherin 9(PCDH9)
MAN2A1	mannosidase alpha class 2A member 1(MAN2A1)
KIF1B	kinesin family member 1B(KIF1B)
SLC35E4	solute carrier family 35 member E4(SLC35E4)
CLDN1	claudin 1(CLDN1)
CNTN4	contactin 4(CNTN4)
TXNRD1	thioredoxin reductase 1(TXNRD1)
CNTN3	contactin 3(CNTN3)
FHOD1	formin homology 2 domain containing 1(FHOD1)
PPP2R2A	protein phosphatase 2 regulatory subunit Balpha(PPP2R2A)
CRYBG3	crystallin beta-gamma domain containing 3(CRYBG3)
FKBP5	FK506 binding protein 5(FKBP5)
FSD1L	fibronectin type III and SPRY domain containing 1 like(FSD1L)
GDAP1	ganglioside induced differentiation associated protein 1(GDAP1)
EGLN1	egl-9 family hypoxia inducible factor 1(EGLN1)
GRAMD2	GRAM domain containing 2(GRAMD2)
HIC2	HIC ZBTB transcriptional repressor 2(HIC2)
COL9A1	collagen type IX alpha 1 chain(COL9A1)
FAM8A1	family with sequence similarity 8 member A1(FAM8A1)
NFATC4	nuclear factor of activated T-cells 4(NFATC4)
GTF3C2	general transcription factor IIIC subunit 2(GTF3C2)
NFATC3	nuclear factor of activated T-cells 3(NFATC3)
OLR1	oxidized low density lipoprotein receptor 1(OLR1)
KL	klotho(KL)
COL5A3	collagen type V alpha 3 chain(COL5A3)
TNFSF9	tumor necrosis factor superfamily member 9(TNFSF9)
SAMSN1	SAM domain, SH3 domain and nuclear localization signals 1(SAMSN1)
COL5A2	collagen type V alpha 2 chain(COL5A2)
COL5A1	collagen type V alpha 1 chain(COL5A1)
AJUBA	ajuba LIM protein(AJUBA)
PEX11B	peroxisomal biogenesis factor 11 beta(PEX11B)
ICK	intestinal cell kinase(ICK)
ID1	inhibitor of DNA binding 1, HLH protein(ID1)
ZBED4	zinc finger BED-type containing 4(ZBED4)
DSC2	desmocollin 2(DSC2)
DSC1	desmocollin 1(DSC1)
LUZP1	leucine zipper protein 1(LUZP1)
LPAR1	lysophosphatidic acid receptor 1(LPAR1)
TMEM17	transmembrane protein 17(TMEM17)
PRKX	protein kinase, X-linked(PRKX)
SLC35A4	solute carrier family 35 member A4(SLC35A4)
ATP2B1	ATPase plasma membrane Ca2+ transporting 1(ATP2B1)
PICALM	phosphatidylinositol binding clathrin assembly protein(PICALM)
ATP2B4	ATPase plasma membrane Ca2+ transporting 4(ATP2B4)
KIFAP3	kinesin associated protein 3(KIFAP3)
RAB24	RAB24, member RAS oncogene family(RAB24)
SCD5	stearoyl-CoA desaturase 5(SCD5)
RAB21	RAB21, member RAS oncogene family(RAB21)
PI15	peptidase inhibitor 15(PI15)
GTPBP2	GTP binding protein 2(GTPBP2)
RECK	reversion inducing cysteine rich protein with kazal motifs(RECK)
TMEM200B	transmembrane protein 200B(TMEM200B)
IFI44	interferon induced protein 44(IFI44)
AP4M1	adaptor related protein complex 4 mu 1 subunit(AP4M1)
PPARGC1A	PPARG coactivator 1 alpha(PPARGC1A)
TMEM25	transmembrane protein 25(TMEM25)
PPARGC1B	PPARG coactivator 1 beta(PPARGC1B)
FARP1	FERM, ARH/RhoGEF and pleckstrin domain protein 1(FARP1)
GLCE	glucuronic acid epimerase(GLCE)
TRAPPC13	trafficking protein particle complex 13(TRAPPC13)
LRCH1	leucine rich repeats and calponin homology domain containing 1(LRCH1)
MTF2	metal response element binding transcription factor 2(MTF2)
MLLT11	myeloid/lymphoid or mixed-lineage leukemia; translocated to, 11(MLLT11)
RAB14	RAB14, member RAS oncogene family(RAB14)
MNT	MAX network transcriptional repressor(MNT)
ATXN1L	ataxin 1 like(ATXN1L)
PRDM1	PR/SET domain 1(PRDM1)
KIF26A	kinesin family member 26A(KIF26A)
RAB10	RAB10, member RAS oncogene family(RAB10)
DBN1	drebrin 1(DBN1)
GPATCH2L	G-patch domain containing 2 like(GPATCH2L)
MFNG	MFNG O-fucosylpeptide 3-beta-N-acetylglucosaminyltransferase(MFNG)
MMD	monocyte to macrophage differentiation associated(MMD)
RIMS2	regulating synaptic membrane exocytosis 2(RIMS2)
ANGEL2	angel homolog 2(ANGEL2)
BANF1	barrier to autointegration factor 1(BANF1)
EPHB1	EPH receptor B1(EPHB1)
RIMS4	regulating synaptic membrane exocytosis 4(RIMS4)
CALU	calumenin(CALU)
RIMS3	regulating synaptic membrane exocytosis 3(RIMS3)
NRARP	NOTCH-regulated ankyrin repeat protein(NRARP)
DMD	dystrophin(DMD)
TMED10	transmembrane p24 trafficking protein 10(TMED10)
LHX6	LIM homeobox 6(LHX6)
OLFM1	olfactomedin 1(OLFM1)
TCF24	transcription factor 24(TCF24)
HIP1	huntingtin interacting protein 1(HIP1)
NKRF	NFKB repressing factor(NKRF)
KLF6	Kruppel like factor 6(KLF6)
HPCAL1	hippocalcin like 1(HPCAL1)
EIF1AD	eukaryotic translation initiation factor 1A domain containing(EIF1AD)
RYBP	RING1 and YY1 binding protein(RYBP)
CELSR2	cadherin EGF LAG seven-pass G-type receptor 2(CELSR2)
EPHA2	EPH receptor A2(EPHA2)
HN1L	hematological and neurological expressed 1-like(HN1L)
EPHA3	EPH receptor A3(EPHA3)
RNF6	ring finger protein 6(RNF6)
ATP2A2	ATPase sarcoplasmic/endoplasmic reticulum Ca2+ transporting 2(ATP2A2)
ETS1	ETS proto-oncogene 1, transcription factor(ETS1)
CNIH4	cornichon family AMPA receptor auxiliary protein 4(CNIH4)
GRK6	G protein-coupled receptor kinase 6(GRK6)
GOSR2	golgi SNAP receptor complex member 2(GOSR2)
RIT1	Ras like without CAAX 1(RIT1)
BEGAIN	brain enriched guanylate kinase associated(BEGAIN)
CLCN6	chloride voltage-gated channel 6(CLCN6)
TCF12	transcription factor 12(TCF12)
NCOR2	nuclear receptor corepressor 2(NCOR2)
KLF4	Kruppel like factor 4(KLF4)
KCNJ15	potassium voltage-gated channel subfamily J member 15(KCNJ15)
ZBTB34	zinc finger and BTB domain containing 34(ZBTB34)
FERMT2	fermitin family member 2(FERMT2)
TTLL4	tubulin tyrosine ligase like 4(TTLL4)
ZEB2	zinc finger E-box binding homeobox 2(ZEB2)
ZEB1	zinc finger E-box binding homeobox 1(ZEB1)
TTLL7	tubulin tyrosine ligase like 7(TTLL7)
RFXANK	regulatory factor X associated ankyrin containing protein(RFXANK)
KCNJ14	potassium voltage-gated channel subfamily J member 14(KCNJ14)
ZBTB38	zinc finger and BTB domain containing 38(ZBTB38)
KCNIP3	Kv channel interacting protein 3, calsenilin(KCNIP3)
TRIAP1	TP53 regulated inhibitor of apoptosis 1(TRIAP1)
HSPH1	heat shock protein family H (Hsp110) member 1(HSPH1)
GOLGA7	golgin A7(GOLGA7)
DIP2B	disco interacting protein 2 homolog B(DIP2B)
AGPAT5	1-acylglycerol-3-phosphate O-acyltransferase 5(AGPAT5)
SEH1L	SEH1 like nucleoporin(SEH1L)
TRAPPC6B	trafficking protein particle complex 6B(TRAPPC6B)
GOLGA1	golgin A1(GOLGA1)
SMCO3	single-pass membrane protein with coiled-coil domains 3(SMCO3)
RAB6B	RAB6B, member RAS oncogene family(RAB6B)
GPX7	glutathione peroxidase 7(GPX7)
AGPAT4	1-acylglycerol-3-phosphate O-acyltransferase 4(AGPAT4)
DSN1	DSN1 homolog, MIS12 kinetochore complex component(DSN1)
MBD6	methyl-CpG binding domain protein 6(MBD6)
MBD5	methyl-CpG binding domain protein 5(MBD5)
RBBP7	RB binding protein 7, chromatin remodeling factor(RBBP7)
GRM5	glutamate metabotropic receptor 5(GRM5)
AMIGO1	adhesion molecule with Ig like domain 1(AMIGO1)
RAB11FIP4	RAB11 family interacting protein 4(RAB11FIP4)
BSND	barttin CLCNK type accessory beta subunit(BSND)
WDR83OS	WD repeat domain 83 opposite strand(WDR83OS)
BLMH	bleomycin hydrolase(BLMH)
RAB11FIP2	RAB11 family interacting protein 2(RAB11FIP2)
ZDHHC17	zinc finger DHHC-type containing 17(ZDHHC17)
G6PC	glucose-6-phosphatase catalytic subunit(G6PC)
DACT1	dishevelled binding antagonist of beta catenin 1(DACT1)
RIN2	Ras and Rab interactor 2(RIN2)
MTAP	methylthioadenosine phosphorylase(MTAP)
PLA2G3	phospholipase A2 group III(PLA2G3)
REV3L	REV3 like, DNA directed polymerase zeta catalytic subunit(REV3L)
PPFIA2	PTPRF interacting protein alpha 2(PPFIA2)
RAB3C	RAB3C, member RAS oncogene family(RAB3C)
MTDH	metadherin(MTDH)
RAB3D	RAB3D, member RAS oncogene family(RAB3D)
PPFIA1	PTPRF interacting protein alpha 1(PPFIA1)
ZBTB14	zinc finger and BTB domain containing 14(ZBTB14)
EDEM3	ER degradation enhancing alpha-mannosidase like protein 3(EDEM3)
KLC2	kinesin light chain 2(KLC2)
EDEM1	ER degradation enhancing alpha-mannosidase like protein 1(EDEM1)
SPHKAP	SPHK1 interactor, AKAP domain containing(SPHKAP)
CYB561D1	cytochrome b-561 domain containing 1(CYB561D1)
ZDHHC21	zinc finger DHHC-type containing 21(ZDHHC21)
PEX19	peroxisomal biogenesis factor 19(PEX19)
ETV1	ETS variant 1(ETV1)
ETV5	ETS variant 5(ETV5)
KIF21B	kinesin family member 21B(KIF21B)
ETV4	ETS variant 4(ETV4)
BCL9	B-cell CLL/lymphoma 9(BCL9)
GDI1	GDP dissociation inhibitor 1(GDI1)
PLA2G15	phospholipase A2 group XV(PLA2G15)
PDS5B	PDS5 cohesin associated factor B(PDS5B)
YWHAB	tyrosine 3-monooxygenase/tryptophan 5-monooxygenase activation protein beta(YWHAB)
NLGN3	neuroligin 3(NLGN3)
AMBRA1	autophagy and beclin 1 regulator 1(AMBRA1)
YWHAE	tyrosine 3-monooxygenase/tryptophan 5-monooxygenase activation protein epsilon(YWHAE)
YWHAG	tyrosine 3-monooxygenase/tryptophan 5-monooxygenase activation protein gamma(YWHAG)
RAB35	RAB35, member RAS oncogene family(RAB35)
CHN1	chimerin 1(CHN1)
TMTC1	transmembrane and tetratricopeptide repeat containing 1(TMTC1)
YWHAQ	tyrosine 3-monooxygenase/tryptophan 5-monooxygenase activation protein theta(YWHAQ)
TMTC3	transmembrane and tetratricopeptide repeat containing 3(TMTC3)
RAB38	RAB38, member RAS oncogene family(RAB38)
APBB3	amyloid beta precursor protein binding family B member 3(APBB3)
TMTC2	transmembrane and tetratricopeptide repeat containing 2(TMTC2)
OCLN	occludin(OCLN)
PLXNA1	plexin A1(PLXNA1)
PLXNA2	plexin A2(PLXNA2)
EIF5B	eukaryotic translation initiation factor 5B(EIF5B)
CASK	calcium/calmodulin dependent serine protein kinase(CASK)
GDNF	glial cell derived neurotrophic factor(GDNF)
TMEM9B	TMEM9 domain family member B(TMEM9B)
ZNF182	zinc finger protein 182(ZNF182)
PAPPA	pappalysin 1(PAPPA)
ROBO1	roundabout guidance receptor 1(ROBO1)
CLP1	cleavage and polyadenylation factor I subunit 1(CLP1)
GATA4	GATA binding protein 4(GATA4)
SS18L2	SS18 like 2(SS18L2)
SMCR8	Smith-Magenis syndrome chromosome region, candidate 8(SMCR8)
NBR1	NBR1, autophagy cargo receptor(NBR1)
AKAP5	A-kinase anchoring protein 5(AKAP5)
AKAP6	A-kinase anchoring protein 6(AKAP6)
CLIP2	CAP-Gly domain containing linker protein 2(CLIP2)
NRSN1	neurensin 1(NRSN1)
ANKFY1	ankyrin repeat and FYVE domain containing 1(ANKFY1)
ASB6	ankyrin repeat and SOCS box containing 6(ASB6)
CAV3	caveolin 3(CAV3)
CAV2	caveolin 2(CAV2)
PLXNC1	plexin C1(PLXNC1)
ZC3H4	zinc finger CCCH-type containing 4(ZC3H4)
AGFG1	ArfGAP with FG repeats 1(AGFG1)
GRB2	growth factor receptor bound protein 2(GRB2)
SSH3	slingshot protein phosphatase 3(SSH3)
SSH2	slingshot protein phosphatase 2(SSH2)
CSMD3	CUB and Sushi multiple domains 3(CSMD3)
SNX1	sorting nexin 1(SNX1)
RABGAP1L	RAB GTPase activating protein 1-like(RABGAP1L)
ITGB1	integrin subunit beta 1(ITGB1)
LIN28B	lin-28 homolog B(LIN28B)
ZC3H6	zinc finger CCCH-type containing 6(ZC3H6)
CORO2A	coronin 2A(CORO2A)
MTCH2	mitochondrial carrier 2(MTCH2)
ITGB6	integrin subunit beta 6(ITGB6)
LMTK2	lemur tyrosine kinase 2(LMTK2)
RHOBTB1	Rho related BTB domain containing 1(RHOBTB1)
LMTK3	lemur tyrosine kinase 3(LMTK3)
UBAP2L	ubiquitin associated protein 2 like(UBAP2L)
TMEM198	transmembrane protein 198(TMEM198)
STK38L	serine/threonine kinase 38 like(STK38L)
TMEM97	transmembrane protein 97(TMEM97)
PODXL	podocalyxin like(PODXL)
CORO1C	coronin 1C(CORO1C)
ITGA9	integrin subunit alpha 9(ITGA9)
EIF4E	eukaryotic translation initiation factor 4E(EIF4E)
ITGA5	integrin subunit alpha 5(ITGA5)
ULK2	unc-51 like autophagy activating kinase 2(ULK2)
DNMT1	DNA methyltransferase 1(DNMT1)
RAP1A	RAP1A, member of RAS oncogene family(RAP1A)
RAP1B	RAP1B, member of RAS oncogene family(RAP1B)
MTOR	mechanistic target of rapamycin(MTOR)
CHRD	chordin(CHRD)
PHF6	PHD finger protein 6(PHF6)
HECW1	HECT, C2 and WW domain containing E3 ubiquitin protein ligase 1(HECW1)
PRKAG2	protein kinase AMP-activated non-catalytic subunit gamma 2(PRKAG2)
MRVI1	murine retrovirus integration site 1 homolog(MRVI1)
PPIP5K2	diphosphoinositol pentakisphosphate kinase 2(PPIP5K2)
IMMP2L	inner mitochondrial membrane peptidase subunit 2(IMMP2L)
RANBP9	RAN binding protein 9(RANBP9)
TMEM57	transmembrane protein 57(TMEM57)
KLHL25	kelch like family member 25(KLHL25)
ACTR1A	ARP1 actin-related protein 1 homolog A, centractin alpha(ACTR1A)
RANBP6	RAN binding protein 6(RANBP6)
DBR1	debranching RNA lariats 1(DBR1)
RANBP1	RAN binding protein 1(RANBP1)
KLHL24	kelch like family member 24(KLHL24)
KLHL23	kelch like family member 23(KLHL23)
MKL2	MKL1/myocardin like 2(MKL2)
RANBP2	RAN binding protein 2(RANBP2)
MSN	moesin(MSN)
TSKU	tsukushi, small leucine rich proteoglycan(TSKU)
PHC1	polyhomeotic homolog 1(PHC1)
CHUK	conserved helix-loop-helix ubiquitous kinase(CHUK)
ELMSAN1	ELM2 and Myb/SANT domain containing 1(ELMSAN1)
VCPIP1	valosin containing protein interacting protein 1(VCPIP1)
PHC2	polyhomeotic homolog 2(PHC2)
UBE2A	ubiquitin conjugating enzyme E2 A(UBE2A)
COL23A1	collagen type XXIII alpha 1 chain(COL23A1)
ADIPOR2	adiponectin receptor 2(ADIPOR2)
PRKCI	protein kinase C iota(PRKCI)
COX4I1	cytochrome c oxidase subunit IV isoform 1(COX4I1)
UBE2F	ubiquitin conjugating enzyme E2 F (putative)(UBE2F)
CHST3	carbohydrate (chondroitin 6) sulfotransferase 3(CHST3)
UBE2I	ubiquitin conjugating enzyme E2 I(UBE2I)
SEZ6L	seizure related 6 homolog like(SEZ6L)
PRKCE	protein kinase C epsilon(PRKCE)
LDLRAD3	low density lipoprotein receptor class A domain containing 3(LDLRAD3)
PRKCD	protein kinase C delta(PRKCD)
UBE2B	ubiquitin conjugating enzyme E2 B(UBE2B)
PRKCB	protein kinase C beta(PRKCB)
FAM134B	family with sequence similarity 134 member B(FAM134B)
EYA3	EYA transcriptional coactivator and phosphatase 3(EYA3)
UBE2N	ubiquitin-conjugating enzyme E2N(UBE2N)
MFN1	mitofusin 1(MFN1)
EYA4	EYA transcriptional coactivator and phosphatase 4(EYA4)
PRKCQ	protein kinase C theta(PRKCQ)
TMEM68	transmembrane protein 68(TMEM68)
TMEM65	transmembrane protein 65(TMEM65)
EYA1	EYA transcriptional coactivator and phosphatase 1(EYA1)
KLHL17	kelch like family member 17(KLHL17)
UBE2K	ubiquitin conjugating enzyme E2 K(UBE2K)
KLHL14	kelch like family member 14(KLHL14)
PDCL	phosducin like(PDCL)
KLHL13	kelch like family member 13(KLHL13)
COMMD2	COMM domain containing 2(COMMD2)
UBE2W	ubiquitin conjugating enzyme E2 W (putative)(UBE2W)
KLHL11	kelch like family member 11(KLHL11)
IRGQ	immunity related GTPase Q(IRGQ)
COMMD6	COMM domain containing 6(COMMD6)
MATR3	matrin 3(MATR3)
SMARCAD1	SWI/SNF-related, matrix-associated actin-dependent regulator of chromatin, subfamily a, containing DEAD/H box 1(SMARCAD1)
UBE3A	ubiquitin protein ligase E3A(UBE3A)
GPR6	G protein-coupled receptor 6(GPR6)
FAM136A	family with sequence similarity 136 member A(FAM136A)
MTM1	myotubularin 1(MTM1)
TMEM33	transmembrane protein 33(TMEM33)
FAM135B	family with sequence similarity 135 member B(FAM135B)
FAM81A	family with sequence similarity 81 member A(FAM81A)
OXCT1	3-oxoacid CoA-transferase 1(OXCT1)
SLC39A9	solute carrier family 39 member 9(SLC39A9)
SCG3	secretogranin III(SCG3)
GEMIN8	gem nuclear organelle associated protein 8(GEMIN8)
ZNF608	zinc finger protein 608(ZNF608)
GLRX	glutaredoxin(GLRX)
SLC39A1	solute carrier family 39 (zinc transporter), member 1(SLC39A1)
GLRB	glycine receptor beta(GLRB)
GEMIN2	gem nuclear organelle associated protein 2(GEMIN2)
L3MBTL3	l(3)mbt-like 3 (Drosophila)(L3MBTL3)
UBE4B	ubiquitination factor E4B(UBE4B)
TMEM169	transmembrane protein 169(TMEM169)
SIRT7	sirtuin 7(SIRT7)
SIRT1	sirtuin 1(SIRT1)
MON2	MON2 homolog, regulator of endosome-to-Golgi trafficking(MON2)
PHAX	phosphorylated adaptor for RNA export(PHAX)
TMEM163	transmembrane protein 163(TMEM163)
IRF6	interferon regulatory factor 6(IRF6)
TMEM43	transmembrane protein 43(TMEM43)
TMEM164	transmembrane protein 164(TMEM164)
DR1	down-regulator of transcription 1(DR1)
LSM12	LSM12 homolog(LSM12)
SLC5A9	solute carrier family 5 member 9(SLC5A9)
SLC5A6	solute carrier family 5 member 6(SLC5A6)
EVI5L	ecotropic viral integration site 5 like(EVI5L)
MAPK8IP1	mitogen-activated protein kinase 8 interacting protein 1(MAPK8IP1)
TMEM86A	transmembrane protein 86A(TMEM86A)
IRF4	interferon regulatory factor 4(IRF4)
SH3BP1	SH3 domain binding protein 1(SH3BP1)
KLHL32	kelch like family member 32(KLHL32)
IGFBP5	insulin like growth factor binding protein 5(IGFBP5)
ZBTB8A	zinc finger and BTB domain containing 8A(ZBTB8A)
ZNF639	zinc finger protein 639(ZNF639)
STRN	striatin(STRN)
FSTL1	follistatin like 1(FSTL1)
L1CAM	L1 cell adhesion molecule(L1CAM)
WDR82	WD repeat domain 82(WDR82)
CITED2	Cbp/p300 interacting transactivator with Glu/Asp rich carboxy-terminal domain 2(CITED2)
SSR1	signal sequence receptor subunit 1(SSR1)
BRPF1	bromodomain and PHD finger containing 1(BRPF1)
CDCA7	cell division cycle associated 7(CDCA7)
BRPF3	bromodomain and PHD finger containing 3(BRPF3)
CLK2	CDC like kinase 2(CLK2)
TIGD2	tigger transposable element derived 2(TIGD2)
TLK1	tousled-like kinase 1(TLK1)
TLK2	tousled like kinase 2(TLK2)
H1F0	H1 histone family, member 0(H1F0)
MAGI3	membrane associated guanylate kinase, WW and PDZ domain containing 3(MAGI3)
WNT10B	Wnt family member 10B(WNT10B)
ZNF644	zinc finger protein 644(ZNF644)
MPDZ	multiple PDZ domain crumbs cell polarity complex component(MPDZ)
RXRB	retinoid X receptor beta(RXRB)
ROCK2	Rho associated coiled-coil containing protein kinase 2(ROCK2)
RXRA	retinoid X receptor alpha(RXRA)
TTC7B	tetratricopeptide repeat domain 7B(TTC7B)
TADA2B	transcriptional adaptor 2B(TADA2B)
COLEC12	collectin subfamily member 12(COLEC12)
LHFP	lipoma HMGIC fusion partner(LHFP)
PPP1R3A	protein phosphatase 1 regulatory subunit 3A(PPP1R3A)
SSPN	sarcospan(SSPN)
ERGIC1	endoplasmic reticulum-golgi intermediate compartment 1(ERGIC1)
ERGIC2	ERGIC and golgi 2(ERGIC2)
NME6	NME/NM23 nucleoside diphosphate kinase 6(NME6)
PITPNM3	PITPNM family member 3(PITPNM3)
UBL4A	ubiquitin like 4A(UBL4A)
TGIF2	TGFB induced factor homeobox 2(TGIF2)
GRAP2	GRB2-related adaptor protein 2(GRAP2)
MYO18A	myosin XVIIIA(MYO18A)
CCDC96	coiled-coil domain containing 96(CCDC96)
ERBB4	erb-b2 receptor tyrosine kinase 4(ERBB4)
CCDC93	coiled-coil domain containing 93(CCDC93)
HMGCS1	3-hydroxy-3-methylglutaryl-CoA synthase 1(HMGCS1)
DTD2	D-tyrosyl-tRNA deacylase 2 (putative)(DTD2)
DAAM1	dishevelled associated activator of morphogenesis 1(DAAM1)
DAAM2	dishevelled associated activator of morphogenesis 2(DAAM2)
ADCYAP1	adenylate cyclase activating polypeptide 1(ADCYAP1)
PPP1R3D	protein phosphatase 1 regulatory subunit 3D(PPP1R3D)
ZDHHC9	zinc finger DHHC-type containing 9(ZDHHC9)
RCHY1	ring finger and CHY zinc finger domain containing 1(RCHY1)
DNMT3B	DNA methyltransferase 3 beta(DNMT3B)
MGAT4B	mannosyl (alpha-1,3-)-glycoprotein beta-1,4-N-acetylglucosaminyltransferase, isozyme B(MGAT4B)
MGAT4A	mannosyl (alpha-1,3-)-glycoprotein beta-1,4-N-acetylglucosaminyltransferase, isozyme A(MGAT4A)
RASEF	RAS and EF-hand domain containing(RASEF)
CCDC82	coiled-coil domain containing 82(CCDC82)
MPC1	mitochondrial pyruvate carrier 1(MPC1)
PCNP	PEST proteolytic signal containing nuclear protein(PCNP)
DLAT	dihydrolipoamide S-acetyltransferase(DLAT)
PCDH17	protocadherin 17(PCDH17)
KCNK2	potassium two pore domain channel subfamily K member 2(KCNK2)
PCDH18	protocadherin 18(PCDH18)
ZNF629	zinc finger protein 629(ZNF629)
RPE	ribulose-5-phosphate-3-epimerase(RPE)
PTAR1	protein prenyltransferase alpha subunit repeat containing 1(PTAR1)
FNBP4	formin binding protein 4(FNBP4)
DEPTOR	DEP domain containing MTOR-interacting protein(DEPTOR)
MARCKS	myristoylated alanine rich protein kinase C substrate(MARCKS)
ZNF385B	zinc finger protein 385B(ZNF385B)
H3F3B	H3 histone, family 3B(H3F3B)
TMEM41B	transmembrane protein 41B(TMEM41B)
ZNF385A	zinc finger protein 385A(ZNF385A)
CD200	CD200 molecule(CD200)
TLL1	tolloid like 1(TLL1)
DPP3	dipeptidyl peptidase 3(DPP3)
RTN4	reticulon 4(RTN4)
ENOX2	ecto-NOX disulfide-thiol exchanger 2(ENOX2)
PDIA3	protein disulfide isomerase family A member 3(PDIA3)
RNPEPL1	arginyl aminopeptidase like 1(RNPEPL1)
SYNJ1	synaptojanin 1(SYNJ1)
NAP1L1	nucleosome assembly protein 1 like 1(NAP1L1)
RASSF8	Ras association domain family member 8(RASSF8)
ZNF10	zinc finger protein 10(ZNF10)
NAP1L2	nucleosome assembly protein 1 like 2(NAP1L2)
NAP1L5	nucleosome assembly protein 1 like 5(NAP1L5)
RTN1	reticulon 1(RTN1)
LATS2	large tumor suppressor kinase 2(LATS2)
AP1S2	adaptor related protein complex 1 sigma 2 subunit(AP1S2)
PBXIP1	PBX homeobox interacting protein 1(PBXIP1)
SERTAD3	SERTA domain containing 3(SERTAD3)
KIAA1033	KIAA1033 ortholog(KIAA1033)
SERTAD4	SERTA domain containing 4(SERTAD4)
DPP8	dipeptidyl peptidase 8(DPP8)
ZC3HAV1L	zinc finger CCCH-type containing, antiviral 1 like(ZC3HAV1L)
DPP9	dipeptidyl peptidase 9(DPP9)
MBLAC2	metallo-beta-lactamase domain containing 2(MBLAC2)
WDR33	WD repeat domain 33(WDR33)
SERTAD2	SERTA domain containing 2(SERTAD2)
TTC33	tetratricopeptide repeat domain 33(TTC33)
ZNF282	zinc finger protein 282(ZNF282)
STX3	syntaxin 3(STX3)
KIAA1841	KIAA1841 ortholog(KIAA1841)
ZDHHC6	zinc finger DHHC-type containing 6(ZDHHC6)
CCDC178	coiled-coil domain containing 178(CCDC178)
MICAL3	microtubule associated monooxygenase, calponin and LIM domain containing 3(MICAL3)
KCTD21	potassium channel tetramerization domain containing 21(KCTD21)
TLE3	transducin like enhancer of split 3(TLE3)
KCTD20	potassium channel tetramerization domain containing 20(KCTD20)
ZNF687	zinc finger protein 687(ZNF687)
PLEKHH1	pleckstrin homology, MyTH4 and FERM domain containing H1(PLEKHH1)
MAPK1IP1L	mitogen-activated protein kinase 1 interacting protein 1 like(MAPK1IP1L)
MXD1	MAX dimerization protein 1(MXD1)
MXD3	MAX dimerization protein 3(MXD3)
ARVCF	armadillo repeat gene deleted in velocardiofacial syndrome(ARVCF)
ZNF691	zinc finger protein 691(ZNF691)
NAB1	NGFI-A binding protein 1(NAB1)
KIAA1024	KIAA1024 ortholog(KIAA1024)
CAND2	cullin associated and neddylation dissociated 2 (putative)(CAND2)
KCNH7	potassium voltage-gated channel subfamily H member 7(KCNH7)
CHSY1	chondroitin sulfate synthase 1(CHSY1)
CAND1	cullin associated and neddylation dissociated 1(CAND1)
KCNH4	potassium voltage-gated channel subfamily H member 4(KCNH4)
RASD2	RASD family member 2(RASD2)
ZNF275	zinc finger protein 275(ZNF275)
NACA	nascent polypeptide-associated complex alpha subunit(NACA)
EEA1	early endosome antigen 1(EEA1)
DGKA	diacylglycerol kinase alpha(DGKA)
PCSK2	proprotein convertase subtilisin/kexin type 2(PCSK2)
PLEKHG3	pleckstrin homology and RhoGEF domain containing G3(PLEKHG3)
UNC79	unc-79 homolog (C. elegans)(UNC79)
PLEKHG1	pleckstrin homology and RhoGEF domain containing G1(PLEKHG1)
EZR	ezrin(EZR)
DGKD	diacylglycerol kinase delta(DGKD)
PLA2G12A	phospholipase A2 group XIIA(PLA2G12A)
REXO2	RNA exonuclease 2(REXO2)
PPP2CB	protein phosphatase 2 catalytic subunit beta(PPP2CB)
GALNT15	polypeptide N-acetylgalactosaminyltransferase 15(GALNT15)
PCSK7	proprotein convertase subtilisin/kexin type 7(PCSK7)
GALNT11	polypeptide N-acetylgalactosaminyltransferase 11(GALNT11)
FBXW11	F-box and WD repeat domain containing 11(FBXW11)
RASA2	RAS p21 protein activator 2(RASA2)
GALNT14	polypeptide N-acetylgalactosaminyltransferase 14(GALNT14)
TTC13	tetratricopeptide repeat domain 13(TTC13)
PPP1R18	protein phosphatase 1 regulatory subunit 18(PPP1R18)
HAPLN1	hyaluronan and proteoglycan link protein 1(HAPLN1)
AMACR	alpha-methylacyl-CoA racemase(AMACR)
COL15A1	collagen type XV alpha 1 chain(COL15A1)
ZNF24	zinc finger protein 24(ZNF24)
PPP1R10	protein phosphatase 1 regulatory subunit 10(PPP1R10)
ELAVL1	ELAV like RNA binding protein 1(ELAVL1)
DGKH	diacylglycerol kinase eta(DGKH)
NID1	nidogen 1(NID1)
ELAVL2	ELAV like RNA binding protein 2(ELAVL2)
ELAVL4	ELAV like RNA binding protein 4(ELAVL4)
SGTB	small glutamine rich tetratricopeptide repeat containing beta(SGTB)
RLF	rearranged L-myc fusion(RLF)
WDR26	WD repeat domain 26(WDR26)
GFRA1	GDNF family receptor alpha 1(GFRA1)
DGKZ	diacylglycerol kinase zeta(DGKZ)
ZBTB5	zinc finger and BTB domain containing 5(ZBTB5)
HBEGF	heparin binding EGF like growth factor(HBEGF)
NR5A2	nuclear receptor subfamily 5 group A member 2(NR5A2)
GFRA2	GDNF family receptor alpha 2(GFRA2)
SSR3	signal sequence receptor subunit 3(SSR3)
ASPN	asporin(ASPN)
RNMT	RNA guanine-7 methyltransferase(RNMT)
[truncated: 558 more rows]

## Sheet: Table S3b
Table S3b. The genes targeted by upregulated miRNAs.
OFFICIAL_GENE_SYMBOL
From	Gene Name
MEF2C	myocyte enhancer factor 2C(MEF2C)
RBPMS2	RNA binding protein with multiple splicing 2(RBPMS2)
GDA	guanine deaminase(GDA)
MEF2A	myocyte enhancer factor 2A(MEF2A)
SCN3A	sodium voltage-gated channel alpha subunit 3(SCN3A)
SCN3B	sodium voltage-gated channel beta subunit 3(SCN3B)
VPS54	VPS54, GARP complex subunit(VPS54)
RORA	RAR related orphan receptor A(RORA)
AMOTL1	angiomotin like 1(AMOTL1)
ZNF777	zinc finger protein 777(ZNF777)
MAP3K9	mitogen-activated protein kinase kinase kinase 9(MAP3K9)
MAP3K8	mitogen-activated protein kinase kinase kinase 8(MAP3K8)
FOXF2	forkhead box F2(FOXF2)
VPS4B	vacuolar protein sorting 4 homolog B (S. cerevisiae)(VPS4B)
VPS4A	vacuolar protein sorting 4 homolog A(VPS4A)
ZNF395	zinc finger protein 395(ZNF395)
PTBP2	polypyrimidine tract binding protein 2(PTBP2)
TBPL1	TATA-box binding protein like 1(TBPL1)
CCAR1	cell division cycle and apoptosis regulator 1(CCAR1)
NDNL2	necdin-like 2(NDNL2)
EFCAB14	EF-hand calcium binding domain 14(EFCAB14)
VPS45	vacuolar protein sorting 45 homolog(VPS45)
SIPA1L2	signal induced proliferation associated 1 like 2(SIPA1L2)
BTBD7	BTB domain containing 7(BTBD7)
UBE2J1	ubiquitin conjugating enzyme E2 J1(UBE2J1)
EOMES	eomesodermin(EOMES)
GEM	GTP binding protein overexpressed in skeletal muscle(GEM)
MARK2	microtubule affinity regulating kinase 2(MARK2)
DCAF6	DDB1 and CUL4 associated factor 6(DCAF6)
RCC2	regulator of chromosome condensation 2(RCC2)
SCYL2	SCY1 like pseudokinase 2(SCYL2)
ROR1	receptor tyrosine kinase like orphan receptor 1(ROR1)
SCN1A	sodium voltage-gated channel alpha subunit 1(SCN1A)
RALGPS2	Ral GEF with PH domain and SH3 binding motif 2(RALGPS2)
GSTCD	glutathione S-transferase C-terminal domain containing(GSTCD)
CACNB3	calcium voltage-gated channel auxiliary subunit beta 3(CACNB3)
FAM19A1	family with sequence similarity 19 member A1, C-C motif chemokine like(FAM19A1)
MYBL1	MYB proto-oncogene like 1(MYBL1)
MYBL2	MYB proto-oncogene like 2(MYBL2)
FAM19A5	family with sequence similarity 19 member A5, C-C motif chemokine like(FAM19A5)
ARIH1	ariadne RBR E3 ubiquitin protein ligase 1(ARIH1)
ARIH2	ariadne RBR E3 ubiquitin protein ligase 2(ARIH2)
PFN2	profilin 2(PFN2)
KBTBD2	kelch repeat and BTB domain containing 2(KBTBD2)
KBTBD8	kelch repeat and BTB domain containing 8(KBTBD8)
EFR3A	EFR3 homolog A(EFR3A)
FAIM	Fas apoptotic inhibitory molecule(FAIM)
DHX58	DExH-box helicase 58(DHX58)
ZNF398	zinc finger protein 398(ZNF398)
SPPL3	signal peptide peptidase like 3(SPPL3)
ARHGEF37	Rho guanine nucleotide exchange factor 37(ARHGEF37)
PAIP1	poly(A) binding protein interacting protein 1(PAIP1)
TAOK3	TAO kinase 3(TAOK3)
SZRD1	SUZ RNA binding domain containing 1(SZRD1)
ATP11B	ATPase phospholipid transporting 11B (putative)(ATP11B)
ATP11A	ATPase phospholipid transporting 11A(ATP11A)
ATP11C	ATPase phospholipid transporting 11C(ATP11C)
SFMBT1	Scm-like with four mbt domains 1(SFMBT1)
USF2	upstream transcription factor 2, c-fos interacting(USF2)
FNIP1	folliculin interacting protein 1(FNIP1)
KIAA2026	KIAA2026 ortholog(KIAA2026)
FNIP2	folliculin interacting protein 2(FNIP2)
BFAR	bifunctional apoptosis regulator(BFAR)
AIDA	axin interactor, dorsalization associated(AIDA)
LASP1	LIM and SH3 protein 1(LASP1)
PARP8	poly(ADP-ribose) polymerase family member 8(PARP8)
PKP4	plakophilin 4(PKP4)
RGS6	regulator of G-protein signaling 6(RGS6)
NXPE3	neurexophilin and PC-esterase domain family member 3(NXPE3)
NUAK1	NUAK family kinase 1(NUAK1)
GRIP1	glutamate receptor interacting protein 1(GRIP1)
TSG101	tumor susceptibility 101(TSG101)
ZNFX1	zinc finger NFX1-type containing 1(ZNFX1)
GNPNAT1	glucosamine-phosphate N-acetyltransferase 1(GNPNAT1)
EZH1	enhancer of zeste 1 polycomb repressive complex 2 subunit(EZH1)
U2SURP	U2 snRNP associated SURP domain containing(U2SURP)
EZH2	enhancer of zeste 2 polycomb repressive complex 2 subunit(EZH2)
AUH	AU RNA binding methylglutaconyl-CoA hydratase(AUH)
MMP24	matrix metallopeptidase 24(MMP24)
SMAP2	small ArfGAP2(SMAP2)
ANP32A	acidic nuclear phosphoprotein 32 family member A(ANP32A)
SPIB	Spi-B transcription factor(SPIB)
USP16	ubiquitin specific peptidase 16(USP16)
CCDC28A	coiled-coil domain containing 28A(CCDC28A)
USP14	ubiquitin specific peptidase 14(USP14)
USP13	ubiquitin specific peptidase 13 (isopeptidase T-3)(USP13)
GHR	growth hormone receptor(GHR)
GAPT	GRB2 binding adaptor protein, transmembrane(GAPT)
ATF7IP	activating transcription factor 7 interacting protein(ATF7IP)
BRF2	BRF2, RNA polymerase III transcription initiation factor 50 kDa subunit(BRF2)
PIK3C2B	phosphatidylinositol-4-phosphate 3-kinase catalytic subunit type 2 beta(PIK3C2B)
CACNG4	calcium voltage-gated channel auxiliary subunit gamma 4(CACNG4)
IL6R	interleukin 6 receptor(IL6R)
ARHGEF12	Rho guanine nucleotide exchange factor 12(ARHGEF12)
NDNF	neuron derived neurotrophic factor(NDNF)
ARHGEF11	Rho guanine nucleotide exchange factor 11(ARHGEF11)
RNF180	ring finger protein 180(RNF180)
USP28	ubiquitin specific peptidase 28(USP28)
BRWD1	bromodomain and WD repeat domain containing 1(BRWD1)
PLXDC2	plexin domain containing 2(PLXDC2)
EIF4A1	eukaryotic translation initiation factor 4A1(EIF4A1)
DOLPP1	dolichyldiphosphatase 1(DOLPP1)
SNAP29	synaptosome associated protein 29(SNAP29)
SCML4	sex comb on midleg-like 4 (Drosophila)(SCML4)
MIDN	midnolin(MIDN)
USP30	ubiquitin specific peptidase 30(USP30)
ALDH18A1	aldehyde dehydrogenase 18 family member A1(ALDH18A1)
APC2	APC2, WNT signaling pathway regulator(APC2)
ECEL1	endothelin converting enzyme like 1(ECEL1)
LRRC32	leucine rich repeat containing 32(LRRC32)
SCML2	sex comb on midleg-like 2 (Drosophila)(SCML2)
CSF1	colony stimulating factor 1(CSF1)
SCML1	sex comb on midleg-like 1 (Drosophila)(SCML1)
MKNK2	MAP kinase interacting serine/threonine kinase 2(MKNK2)
ZNF367	zinc finger protein 367(ZNF367)
ERI1	exoribonuclease 1(ERI1)
ABHD3	abhydrolase domain containing 3(ABHD3)
ZNF75A	zinc finger protein 75a(ZNF75A)
ABHD2	abhydrolase domain containing 2(ABHD2)
ZNF365	zinc finger protein 365(ZNF365)
IGSF10	immunoglobulin superfamily member 10(IGSF10)
MTMR2	myotubularin related protein 2(MTMR2)
MTMR3	myotubularin related protein 3(MTMR3)
SORBS1	sorbin and SH3 domain containing 1(SORBS1)
SORBS2	sorbin and SH3 domain containing 2(SORBS2)
ANKS6	ankyrin repeat and sterile alpha motif domain containing 6(ANKS6)
PKD2	polycystin 2, transient receptor potential cation channel(PKD2)
USP36	ubiquitin specific peptidase 36(USP36)
ARMCX1	armadillo repeat containing, X-linked 1(ARMCX1)
GK5	glycerol kinase 5 (putative)(GK5)
MTMR9	myotubularin related protein 9(MTMR9)
USP34	ubiquitin specific peptidase 34(USP34)
PTX3	pentraxin 3(PTX3)
SNAP25	synaptosome associated protein 25(SNAP25)
USP33	ubiquitin specific peptidase 33(USP33)
USP32	ubiquitin specific peptidase 32(USP32)
MTMR4	myotubularin related protein 4(MTMR4)
BRD1	bromodomain containing 1(BRD1)
LRRC40	leucine rich repeat containing 40(LRRC40)
BRD2	bromodomain containing 2(BRD2)
RNF19A	ring finger protein 19A, RBR E3 ubiquitin protein ligase(RNF19A)
NUCKS1	nuclear casein kinase and cyclin dependent kinase substrate 1(NUCKS1)
ZNF770	zinc finger protein 770(ZNF770)
ATRN	attractin(ATRN)
IGF1	insulin like growth factor 1(IGF1)
FSD1	fibronectin type III and SPRY domain containing 1(FSD1)
MEF2D	myocyte enhancer factor 2D(MEF2D)
PHF19	PHD finger protein 19(PHF19)
DUSP2	dual specificity phosphatase 2(DUSP2)
PLSCR4	phospholipid scramblase 4(PLSCR4)
ZNF362	zinc finger protein 362(ZNF362)
BNC2	basonuclin 2(BNC2)
LRRC3B	leucine rich repeat containing 3B(LRRC3B)
WHSC1L1	Wolf-Hirschhorn syndrome candidate 1-like 1(WHSC1L1)
LRP6	LDL receptor related protein 6(LRP6)
FAM155B	family with sequence similarity 155 member B(FAM155B)
USP46	ubiquitin specific peptidase 46(USP46)
SECISBP2L	SECIS binding protein 2 like(SECISBP2L)
LRP8	LDL receptor related protein 8(LRP8)
LRP2	LDL receptor related protein 2(LRP2)
DUSP9	dual specificity phosphatase 9(DUSP9)
USP42	ubiquitin specific peptidase 42(USP42)
DUSP8	dual specificity phosphatase 8(DUSP8)
USP45	ubiquitin specific peptidase 45(USP45)
LRP4	LDL receptor related protein 4(LRP4)
DUSP6	dual specificity phosphatase 6(DUSP6)
GNA14	G protein subunit alpha 14(GNA14)
ENAH	enabled homolog (Drosophila)(ENAH)
SRCIN1	SRC kinase signaling inhibitor 1(SRCIN1)
GNA12	G protein subunit alpha 12(GNA12)
TGFB3	transforming growth factor beta 3(TGFB3)
LRRC4C	leucine rich repeat containing 4C(LRRC4C)
KIAA1328	KIAA1328 ortholog(KIAA1328)
RGL1	ral guanine nucleotide dissociation stimulator like 1(RGL1)
PACSIN1	protein kinase C and casein kinase substrate in neurons 1(PACSIN1)
NUDCD2	NudC domain containing 2(NUDCD2)
CDKN2C	cyclin dependent kinase inhibitor 2C(CDKN2C)
TGFBI	transforming growth factor beta induced(TGFBI)
FBXO28	F-box protein 28(FBXO28)
LRRC59	leucine rich repeat containing 59(LRRC59)
LRRC55	leucine rich repeat containing 55(LRRC55)
FBXO21	F-box protein 21(FBXO21)
SAMD4A	sterile alpha motif domain containing 4A(SAMD4A)
RNF145	ring finger protein 145(RNF145)
SAMD4B	sterile alpha motif domain containing 4B(SAMD4B)
NET1	neuroepithelial cell transforming 1(NET1)
TMEM167B	transmembrane protein 167B(TMEM167B)
PTPRN2	protein tyrosine phosphatase, receptor type N2(PTPRN2)
FMR1	fragile X mental retardation 1(FMR1)
ANKRD33B	ankyrin repeat domain 33B(ANKRD33B)
TACC2	transforming acidic coiled-coil containing protein 2(TACC2)
OTUD3	OTU deubiquitinase 3(OTUD3)
HIF1A	hypoxia inducible factor 1 alpha subunit(HIF1A)
EP300	E1A binding protein p300(EP300)
UBFD1	ubiquitin family domain containing 1(UBFD1)
DTWD2	DTW domain containing 2(DTWD2)
SNTG1	syntrophin gamma 1(SNTG1)
DCUN1D3	defective in cullin neddylation 1 domain containing 3(DCUN1D3)
SMARCA2	SWI/SNF related, matrix associated, actin dependent regulator of chromatin, subfamily a, member 2(SMARCA2)
DCUN1D4	defective in cullin neddylation 1 domain containing 4(DCUN1D4)
MAMDC2	MAM domain containing 2(MAMDC2)
ADAMTSL3	ADAMTS like 3(ADAMTSL3)
GLUD1	glutamate dehydrogenase 1(GLUD1)
BMPR2	bone morphogenetic protein receptor type 2(BMPR2)
CERS5	ceramide synthase 5(CERS5)
UBE2V1	ubiquitin conjugating enzyme E2 V1(UBE2V1)
UBE2V2	ubiquitin-conjugating enzyme E2 variant 2(UBE2V2)
ST8SIA3	ST8 alpha-N-acetyl-neuraminide alpha-2,8-sialyltransferase 3(ST8SIA3)
ATF1	activating transcription factor 1(ATF1)
EPM2AIP1	EPM2A interacting protein 1(EPM2AIP1)
NR2C1	nuclear receptor subfamily 2 group C member 1(NR2C1)
PRUNE2	prune homolog 2(PRUNE2)
FICD	FIC domain containing(FICD)
MIA3	MIA family member 3, ER export factor(MIA3)
RNF165	ring finger protein 165(RNF165)
TFEC	transcription factor EC(TFEC)
TDRKH	tudor and KH domain containing(TDRKH)
SCN9A	sodium channel, voltage-gated, type IX, alpha subunit(SCN9A)
AUTS2	autism susceptibility candidate 2(AUTS2)
FBXW2	F-box and WD repeat domain containing 2(FBXW2)
UNKL	unkempt family like zinc finger(UNKL)
AP2M1	adaptor related protein complex 2 mu 1 subunit(AP2M1)
MYO1C	myosin IC(MYO1C)
MYO1B	myosin IB(MYO1B)
MYO1D	myosin ID(MYO1D)
SPPL2A	signal peptide peptidase like 2A(SPPL2A)
ICMT	isoprenylcysteine carboxyl methyltransferase(ICMT)
ATP7A	ATPase copper transporting alpha(ATP7A)
PAGR1	PAXIP1 associated glutamate rich protein 1(PAGR1)
THSD7A	thrombospondin type 1 domain containing 7A(THSD7A)
LAMP1	lysosomal associated membrane protein 1(LAMP1)
LAMP2	lysosomal associated membrane protein 2(LAMP2)
HDAC1	histone deacetylase 1(HDAC1)
LAMP5	lysosomal associated membrane protein family member 5(LAMP5)
SMARCC1	SWI/SNF related, matrix associated, actin dependent regulator of chromatin subfamily c member 1(SMARCC1)
DYRK1B	dual specificity tyrosine phosphorylation regulated kinase 1B(DYRK1B)
SMARCC2	SWI/SNF related, matrix associated, actin dependent regulator of chromatin subfamily c member 2(SMARCC2)
FBXO31	F-box protein 31(FBXO31)
FBXO32	F-box protein 32(FBXO32)
SCN8A	sodium voltage-gated channel alpha subunit 8(SCN8A)
MYO19	myosin XIX(MYO19)
PDZD2	PDZ domain containing 2(PDZD2)
HDAC9	histone deacetylase 9(HDAC9)
SLC45A3	solute carrier family 45 member 3(SLC45A3)
E2F1	E2F transcription factor 1(E2F1)
NXPH2	neurexophilin 2(NXPH2)
E2F3	E2F transcription factor 3(E2F3)
SLC45A4	solute carrier family 45 member 4(SLC45A4)
PREX1	phosphatidylinositol-3,4,5-trisphosphate dependent Rac exchange factor 1(PREX1)
E2F7	E2F transcription factor 7(E2F7)
LRRC8D	leucine rich repeat containing 8 family member D(LRRC8D)
OGDHL	oxoglutarate dehydrogenase-like(OGDHL)
ATL3	atlastin GTPase 3(ATL3)
GABBR2	gamma-aminobutyric acid type B receptor subunit 2(GABBR2)
TMF1	TATA element modulatory factor 1(TMF1)
OSR1	odd-skipped related transciption factor 1(OSR1)
PAX9	paired box 9(PAX9)
FSIP1	fibrous sheath interacting protein 1(FSIP1)
SNTB1	syntrophin beta 1(SNTB1)
SNTB2	syntrophin beta 2(SNTB2)
ZCCHC6	zinc finger CCHC-type containing 6(ZCCHC6)
IMPDH1	inosine monophosphate dehydrogenase 1(IMPDH1)
APLN	apelin(APLN)
INO80C	INO80 complex subunit C(INO80C)
NXPH1	neurexophilin 1(NXPH1)
TBL1XR1	transducin beta like 1 X-linked receptor 1(TBL1XR1)
PKN2	protein kinase N2(PKN2)
STXBP3	syntaxin binding protein 3(STXBP3)
EDAR	ectodysplasin A receptor(EDAR)
TMEM38B	transmembrane protein 38B(TMEM38B)
SLC41A2	solute carrier family 41 member 2(SLC41A2)
SLC41A1	solute carrier family 41 member 1(SLC41A1)
WASL	Wiskott-Aldrich syndrome like(WASL)
MAPRE1	microtubule associated protein RP/EB family member 1(MAPRE1)
SNX12	sorting nexin 12(SNX12)
SNX13	sorting nexin 13(SNX13)
MAPRE3	microtubule associated protein RP/EB family member 3(MAPRE3)
SNX10	sorting nexin 10(SNX10)
UGP2	UDP-glucose pyrophosphorylase 2(UGP2)
UBAP1	ubiquitin associated protein 1(UBAP1)
HS3ST5	heparan sulfate-glucosamine 3-sulfotransferase 5(HS3ST5)
FRYL	FRY like transcription coactivator(FRYL)
ANKRD34A	ankyrin repeat domain 34A(ANKRD34A)
SSFA2	sperm specific antigen 2(SSFA2)
ARID2	AT-rich interaction domain 2(ARID2)
RNF125	ring finger protein 125(RNF125)
L3HYPDH	trans-L-3-hydroxyproline dehydratase(L3HYPDH)
ISLR	immunoglobulin superfamily containing leucine rich repeat(ISLR)
SEC16A	SEC16 homolog A, endoplasmic reticulum export factor(SEC16A)
RNF128	ring finger protein 128, E3 ubiquitin protein ligase(RNF128)
EHD1	EH domain containing 1(EHD1)
CD6	CD6 molecule(CD6)
UBTD2	ubiquitin domain containing 2(UBTD2)
VPS39	VPS39, HOPS complex subunit(VPS39)
DCLK1	doublecortin like kinase 1(DCLK1)
EHD3	EH domain containing 3(EHD3)
EHD4	EH domain containing 4(EHD4)
CEBPA	CCAAT/enhancer binding protein alpha(CEBPA)
COBLL1	cordon-bleu WH2 repeat protein like 1(COBLL1)
CNNM2	cyclin and CBS domain divalent metal cation transport mediator 2(CNNM2)
WDFY3	WD repeat and FYVE domain containing 3(WDFY3)
WDFY1	WD repeat and FYVE domain containing 1(WDFY1)
SNX25	sorting nexin 25(SNX25)
GRSF1	G-rich RNA sequence binding factor 1(GRSF1)
UBE2Q2	ubiquitin conjugating enzyme E2 Q2(UBE2Q2)
SLBP	stem-loop binding protein(SLBP)
HSP90B1	heat shock protein 90 beta family member 1(HSP90B1)
CUL4A	cullin 4A(CUL4A)
FAF2	Fas associated factor family member 2(FAF2)
CUL4B	cullin 4B(CUL4B)
SNX33	sorting nexin 33(SNX33)
MESP1	mesoderm posterior bHLH transcription factor 1(MESP1)
SNX30	sorting nexin family member 30(SNX30)
ALKBH5	alkB homolog 5, RNA demethylase(ALKBH5)
GCA	grancalcin(GCA)
RNF111	ring finger protein 111(RNF111)
CADM3	cell adhesion molecule 3(CADM3)
PRR16	proline rich 16(PRR16)
PRR15	proline rich 15(PRR15)
IL6ST	interleukin 6 signal transducer(IL6ST)
CADM2	cell adhesion molecule 2(CADM2)
THOP1	thimet oligopeptidase 1(THOP1)
NELL1	neural EGFL like 1(NELL1)
FAM110C	family with sequence similarity 110 member C(FAM110C)
EDN1	endothelin 1(EDN1)
FAM110B	family with sequence similarity 110 member B(FAM110B)
BBX	BBX, HMG-box containing(BBX)
PPCS	phosphopantothenoylcysteine synthetase(PPCS)
DNAJB13	DnaJ heat shock protein family (Hsp40) member B13(DNAJB13)
SIDT1	SID1 transmembrane family member 1(SIDT1)
CCT3	chaperonin containing TCP1 subunit 3(CCT3)
SIDT2	SID1 transmembrane family member 2(SIDT2)
MEGF11	multiple EGF like domains 11(MEGF11)
ZFP91	ZFP91 zinc finger protein(ZFP91)
GBF1	golgi brefeldin A resistant guanine nucleotide exchange factor 1(GBF1)
WWP2	WW domain containing E3 ubiquitin protein ligase 2(WWP2)
WWP1	WW domain containing E3 ubiquitin protein ligase 1(WWP1)
SEMA7A	semaphorin 7A (John Milton Hagen blood group)(SEMA7A)
GRID2	glutamate ionotropic receptor delta type subunit 2(GRID2)
ABCB10	ATP binding cassette subfamily B member 10(ABCB10)
PELI3	pellino E3 ubiquitin protein ligase family member 3(PELI3)
BSDC1	BSD domain containing 1(BSDC1)
SREK1IP1	SREK1 interacting protein 1(SREK1IP1)
EMX2	empty spiracles homeobox 2(EMX2)
TRABD2B	TraB domain containing 2B(TRABD2B)
TIMD4	T-cell immunoglobulin and mucin domain containing 4(TIMD4)
UBR3	ubiquitin protein ligase E3 component n-recognin 3 (putative)(UBR3)
DCTN5	dynactin subunit 5(DCTN5)
WNK3	WNK lysine deficient protein kinase 3(WNK3)
TXNDC9	thioredoxin domain containing 9(TXNDC9)
DCTN4	dynactin subunit 4(DCTN4)
FRY	FRY microtubule binding protein(FRY)
LHFPL2	lipoma HMGIC fusion partner-like 2(LHFPL2)
BAZ1A	bromodomain adjacent to zinc finger domain 1A(BAZ1A)
TXNDC5	thioredoxin domain containing 5(TXNDC5)
UBR5	ubiquitin protein ligase E3 component n-recognin 5(UBR5)
ACAP2	ArfGAP with coiled-coil, ankyrin repeat and PH domains 2(ACAP2)
TMEM170A	transmembrane protein 170A(TMEM170A)
FBXL5	F-box and leucine rich repeat protein 5(FBXL5)
NEK9	NIMA related kinase 9(NEK9)
HAS2	hyaluronan synthase 2(HAS2)
PIAS2	protein inhibitor of activated STAT 2(PIAS2)
TGFB1I1	transforming growth factor beta 1 induced transcript 1(TGFB1I1)
BIN2	bridging integrator 2(BIN2)
FBXL3	F-box and leucine rich repeat protein 3(FBXL3)
BLCAP	bladder cancer associated protein(BLCAP)
TPST1	tyrosylprotein sulfotransferase 1(TPST1)
TPST2	tyrosylprotein sulfotransferase 2(TPST2)
TMX3	thioredoxin related transmembrane protein 3(TMX3)
STK17B	serine/threonine kinase 17b(STK17B)
PRR14L	proline rich 14 like(PRR14L)
KRT20	keratin 20(KRT20)
SFXN2	sideroflexin 2(SFXN2)
PPAT	phosphoribosyl pyrophosphate amidotransferase(PPAT)
SEMA5A	semaphorin 5A(SEMA5A)
SEMA5B	semaphorin 5B(SEMA5B)
CD69	CD69 molecule(CD69)
IDH1	isocitrate dehydrogenase (NADP(+)) 1, cytosolic(IDH1)
AMD1	adenosylmethionine decarboxylase 1(AMD1)
CDC37L1	cell division cycle 37 like 1(CDC37L1)
FBXO9	F-box protein 9(FBXO9)
FBXO8	F-box protein 8(FBXO8)
CNKSR2	connector enhancer of kinase suppressor of Ras 2(CNKSR2)
IKZF5	IKAROS family zinc finger 5(IKZF5)
SBSPON	somatomedin B and thrombospondin type 1 domain containing(SBSPON)
SASH1	SAM and SH3 domain containing 1(SASH1)
IKZF4	IKAROS family zinc finger 4(IKZF4)
GPR155	G protein-coupled receptor 155(GPR155)
AEBP2	AE binding protein 2(AEBP2)
PELI1	pellino E3 ubiquitin protein ligase 1(PELI1)
GPR158	G protein-coupled receptor 158(GPR158)
ABR	active BCR-related(ABR)
GPR157	G protein-coupled receptor 157(GPR157)
IL1RL1	interleukin 1 receptor like 1(IL1RL1)
MAML1	mastermind like transcriptional coactivator 1(MAML1)
MAML2	mastermind like transcriptional coactivator 2(MAML2)
NDFIP1	Nedd4 family interacting protein 1(NDFIP1)
PPA2	pyrophosphatase (inorganic) 2(PPA2)
DDX6	DEAD-box helicase 6(DDX6)
CAPN15	calpain 15(CAPN15)
DLX3	distal-less homeobox 3(DLX3)
TNKS1BP1	tankyrase 1 binding protein 1(TNKS1BP1)
DMTF1	cyclin D binding myb like transcription factor 1(DMTF1)
CD59	CD59 molecule(CD59)
CHAF1A	chromatin assembly factor 1 subunit A(CHAF1A)
IDI1	isopentenyl-diphosphate delta isomerase 1(IDI1)
STEAP3	STEAP3 metalloreductase(STEAP3)
IER3IP1	immediate early response 3 interacting protein 1(IER3IP1)
PXDN	peroxidasin(PXDN)
CPEB3	cytoplasmic polyadenylation element binding protein 3(CPEB3)
PCDHA5	protocadherin alpha 5(PCDHA5)
TSNAX	translin associated factor X(TSNAX)
VPS37A	VPS37A, ESCRT-I subunit(VPS37A)
SENP5	SUMO1/sentrin specific peptidase 5(SENP5)
SENP7	SUMO1/sentrin specific peptidase 7(SENP7)
MCF2L	MCF.2 cell line derived transforming sequence like(MCF2L)
AP2B1	adaptor related protein complex 2 beta 1 subunit(AP2B1)
HIF1AN	hypoxia inducible factor 1 alpha subunit inhibitor(HIF1AN)
FAM228B	family with sequence similarity 228, member B(FAM228B)
AEN	apoptosis enhancing nuclease(AEN)
CHST11	carbohydrate sulfotransferase 11(CHST11)
SEMA3D	semaphorin 3D(SEMA3D)
JAKMIP2	janus kinase and microtubule interacting protein 2(JAKMIP2)
JPH1	junctophilin 1(JPH1)
VWA2	von Willebrand factor A domain containing 2(VWA2)
CCNK	cyclin K(CCNK)
STX1A	syntaxin 1A (brain)(STX1A)
LIN52	lin-52 DREAM MuvB core complex component(LIN52)
CCNC	cyclin C(CCNC)
LENG8	leukocyte receptor cluster member 8(LENG8)
NFAM1	NFAT activating protein with ITAM motif 1(NFAM1)
ARRDC3	arrestin domain containing 3(ARRDC3)
FAM196A	family with sequence similarity 196 member A(FAM196A)
FAM196B	family with sequence similarity 196 member B(FAM196B)
CD163	CD163 molecule(CD163)
SLC26A4	solute carrier family 26 member 4(SLC26A4)
ADO	2-aminoethanethiol dioxygenase(ADO)
SENP1	SUMO1/sentrin specific peptidase 1(SENP1)
SEMA4B	semaphorin 4B(SEMA4B)
LIN54	lin-54 DREAM MuvB core complex component(LIN54)
STEAP2	STEAP2 metalloreductase(STEAP2)
MAP3K14	mitogen-activated protein kinase kinase kinase 14(MAP3K14)
MAP3K12	mitogen-activated protein kinase kinase kinase 12(MAP3K12)
MAP3K11	mitogen-activated protein kinase kinase kinase 11(MAP3K11)
MYO5A	myosin VA(MYO5A)
PPP6C	protein phosphatase 6 catalytic subunit(PPP6C)
GPR180	G protein-coupled receptor 180(GPR180)
FAM193A	family with sequence similarity 193 member A(FAM193A)
FAM69C	family with sequence similarity 69 member C(FAM69C)
CYP4F22	cytochrome P450, family 4, subfamily F, polypeptide 22(CYP4F22)
KIT	KIT proto-oncogene receptor tyrosine kinase(KIT)
NETO1	neuropilin and tolloid like 1(NETO1)
FAM117B	family with sequence similarity 117 member B(FAM117B)
XBP1	X-box binding protein 1(XBP1)
MORC3	MORC family CW-type zinc finger 3(MORC3)
VWC2	von Willebrand factor C domain containing 2(VWC2)
BAZ2A	bromodomain adjacent to zinc finger domain 2A(BAZ2A)
CD28	CD28 molecule(CD28)
MYO5C	myosin VC(MYO5C)
CSNK1A1	casein kinase 1 alpha 1(CSNK1A1)
DLGAP2	DLG associated protein 2(DLGAP2)
JARID2	jumonji and AT-rich interaction domain containing 2(JARID2)
CTDNEP1	CTD nuclear envelope phosphatase 1(CTDNEP1)
MEOX2	mesenchyme homeobox 2(MEOX2)
FBLN2	fibulin 2(FBLN2)
AP2A1	adaptor related protein complex 2 alpha 1 subunit(AP2A1)
GOLPH3	golgi phosphoprotein 3(GOLPH3)
EEF1E1	eukaryotic translation elongation factor 1 epsilon 1(EEF1E1)
GFPT2	glutamine-fructose-6-phosphate transaminase 2(GFPT2)
NHLH2	nescient helix-loop-helix 2(NHLH2)
UBXN7	UBX domain protein 7(UBXN7)
UBXN4	UBX domain protein 4(UBXN4)
MKRN1	makorin ring finger protein 1(MKRN1)
GABRB2	gamma-aminobutyric acid type A receptor beta2 subunit(GABRB2)
F13A1	coagulation factor XIII A chain(F13A1)
RASGEF1B	RasGEF domain family member 1B(RASGEF1B)
FAM199X	family with sequence similarity 199, X-linked(FAM199X)
RASGEF1A	RasGEF domain family member 1A(RASGEF1A)
FOXO1	forkhead box O1(FOXO1)
RASGEF1C	RasGEF domain family member 1C(RASGEF1C)
TTL	tubulin tyrosine ligase(TTL)
WNT1	Wnt family member 1(WNT1)
TTR	transthyretin(TTR)
WNT4	Wnt family member 4(WNT4)
RAD21	RAD21 cohesin complex component(RAD21)
MYOCD	myocardin(MYOCD)
SLC25A23	solute carrier family 25 (mitochondrial carrier; phosphate carrier), member 23(SLC25A23)
RBMS2	RNA binding motif single stranded interacting protein 2(RBMS2)
RBMS3	RNA binding motif single stranded interacting protein 3(RBMS3)
PDGFC	platelet derived growth factor C(PDGFC)
ITCH	itchy E3 ubiquitin protein ligase(ITCH)
PPP4C	protein phosphatase 4 catalytic subunit(PPP4C)
LGI1	leucine rich glioma inactivated 1(LGI1)
RBMS1	RNA binding motif single stranded interacting protein 1(RBMS1)
SMIM19	small integral membrane protein 19(SMIM19)
TUB	tubby bipartite transcription factor(TUB)
CEP85	centrosomal protein 85(CEP85)
CSNK1G1	casein kinase 1 gamma 1(CSNK1G1)
CSNK1G2	casein kinase 1 gamma 2(CSNK1G2)
SMIM14	small integral membrane protein 14(SMIM14)
FOXN1	forkhead box N1(FOXN1)
RAI14	retinoic acid induced 14(RAI14)
NEBL	nebulette(NEBL)
SLTM	SAFB like transcription modulator(SLTM)
SLC25A32	solute carrier family 25 member 32(SLC25A32)
TRIM36	tripartite motif containing 36(TRIM36)
SLC25A34	solute carrier family 25 member 34(SLC25A34)
SLC25A36	solute carrier family 25 member 36(SLC25A36)
IGSF3	immunoglobulin superfamily member 3(IGSF3)
TRIM32	tripartite motif containing 32(TRIM32)
PYGO1	pygopus homolog 1 (Drosophila)(PYGO1)
PYGO2	pygopus family PHD finger 2(PYGO2)
MAP7D1	MAP7 domain containing 1(MAP7D1)
FGFR1	fibroblast growth factor receptor 1(FGFR1)
ARFRP1	ADP ribosylation factor related protein 1(ARFRP1)
NEDD9	neural precursor cell expressed, developmentally down-regulated 9(NEDD9)
DAZAP2	DAZ associated protein 2(DAZAP2)
KLHDC10	kelch domain containing 10(KLHDC10)
SLX4	SLX4 structure-specific endonuclease subunit(SLX4)
TAGAP	T-cell activation RhoGTPase activating protein(TAGAP)
TRIM66	tripartite motif containing 66(TRIM66)
UBE2D3	ubiquitin conjugating enzyme E2 D3(UBE2D3)
UBE2D2	ubiquitin conjugating enzyme E2 D2(UBE2D2)
ANKIB1	ankyrin repeat and IBR domain containing 1(ANKIB1)
ARL6IP6	ADP ribosylation factor like GTPase 6 interacting protein 6(ARL6IP6)
SSX2IP	SSX family member 2 interacting protein(SSX2IP)
UBE2D1	ubiquitin conjugating enzyme E2 D1(UBE2D1)
PPTC7	PTC7 protein phosphatase homolog(PPTC7)
SREBF1	sterol regulatory element binding transcription factor 1(SREBF1)
EEF1A1	eukaryotic translation elongation factor 1 alpha 1(EEF1A1)
KAT7	lysine acetyltransferase 7(KAT7)
TTC21B	tetratricopeptide repeat domain 21B(TTC21B)
ZNF830	zinc finger protein 830(ZNF830)
SPTBN4	spectrin beta, non-erythrocytic 4(SPTBN4)
RFX7	regulatory factor X, 7(RFX7)
SACS	sacsin molecular chaperone(SACS)
AK2	adenylate kinase 2(AK2)
AK4	adenylate kinase 4(AK4)
AK7	adenylate kinase 7(AK7)
FOXP4	forkhead box P4(FOXP4)
BRCA1	BRCA1, DNA repair associated(BRCA1)
KCTD6	potassium channel tetramerisation domain containing 6(KCTD6)
KCTD8	potassium channel tetramerization domain containing 8(KCTD8)
URM1	ubiquitin related modifier 1(URM1)
PLEKHA3	pleckstrin homology domain containing A3(PLEKHA3)
PLEKHA6	pleckstrin homology domain containing A6(PLEKHA6)
PLEKHA5	pleckstrin homology domain containing A5(PLEKHA5)
NEDD4	neural precursor cell expressed, developmentally down-regulated 4, E3 ubiquitin protein ligase(NEDD4)
PLEKHA7	pleckstrin homology domain containing A7(PLEKHA7)
SPTBN2	spectrin beta, non-erythrocytic 2(SPTBN2)
YIPF5	Yip1 domain family member 5(YIPF5)
YIPF4	Yip1 domain family member 4(YIPF4)
SLC25A16	solute carrier family 25 member 16(SLC25A16)
PIP4K2A	phosphatidylinositol-5-phosphate 4-kinase type 2 alpha(PIP4K2A)
CCNDBP1	cyclin D1 binding protein 1(CCNDBP1)
GLYR1	glyoxylate reductase 1 homolog(GLYR1)
PIP4K2C	phosphatidylinositol-5-phosphate 4-kinase type 2 gamma(PIP4K2C)
YIPF1	Yip1 domain family member 1(YIPF1)
UBE2E1	ubiquitin conjugating enzyme E2 E1(UBE2E1)
PLEKHA1	pleckstrin homology domain containing A1(PLEKHA1)
DNAL4	dynein axonemal light chain 4(DNAL4)
CRYZL1	crystallin zeta like 1(CRYZL1)
PIP4K2B	phosphatidylinositol-5-phosphate 4-kinase type 2 beta(PIP4K2B)
CDK19	cyclin dependent kinase 19(CDK19)
POU6F1	POU class 6 homeobox 1(POU6F1)
CYTIP	cytohesin 1 interacting protein(CYTIP)
KIAA0226	KIAA0226 ortholog(KIAA0226)
SGPP1	sphingosine-1-phosphate phosphatase 1(SGPP1)
ARHGAP18	Rho GTPase activating protein 18(ARHGAP18)
NUP188	nucleoporin 188(NUP188)
CBFA2T2	CBFA2/RUNX1 translocation partner 2(CBFA2T2)
LARP1	La ribonucleoprotein domain family member 1(LARP1)
ARHGAP12	Rho GTPase activating protein 12(ARHGAP12)
PLEKHB2	pleckstrin homology domain containing B2(PLEKHB2)
RMND5A	required for meiotic nuclear division 5 homolog A(RMND5A)
PCBP4	poly(rC) binding protein 4(PCBP4)
EXOC3L2	exocyst complex component 3 like 2(EXOC3L2)
PCBP1	poly(rC) binding protein 1(PCBP1)
PCBP2	poly(rC) binding protein 2(PCBP2)
CDK12	cyclin dependent kinase 12(CDK12)
NIPAL1	NIPA like domain containing 1(NIPAL1)
CDK16	cyclin dependent kinase 16(CDK16)
MAPKBP1	mitogen-activated protein kinase binding protein 1(MAPKBP1)
CDK14	cyclin dependent kinase 14(CDK14)
KIAA0232	KIAA0232 ortholog(KIAA0232)
ALX1	ALX homeobox 1(ALX1)
GABRG1	gamma-aminobutyric acid (GABA) A receptor, gamma 1(GABRG1)
GABRG2	gamma-aminobutyric acid type A receptor gamma2 subunit(GABRG2)
NRIP3	nuclear receptor interacting protein 3(NRIP3)
FOXJ2	forkhead box J2(FOXJ2)
RALBP1	ralA binding protein 1(RALBP1)
PFKP	phosphofructokinase, platelet(PFKP)
SEL1L3	SEL1L family member 3(SEL1L3)
TBCEL	tubulin folding cofactor E like(TBCEL)
FOXJ3	forkhead box J3(FOXJ3)
PFKM	phosphofructokinase, muscle(PFKM)
ARHGAP29	Rho GTPase activating protein 29(ARHGAP29)
NLRP3	NLR family pyrin domain containing 3(NLRP3)
EML2	echinoderm microtubule associated protein like 2(EML2)
JOSD1	Josephin domain containing 1(JOSD1)
COQ2	coenzyme Q2, polyprenyltransferase(COQ2)
LARP4	La ribonucleoprotein domain family member 4(LARP4)
CFL2	cofilin 2(CFL2)
MDM4	MDM4, p53 regulator(MDM4)
PPP4R4	protein phosphatase 4 regulatory subunit 4(PPP4R4)
NUP160	nucleoporin 160(NUP160)
TNC	tenascin C(TNC)
MUM1L1	MUM1 like 1(MUM1L1)
ZNF800	zinc finger protein 800(ZNF800)
HAT1	histone acetyltransferase 1(HAT1)
ARHGAP36	Rho GTPase activating protein 36(ARHGAP36)
CEP55	centrosomal protein 55kDa(CEP55)
PLBD2	phospholipase B domain containing 2(PLBD2)
RPA2	replication protein A2(RPA2)
MAP3K3	mitogen-activated protein kinase kinase kinase 3(MAP3K3)
CEP57	centrosomal protein 57(CEP57)
MAP3K2	mitogen-activated protein kinase kinase kinase 2(MAP3K2)
NFAT5	nuclear factor of activated T-cells 5(NFAT5)
NEFH	neurofilament heavy polypeptide(NEFH)
ZC3H12A	zinc finger CCCH-type containing 12A(ZC3H12A)
HS6ST2	heparan sulfate 6-O-sulfotransferase 2(HS6ST2)
CAMK2A	calcium/calmodulin dependent protein kinase II alpha(CAMK2A)
NEFM	neurofilament, medium polypeptide(NEFM)
CRIM1	cysteine rich transmembrane BMP regulator 1(CRIM1)
ZC3H12C	zinc finger CCCH-type containing 12C(ZC3H12C)
TXNIP	thioredoxin interacting protein(TXNIP)
NACC1	nucleus accumbens associated 1(NACC1)
KAT2B	lysine acetyltransferase 2B(KAT2B)
SVEP1	sushi, von Willebrand factor type A, EGF and pentraxin domain containing 1(SVEP1)
NACC2	NACC family member 2(NACC2)
UBL3	ubiquitin like 3(UBL3)
WSB1	WD repeat and SOCS box containing 1(WSB1)
CSGALNACT1	chondroitin sulfate N-acetylgalactosaminyltransferase 1(CSGALNACT1)
ATXN2	ataxin 2(ATXN2)
ATXN3	ataxin 3(ATXN3)
SYDE2	synapse defective Rho GTPase homolog 2(SYDE2)
CDAN1	codanin 1(CDAN1)
KAZALD1	Kazal type serine peptidase inhibitor domain 1(KAZALD1)
ITPRIPL2	inositol 1,4,5-trisphosphate receptor interacting protein like 2(ITPRIPL2)
CSGALNACT2	chondroitin sulfate N-acetylgalactosaminyltransferase 2(CSGALNACT2)
PSPC1	paraspeckle component 1(PSPC1)
DUS2	dihydrouridine synthase 2(DUS2)
URI1	URI1, prefoldin like chaperone(URI1)
SLC25A51	solute carrier family 25 member 51(SLC25A51)
GGNBP2	gametogenetin binding protein 2(GGNBP2)
ARAP2	ArfGAP with RhoGAP domain, ankyrin repeat and PH domain 2(ARAP2)
SLC9A6	solute carrier family 9 member A6(SLC9A6)
SLC9A2	solute carrier family 9 member A2(SLC9A2)
ACBD5	acyl-CoA binding domain containing 5(ACBD5)
PGR	progesterone receptor(PGR)
ACBD3	acyl-CoA binding domain containing 3(ACBD3)
ADTRP	androgen dependent TFPI regulating protein(ADTRP)
PGP	phosphoglycolate phosphatase(PGP)
BHLHB9	basic helix-loop-helix domain containing, class B, 9(BHLHB9)
PLS1	plastin 1(PLS1)
GNG2	G protein subunit gamma 2(GNG2)
MAP2K7	mitogen-activated protein kinase kinase 7(MAP2K7)
IBTK	inhibitor of Bruton tyrosine kinase(IBTK)
PTPRK	protein tyrosine phosphatase, receptor type K(PTPRK)
TYRO3	TYRO3 protein tyrosine kinase(TYRO3)
MDH1B	malate dehydrogenase 1B(MDH1B)
TNIK	TRAF2 and NCK interacting kinase(TNIK)
PTPRM	protein tyrosine phosphatase, receptor type M(PTPRM)
PTPRF	protein tyrosine phosphatase, receptor type F(PTPRF)
RCOR3	REST corepressor 3(RCOR3)
PTPRG	protein tyrosine phosphatase, receptor type G(PTPRG)
ADAMTS20	ADAM metallopeptidase with thrombospondin type 1 motif 20(ADAMTS20)
PTPRR	protein tyrosine phosphatase, receptor type R(PTPRR)
NAA25	N(alpha)-acetyltransferase 25, NatB auxiliary subunit(NAA25)
ZHX3	zinc fingers and homeoboxes 3(ZHX3)
SPAG7	sperm associated antigen 7(SPAG7)
TRAPPC8	trafficking protein particle complex 8(TRAPPC8)
FCHSD2	FCH and double SH3 domains 2(FCHSD2)
SURF4	surfeit 4(SURF4)
FDX1L	ferredoxin 1 like(FDX1L)
VGLL4	vestigial like family member 4(VGLL4)
ADAMTS2	ADAM metallopeptidase with thrombospondin type 1 motif 2(ADAMTS2)
ADAMTS5	ADAM metallopeptidase with thrombospondin type 1 motif 5(ADAMTS5)
GNAI3	G protein subunit alpha i3(GNAI3)
MIPOL1	mirror-image polydactyly 1(MIPOL1)
CYP2B6	cytochrome P450 2B11(CYP2B6)
GNAI1	G protein subunit alpha i1(GNAI1)
RHPN2	rhophilin Rho GTPase binding protein 2(RHPN2)
CDC42EP2	CDC42 effector protein 2(CDC42EP2)
SYPL1	synaptophysin like 1(SYPL1)
NAA30	N(alpha)-acetyltransferase 30, NatC catalytic subunit(NAA30)
GORASP2	golgi reassembly stacking protein 2(GORASP2)
CDADC1	cytidine and dCMP deaminase domain containing 1(CDADC1)
TNKS	tankyrase(TNKS)
FAM162A	family with sequence similarity 162 member A(FAM162A)
VEZF1	vascular endothelial zinc finger 1(VEZF1)
IQSEC3	IQ motif and Sec7 domain 3(IQSEC3)
CDC42EP3	CDC42 effector protein 3(CDC42EP3)
MEPCE	methylphosphate capping enzyme(MEPCE)
PRPF40A	pre-mRNA processing factor 40 homolog A(PRPF40A)
GIT1	GIT ArfGAP 1(GIT1)
RANBP17	RAN binding protein 17(RANBP17)
ODC1	ornithine decarboxylase 1(ODC1)
SPHK2	sphingosine kinase 2(SPHK2)
KLF10	Kruppel like factor 10(KLF10)
TGFBR2	transforming growth factor beta receptor 2(TGFBR2)
MAP2K4	mitogen-activated protein kinase kinase 4(MAP2K4)
KLF11	Kruppel like factor 11(KLF11)
FXR1	fragile X mental retardation, autosomal homolog 1(FXR1)
UBA2	ubiquitin like modifier activating enzyme 2(UBA2)
TRPS1	transcriptional repressor GATA binding 1(TRPS1)
TGFBR3	transforming growth factor beta receptor 3(TGFBR3)
MAP7	microtubule associated protein 7(MAP7)
SLC9A1	solute carrier family 9 member A1(SLC9A1)
LIMA1	LIM domain and actin binding 1(LIMA1)
CRNKL1	crooked neck pre-mRNA splicing factor 1(CRNKL1)
CRCP	CGRP receptor component(CRCP)
RLIM	ring finger protein, LIM domain interacting(RLIM)
KCNK10	potassium two pore domain channel subfamily K member 10(KCNK10)
LSM14A	LSM14A, mRNA processing body assembly factor(LSM14A)
CCNE2	cyclin E2(CCNE2)
CCNE1	cyclin E1(CCNE1)
LSM14B	LSM family member 14B(LSM14B)
RRN3	RRN3 homolog, RNA polymerase I transcription factor(RRN3)
HSF2	heat shock transcription factor 2(HSF2)
SLMAP	sarcolemma associated protein(SLMAP)
GUCY1A2	guanylate cyclase 1 soluble subunit alpha 2(GUCY1A2)
HSF5	heat shock transcription factor 5(HSF5)
GUCY1A3	guanylate cyclase 1 soluble subunit alpha(GUCY1A3)
MASTL	microtubule associated serine/threonine kinase like(MASTL)
TRPV6	transient receptor potential cation channel subfamily V member 6(TRPV6)
SIK1	salt inducible kinase 1(SIK1)
FBXL16	F-box and leucine rich repeat protein 16(FBXL16)
FBXL17	F-box and leucine rich repeat protein 17(FBXL17)
SRPK2	SRSF protein kinase 2(SRPK2)
ARHGEF7	Rho guanine nucleotide exchange factor 7(ARHGEF7)
GMEB2	glucocorticoid modulatory element binding protein 2(GMEB2)
ERLIN2	ER lipid raft associated 2(ERLIN2)
ARHGEF9	Cdc42 guanine nucleotide exchange factor 9(ARHGEF9)
ZSWIM3	zinc finger SWIM-type containing 3(ZSWIM3)
MAST3	microtubule associated serine/threonine kinase 3(MAST3)
SQLE	squalene epoxidase(SQLE)
XPR1	xenotropic and polytropic retrovirus receptor 1(XPR1)
RRM2	ribonucleotide reductase regulatory subunit M2(RRM2)
CYBRD1	cytochrome b reductase 1(CYBRD1)
SRGAP3	SLIT-ROBO Rho GTPase activating protein 3(SRGAP3)
GNB5	G protein subunit beta 5(GNB5)
G0S2	G0/G1 switch 2(G0S2)
EIF5A2	eukaryotic translation initiation factor 5A2(EIF5A2)
RAPGEFL1	Rap guanine nucleotide exchange factor like 1(RAPGEFL1)
SRGAP1	SLIT-ROBO Rho GTPase activating protein 1(SRGAP1)
CLOCK	clock circadian regulator(CLOCK)
TBC1D8	TBC1 domain family member 8(TBC1D8)
GPR63	G protein-coupled receptor 63(GPR63)
WRNIP1	Werner helicase interacting protein 1(WRNIP1)
HK2	hexokinase 2(HK2)
FHL2	four and a half LIM domains 2(FHL2)
ITM2B	integral membrane protein 2B(ITM2B)
MYCBP2	MYC binding protein 2, E3 ubiquitin protein ligase(MYCBP2)
UEVLD	UEV and lactate/malate dehyrogenase domains(UEVLD)
CRISPLD1	cysteine rich secretory protein LCCL domain containing 1(CRISPLD1)
KIRREL	kin of IRRE like (Drosophila)(KIRREL)
NUP210	nucleoporin 210(NUP210)
PER2	period circadian clock 2(PER2)
RAB11B	RAB11B, member RAS oncogene family(RAB11B)
WIPF2	WAS/WASL interacting protein family member 2(WIPF2)
CSDE1	cold shock domain containing E1(CSDE1)
LIMD1	LIM domains containing 1(LIMD1)
TCEA1	transcription elongation factor A1(TCEA1)
SLC4A9	solute carrier family 4 member 9(SLC4A9)
MYSM1	Myb like, SWIRM and MPN domains 1(MYSM1)
TBC1D2	TBC1 domain family member 2(TBC1D2)
FLRT3	fibronectin leucine rich transmembrane protein 3(FLRT3)
CAPN6	calpain 6(CAPN6)
DNM3	dynamin 3(DNM3)
ACTC1	actin, alpha, cardiac muscle 1(ACTC1)
EXPH5	exophilin 5(EXPH5)
RPS6KA5	ribosomal protein S6 kinase A5(RPS6KA5)
FEM1C	fem-1 homolog C(FEM1C)
RPS6KA4	ribosomal protein S6 kinase A4(RPS6KA4)
PKNOX1	PBX/knotted 1 homeobox 1(PKNOX1)
RPS6KA2	ribosomal protein S6 kinase A2(RPS6KA2)
BCORL1	BCL6 corepressor-like 1(BCORL1)
NPHS1	NPHS1, nephrin(NPHS1)
HSPA4L	heat shock protein family A (Hsp70) member 4 like(HSPA4L)
MAT2B	methionine adenosyltransferase 2B(MAT2B)
XPO1	exportin 1(XPO1)
CAPZA2	capping actin protein of muscle Z-line alpha subunit 2(CAPZA2)
SLC44A5	solute carrier family 44 member 5(SLC44A5)
ZNF451	zinc finger protein 451(ZNF451)
CAPZA1	capping actin protein of muscle Z-line alpha subunit 1(CAPZA1)
CNOT2	CCR4-NOT transcription complex subunit 2(CNOT2)
IQGAP2	IQ motif containing GTPase activating protein 2(IQGAP2)
CNOT7	CCR4-NOT transcription complex subunit 7(CNOT7)
CNOT6	CCR4-NOT transcription complex subunit 6(CNOT6)
MIER1	MIER1 transcriptional regulator(MIER1)
B3GALNT2	beta-1,3-N-acetylgalactosaminyltransferase 2(B3GALNT2)
MIER3	MIER family member 3(MIER3)
LONRF3	LON peptidase N-terminal domain and ring finger 3(LONRF3)
PUM2	pumilio RNA binding family member 2(PUM2)
LONRF1	LON peptidase N-terminal domain and ring finger 1(LONRF1)
LONRF2	LON peptidase N-terminal domain and ring finger 2(LONRF2)
TWF1	twinfilin actin binding protein 1(TWF1)
ACTN4	actinin alpha 4(ACTN4)
GOLT1B	golgi transport 1B(GOLT1B)
NCALD	neurocalcin delta(NCALD)
TAZ	tafazzin(TAZ)
PISD	phosphatidylserine decarboxylase(PISD)
ARID1B	AT-rich interaction domain 1B(ARID1B)
SIX4	SIX homeobox 4(SIX4)
GRHL1	grainyhead like transcription factor 1(GRHL1)
SLC34A3	solute carrier family 34 member 3(SLC34A3)
DDIT4	DNA damage inducible transcript 4(DDIT4)
PA2G4	proliferation-associated 2G4(PA2G4)
MFAP2	microfibrillar associated protein 2(MFAP2)
SLC40A1	solute carrier family 40 member 1(SLC40A1)
ZNF436	zinc finger protein 436(ZNF436)
NETO2	neuropilin and tolloid like 2(NETO2)
CAMTA1	calmodulin binding transcription activator 1(CAMTA1)
FAM160B1	family with sequence similarity 160 member B1(FAM160B1)
HMGB1	high mobility group box 1(HMGB1)
CNBP	CCHC-type zinc finger nucleic acid binding protein(CNBP)
CAMTA2	calmodulin binding transcription activator 2(CAMTA2)
PANX2	pannexin 2(PANX2)
NKAIN2	Na+/K+ transporting ATPase interacting 2(NKAIN2)
LRIG1	leucine rich repeats and immunoglobulin like domains 1(LRIG1)
PAH	phenylalanine hydroxylase(PAH)
CCNG1	cyclin G1(CCNG1)
CCNG2	cyclin G2(CCNG2)
EXTL2	exostosin like glycosyltransferase 2(EXTL2)
TMEM178A	transmembrane protein 178A(TMEM178A)
GPR22	G protein-coupled receptor 22(GPR22)
SLC48A1	solute carrier family 48 (heme transporter), member 1(SLC48A1)
TEF	TEF, PAR bZIP transcription factor(TEF)
KIAA1211	KIAA1211 ortholog(KIAA1211)
B4GALT6	beta-1,4-galactosyltransferase 6(B4GALT6)
LYSMD2	LysM domain containing 2(LYSMD2)
TRAF3	TNF receptor associated factor 3(TRAF3)
TAF4	TATA-box binding protein associated factor 4(TAF4)
OVGP1	oviductal glycoprotein 1(OVGP1)
VAV3	vav guanine nucleotide exchange factor 3(VAV3)
DOCK9	dedicator of cytokinesis 9(DOCK9)
SMG1	SMG1, nonsense mediated mRNA decay associated PI3K related kinase(SMG1)
WIPI2	WD repeat domain, phosphoinositide interacting 2(WIPI2)
SHANK2	SH3 and multiple ankyrin repeat domains 2(SHANK2)
SUV39H2	suppressor of variegation 3-9 homolog 2(SUV39H2)
GPR37	G protein-coupled receptor 37(GPR37)
CDKN2AIP	CDKN2A interacting protein(CDKN2AIP)
TDG	thymine DNA glycosylase(TDG)
XPO7	exportin 7(XPO7)
ACOX1	acyl-CoA oxidase 1(ACOX1)
ARID4A	AT-rich interaction domain 4A(ARID4A)
DICER1	dicer 1, ribonuclease III(DICER1)
ARID4B	AT-rich interaction domain 4B(ARID4B)
PIP5K1B	phosphatidylinositol-4-phosphate 5-kinase type 1 beta(PIP5K1B)
WWC1	WW and C2 domain containing 1(WWC1)
PIP5K1C	phosphatidylinositol-4-phosphate 5-kinase type 1 gamma(PIP5K1C)
ALG6	ALG6, alpha-1,3-glucosyltransferase(ALG6)
PEX3	peroxisomal biogenesis factor 3(PEX3)
ALG9	ALG9, alpha-1,2-mannosyltransferase(ALG9)
ZKSCAN2	zinc finger with KRAB and SCAN domains 2(ZKSCAN2)
RHOU	ras homolog family member U(RHOU)
TSPAN12	tetraspanin 12(TSPAN12)
PEX2	peroxisomal biogenesis factor 2(PEX2)
RSPO2	R-spondin 2(RSPO2)
CABLES2	Cdk5 and Abl enzyme substrate 2(CABLES2)
RHOC	ras homolog family member C(RHOC)
YAP1	Yes associated protein 1(YAP1)
TRPM3	transient receptor potential cation channel subfamily M member 3(TRPM3)
LIMK1	LIM domain kinase 1(LIMK1)
METTL4	methyltransferase like 4(METTL4)
TRPM7	transient receptor potential cation channel subfamily M member 7(TRPM7)
OTX2	orthodenticle homeobox 2(OTX2)
PADI2	peptidyl arginine deiminase 2(PADI2)
TMEM248	transmembrane protein 248(TMEM248)
CDK6	cyclin dependent kinase 6(CDK6)
MAN1A1	mannosidase alpha class 1A member 1(MAN1A1)
PBK	PDZ binding kinase(PBK)
TOPORS	TOP1 binding arginine/serine rich protein(TOPORS)
KIDINS220	kinase D-interacting substrate 220kDa(KIDINS220)
ATP6V1D	ATPase H+ transporting V1 subunit D(ATP6V1D)
VAT1	vesicle amine transport 1(VAT1)
PURA	purine rich element binding protein A(PURA)
ISCA1	iron-sulfur cluster assembly 1(ISCA1)
RFWD2	ring finger and WD repeat domain 2(RFWD2)
PPM1D	protein phosphatase, Mg2+/Mn2+ dependent 1D(PPM1D)
NCOA1	nuclear receptor coactivator 1(NCOA1)
RFWD3	ring finger and WD repeat domain 3(RFWD3)
IPO7	importin 7(IPO7)
CHRM2	cholinergic receptor muscarinic 2(CHRM2)
IPO4	importin 4(IPO4)
IPO5	importin 5(IPO5)
DEF8	differentially expressed in FDCP 8 homolog(DEF8)
NCAN	neurocan(NCAN)
ADAMTS18	ADAM metallopeptidase with thrombospondin type 1 motif 18(ADAMTS18)
BTAF1	BTAF1 RNA polymerase II, B-TFIID transcription factor-associated, 170kDa (Mot1 homolog, S. cerevisiae)(BTAF1)
MMGT1	membrane magnesium transporter 1(MMGT1)
NFYB	nuclear transcription factor Y subunit beta(NFYB)
CDH1	cadherin 1(CDH1)
WBP11	WW domain binding protein 11(WBP11)
NR3C1	nuclear receptor subfamily 3 group C member 1(NR3C1)
ESYT2	extended synaptotagmin 2(ESYT2)
CCNJL	cyclin J like(CCNJL)
ESYT1	extended synaptotagmin 1(ESYT1)
ESPN	espin(ESPN)
PRDM15	PR/SET domain 15(PRDM15)
COL17A1	collagen type XVII alpha 1 chain(COL17A1)
SLCO1A2	solute carrier organic anion transporter family member 1A2(SLCO1A2)
PRDM10	PR/SET domain 10(PRDM10)
INPP5B	inositol polyphosphate-5-phosphatase B(INPP5B)
RNF144A	ring finger protein 144A(RNF144A)
RNF144B	ring finger protein 144B(RNF144B)
WDTC1	WD and tetratricopeptide repeats 1(WDTC1)
FLT1	fms related tyrosine kinase 1(FLT1)
IGLON5	IgLON family member 5(IGLON5)
FLT3	fms related tyrosine kinase 3(FLT3)
TSPAN14	tetraspanin 14(TSPAN14)
SMC6	structural maintenance of chromosomes 6(SMC6)
SMC2	structural maintenance of chromosomes 2(SMC2)
TAB3	TGF-beta activated kinase 1/MAP3K7 binding protein 3(TAB3)
TMEM260	transmembrane protein 260(TMEM260)
DBT	dihydrolipoamide branched chain transacylase E2(DBT)
TBL1X	transducin beta like 1X-linked(TBL1X)
ADCY3	adenylate cyclase 3(ADCY3)
SNCG	synuclein gamma(SNCG)
DYNC1LI2	dynein cytoplasmic 1 light intermediate chain 2(DYNC1LI2)
ALAD	aminolevulinate dehydratase(ALAD)
ADCY1	adenylate cyclase 1(ADCY1)
STARD3NL	STARD3 N-terminal like(STARD3NL)
ADCY2	adenylate cyclase 2(ADCY2)
CHMP3	charged multivesicular body protein 3(CHMP3)
SNCB	synuclein beta(SNCB)
VAPB	VAMP associated protein B and C(VAPB)
PITPNA	phosphatidylinositol transfer protein alpha(PITPNA)
PDLIM5	PDZ and LIM domain 5(PDLIM5)
ADCY5	adenylate cyclase 5(ADCY5)
EFNA3	ephrin A3(EFNA3)
AQP4	aquaporin 4(AQP4)
GPCPD1	glycerophosphocholine phosphodiesterase 1(GPCPD1)
TAF7L	TATA-box binding protein associated factor 7 like(TAF7L)
SHB	SH2 domain containing adaptor protein B(SHB)
BDNF	brain derived neurotrophic factor(BDNF)
S1PR1	sphingosine-1-phosphate receptor 1(S1PR1)
CRY2	cryptochrome circadian clock 2(CRY2)
PRRT2	proline rich transmembrane protein 2(PRRT2)
COL4A3BP	collagen type IV alpha 3 binding protein(COL4A3BP)
CCSAP	centriole, cilia and spindle associated protein(CCSAP)
INSIG1	insulin induced gene 1(INSIG1)
FAM53C	family with sequence similarity 53 member C(FAM53C)
RAPGEF4	Rap guanine nucleotide exchange factor 4(RAPGEF4)
NUP35	nucleoporin 35(NUP35)
CRY1	cryptochrome circadian clock 1(CRY1)
PAN3	PAN3 poly(A) specific ribonuclease subunit(PAN3)
STRN3	striatin 3(STRN3)
MDGA1	MAM domain containing glycosylphosphatidylinositol anchor 1(MDGA1)
MDGA2	MAM domain containing glycosylphosphatidylinositol anchor 2(MDGA2)
PIM1	Pim-1 proto-oncogene, serine/threonine kinase(PIM1)
VASH2	vasohibin 2(VASH2)
GID4	GID complex subunit 4 homolog(GID4)
PCF11	PCF11 cleavage and polyadenylation factor subunit(PCF11)
GAPVD1	GTPase activating protein and VPS9 domains 1(GAPVD1)
CC2D2B	coiled-coil and C2 domain containing 2B(CC2D2B)
PDGFRA	platelet derived growth factor receptor alpha(PDGFRA)
TMEM184B	transmembrane protein 184B(TMEM184B)
RFESD	Rieske Fe-S domain containing(RFESD)
NUP43	nucleoporin 43(NUP43)
TBC1D8B	TBC1 domain family member 8B(TBC1D8B)
PALM	paralemmin(PALM)
NOC3L	nucleolar complex associated 3 homolog (S. cerevisiae)(NOC3L)
FAM122B	family with sequence similarity 122B(FAM122B)
ASAP2	ArfGAP with SH3 domain, ankyrin repeat and PH domain 2(ASAP2)
FAM122A	family with sequence similarity 122A(FAM122A)
AKAP10	A-kinase anchoring protein 10(AKAP10)
ASB14	ankyrin repeat and SOCS box containing 14(ASB14)
IGF2BP2	insulin like growth factor 2 mRNA binding protein 2(IGF2BP2)
PXK	PX domain containing serine/threonine kinase like(PXK)
AKAP11	A-kinase anchoring protein 11(AKAP11)
MYT1	myelin transcription factor 1(MYT1)
PXN	paxillin(PXN)
TIPRL	TOR signaling pathway regulator(TIPRL)
SERINC3	serine incorporator 3(SERINC3)
CEP170	centrosomal protein 170(CEP170)
NUP50	nucleoporin 50(NUP50)
IL1RAPL1	interleukin 1 receptor accessory protein like 1(IL1RAPL1)
TRAM1	translocation associated membrane protein 1(TRAM1)
SRP54	signal recognition particle 54(SRP54)
NRBF2	nuclear receptor binding factor 2(NRBF2)
SMAD7	SMAD family member 7(SMAD7)
SMAD5	SMAD family member 5(SMAD5)
YTHDC1	YTH domain containing 1(YTHDC1)
SMAD3	SMAD family member 3(SMAD3)
TRIO	trio Rho guanine nucleotide exchange factor(TRIO)
SKI	SKI proto-oncogene(SKI)
TAX1BP1	Tax1 binding protein 1(TAX1BP1)
HYOU1	hypoxia up-regulated 1(HYOU1)
SOWAHC	sosondowah ankyrin repeat domain family member C(SOWAHC)
CHCHD10	coiled-coil-helix-coiled-coil-helix domain containing 10(CHCHD10)
KIAA0922	KIAA0922 ortholog(KIAA0922)
TMOD3	tropomodulin 3(TMOD3)
NSMF	NMDA receptor synaptonuclear signaling and neuronal migration factor(NSMF)
LGALSL	galectin like(LGALSL)
FAM91A1	family with sequence similarity 91 member A1(FAM91A1)
COPS2	COP9 signalosome subunit 2(COPS2)
FASTK	Fas activated serine/threonine kinase(FASTK)
TBX21	T-box 21(TBX21)
SLC16A12	solute carrier family 16 member 12(SLC16A12)
NFKB1	nuclear factor kappa B subunit 1(NFKB1)
FAM57A	family with sequence similarity 57 member A(FAM57A)
APCDD1	APC down-regulated 1(APCDD1)
WBP2	WW domain binding protein 2(WBP2)
ACTR2	ARP2 actin related protein 2 homolog(ACTR2)
PARG	poly(ADP-ribose) glycohydrolase(PARG)
PACRGL	PARK2 coregulated like(PACRGL)
NR2F2	nuclear receptor subfamily 2 group F member 2(NR2F2)
NT5E	5'-nucleotidase ecto(NT5E)
AP3B1	adaptor related protein complex 3 beta 1 subunit(AP3B1)
ADAM10	ADAM metallopeptidase domain 10(ADAM10)
MESDC1	mesoderm development candidate 1(MESDC1)
SNAPC1	small nuclear RNA activating complex polypeptide 1(SNAPC1)
FAM45A	family with sequence similarity 45 member A(FAM45A)
CDS1	CDP-diacylglycerol synthase 1(CDS1)
LDLRAP1	low density lipoprotein receptor adaptor protein 1(LDLRAP1)
MED6	mediator complex subunit 6(MED6)
PDIK1L	PDLIM1 interacting kinase 1 like(PDIK1L)
MED9	mediator complex subunit 9(MED9)
ADAM17	ADAM metallopeptidase domain 17(ADAM17)
ADAM19	ADAM metallopeptidase domain 19(ADAM19)
GADD45B	growth arrest and DNA damage inducible beta(GADD45B)
ADAM12	ADAM metallopeptidase domain 12(ADAM12)
GADD45A	growth arrest and DNA damage inducible alpha(GADD45A)
SLC27A4	solute carrier family 27 member 4(SLC27A4)
USP7	ubiquitin specific peptidase 7(USP7)
SHROOM2	shroom family member 2(SHROOM2)
BCAT2	branched chain amino acid transaminase 2(BCAT2)
CEP120	centrosomal protein 120(CEP120)
SHROOM4	shroom family member 4(SHROOM4)
USP3	ubiquitin specific peptidase 3(USP3)
ABTB2	ankyrin repeat and BTB domain containing 2(ABTB2)
LANCL1	LanC like 1(LANCL1)
LIX1	limb and CNS expressed 1(LIX1)
COX7A2L	cytochrome c oxidase subunit VIIa polypeptide 2 like(COX7A2L)
CIC	capicua transcriptional repressor(CIC)
FAM46A	family with sequence similarity 46 member A(FAM46A)
SLC19A2	solute carrier family 19 member 2(SLC19A2)
FAM46C	family with sequence similarity 46 member C(FAM46C)
STARD13	StAR related lipid transfer domain containing 13(STARD13)
FAM46B	family with sequence similarity 46 member B(FAM46B)
SUMO3	small ubiquitin-like modifier 3(SUMO3)
FAM46D	family with sequence similarity 46 member D(FAM46D)
RB1CC1	RB1 inducible coiled-coil 1(RB1CC1)
LANCL3	LanC like 3(LANCL3)
CHM	CHM, Rab escort protein 1(CHM)
AP3D1	adaptor related protein complex 3 delta 1 subunit(AP3D1)
AGO2	argonaute 2, RISC catalytic component(AGO2)
PCMT1	protein-L-isoaspartate (D-aspartate) O-methyltransferase(PCMT1)
CC2D1B	coiled-coil and C2 domain containing 1B(CC2D1B)
CC2D1A	coiled-coil and C2 domain containing 1A(CC2D1A)
AGO4	argonaute 4, RISC catalytic component(AGO4)
ELMOD2	ELMO domain containing 2(ELMOD2)
POLR3G	RNA polymerase III subunit G(POLR3G)
POLR3F	RNA polymerase III subunit F(POLR3F)
ITPR1	inositol 1,4,5-trisphosphate receptor type 1(ITPR1)
CAPRIN1	cell cycle associated protein 1(CAPRIN1)
CAPRIN2	caprin family member 2(CAPRIN2)
PAPOLA	poly(A) polymerase alpha(PAPOLA)
ADCY9	adenylate cyclase 9(ADCY9)
ERBB2IP	erbb2 interacting protein(ERBB2IP)
PSMD11	proteasome 26S subunit, non-ATPase 11(PSMD11)
CDON	cell adhesion associated, oncogene regulated(CDON)
CLEC3A	C-type lectin domain family 3 member A(CLEC3A)
SLC50A1	solute carrier family 50 member 1(SLC50A1)
MEX3D	mex-3 RNA binding family member D(MEX3D)
PAPOLG	poly(A) polymerase gamma(PAPOLG)
BAMBI	BMP and activin membrane bound inhibitor(BAMBI)
FAM126B	family with sequence similarity 126 member B(FAM126B)
TOB2	transducer of ERBB2, 2(TOB2)
TP53INP2	tumor protein p53 inducible nuclear protein 2(TP53INP2)
CALM2	calmodulin 2(CALM2)
GREB1L	growth regulation by estrogen in breast cancer 1 like(GREB1L)
CALM1	calmodulin 1(CALM1)
FGF18	fibroblast growth factor 18(FGF18)
MAEA	macrophage erythroblast attacher(MAEA)
FGF14	fibroblast growth factor 14(FGF14)
CCDC85A	coiled-coil domain containing 85A(CCDC85A)
ITPKC	inositol-trisphosphate 3-kinase C(ITPKC)
FGF12	fibroblast growth factor 12(FGF12)
ANKRD6	ankyrin repeat domain 6(ANKRD6)
PNN	pinin, desmosome associated protein(PNN)
ESF1	ESF1 nucleolar pre-rRNA processing protein homolog(ESF1)
TBC1D15	TBC1 domain family member 15(TBC1D15)
TBC1D17	TBC1 domain family member 17(TBC1D17)
TIAM1	T-cell lymphoma invasion and metastasis 1(TIAM1)
TBC1D14	TBC1 domain family member 14(TBC1D14)
TBC1D13	TBC1 domain family member 13(TBC1D13)
RNF38	ring finger protein 38(RNF38)
PHOSPHO1	phosphoethanolamine/phosphocholine phosphatase(PHOSPHO1)
SLC4A4	solute carrier family 4 member 4(SLC4A4)
ITPK1	inositol-tetrakisphosphate 1-kinase(ITPK1)
SCAMP5	secretory carrier membrane protein 5(SCAMP5)
ARGLU1	arginine and glutamate rich 1(ARGLU1)
PID1	phosphotyrosine interaction domain containing 1(PID1)
SATB1	SATB homeobox 1(SATB1)
FUT11	fucosyltransferase 11(FUT11)
SOCS5	suppressor of cytokine signaling 5(SOCS5)
TRERF1	transcriptional regulating factor 1(TRERF1)
TBC1D22A	TBC1 domain family member 22A(TBC1D22A)
GNS	glucosamine (N-acetyl)-6-sulfatase(GNS)
SLITRK2	SLIT and NTRK like family member 2(SLITRK2)
HOXD8	homeobox D8(HOXD8)
PI4K2A	phosphatidylinositol 4-kinase type 2 alpha(PI4K2A)
KDSR	3-ketodihydrosphingosine reductase(KDSR)
CPD	carboxypeptidase D(CPD)
VPS26A	VPS26, retromer complex component A(VPS26A)
MYNN	myoneurin(MYNN)
KALRN	kalirin, RhoGEF kinase(KALRN)
SRI	sorcin(SRI)
DERL2	derlin 2(DERL2)
TSHZ1	teashirt zinc finger homeobox 1(TSHZ1)
DERL1	derlin 1(DERL1)
SRM	spermidine synthase(SRM)
ONECUT1	one cut homeobox 1(ONECUT1)
ONECUT2	one cut homeobox 2(ONECUT2)
DSCAML1	DS cell adhesion molecule like 1(DSCAML1)
ATP6V1B2	ATPase H+ transporting V1 subunit B2(ATP6V1B2)
WT1	Wilms tumor 1(WT1)
SLC30A1	solute carrier family 30 member 1(SLC30A1)
PPL	periplakin(PPL)
RNF10	ring finger protein 10(RNF10)
SPIDR	scaffolding protein involved in DNA repair(SPIDR)
STRBP	spermatid perinuclear RNA binding protein(STRBP)
MFAP3L	microfibrillar associated protein 3 like(MFAP3L)
TBC1D30	TBC1 domain family member 30(TBC1D30)
AXIN2	axin 2(AXIN2)
SLC30A9	solute carrier family 30 member 9(SLC30A9)
SLC30A6	solute carrier family 30 member 6(SLC30A6)
SLC30A7	solute carrier family 30 member 7(SLC30A7)
PTPN9	protein tyrosine phosphatase, non-receptor type 9(PTPN9)
TBC1D2B	TBC1 domain family member 2B(TBC1D2B)
ZMYM2	zinc finger MYM-type containing 2(ZMYM2)
PTPN3	protein tyrosine phosphatase, non-receptor type 3(PTPN3)
LPP	LIM domain containing preferred translocation partner in lipoma(LPP)
PTPN4	protein tyrosine phosphatase, non-receptor type 4(PTPN4)
DENR	density regulated re-initiation and release factor(DENR)
REEP3	receptor accessory protein 3(REEP3)
REEP4	receptor accessory protein 4(REEP4)
HOXB7	homeobox B7(HOXB7)
AKTIP	AKT interacting protein(AKTIP)
HOXB8	homeobox B8(HOXB8)
HOXB6	homeobox B6(HOXB6)
HABP4	hyaluronan binding protein 4(HABP4)
AHCYL2	adenosylhomocysteinase like 2(AHCYL2)
TBC1D20	TBC1 domain family member 20(TBC1D20)
GPATCH8	G-patch domain containing 8(GPATCH8)
MYLK	myosin light chain kinase(MYLK)
OPCML	opioid binding protein/cell adhesion molecule like(OPCML)
DPY19L4	dpy-19 like 4 (C. elegans)(DPY19L4)
PAK6	p21 (RAC1) activated kinase 6(PAK6)
ARHGAP5	Rho GTPase activating protein 5(ARHGAP5)
PAK2	p21 (RAC1) activated kinase 2(PAK2)
CAMSAP2	calmodulin regulated spectrin associated protein family member 2(CAMSAP2)
CAMSAP1	calmodulin regulated spectrin associated protein 1(CAMSAP1)
ARHGAP1	Rho GTPase activating protein 1(ARHGAP1)
MOB3B	MOB kinase activator 3B(MOB3B)
ESAM	endothelial cell adhesion molecule(ESAM)
CNTNAP1	contactin associated protein 1(CNTNAP1)
CSK	c-src tyrosine kinase(CSK)
TTC39C	tetratricopeptide repeat domain 39C(TTC39C)
AKT3	AKT serine/threonine kinase 3(AKT3)
PIGA	phosphatidylinositol glycan anchor biosynthesis class A(PIGA)
EGR3	early growth response 3(EGR3)
NOL4	nucleolar protein 4(NOL4)
EGR2	early growth response 2(EGR2)
CNTNAP4	contactin associated protein like 4(CNTNAP4)
NOL9	nucleolar protein 9(NOL9)
SOX12	SRY-box 12(SOX12)
MINK1	misshapen like kinase 1(MINK1)
RASL12	RAS like family 12(RASL12)
ECT2	epithelial cell transforming 2(ECT2)
DNASE2B	deoxyribonuclease 2 beta(DNASE2B)
BVES	blood vessel epicardial substance(BVES)
PSD	pleckstrin and Sec7 domain containing(PSD)
HIPK1	homeodomain interacting protein kinase 1(HIPK1)
HIPK3	homeodomain interacting protein kinase 3(HIPK3)
KIAA0513	KIAA0513 ortholog(KIAA0513)
KPNA4	karyopherin subunit alpha 4(KPNA4)
KIAA1191	KIAA1191 ortholog(KIAA1191)
KPNA3	karyopherin subunit alpha 3(KPNA3)
KPNA2	karyopherin subunit alpha 2(KPNA2)
MELK	maternal embryonic leucine zipper kinase(MELK)
KPNA1	karyopherin subunit alpha 1(KPNA1)
TNFRSF21	TNF receptor superfamily member 21(TNFRSF21)
MOB1A	MOB kinase activator 1A(MOB1A)
RTN4RL1	reticulon 4 receptor like 1(RTN4RL1)
USP9X	ubiquitin specific peptidase 9, X-linked(USP9X)
CALD1	caldesmon 1(CALD1)
LUM	lumican(LUM)
LINGO2	leucine rich repeat and Ig domain containing 2(LINGO2)
N4BP1	NEDD4 binding protein 1(N4BP1)
SH3GLB1	SH3 domain containing GRB2 like endophilin B1(SH3GLB1)
LARS	leucyl-tRNA synthetase(LARS)
PTS	6-pyruvoyltetrahydropterin synthase(PTS)
BAHD1	bromo adjacent homology domain containing 1(BAHD1)
PTPRB	protein tyrosine phosphatase, receptor type B(PTPRB)
CENPO	centromere protein O(CENPO)
PTPRE	protein tyrosine phosphatase, receptor type E(PTPRE)
B3GALT2	beta-1,3-galactosyltransferase 2(B3GALT2)
PTPRA	protein tyrosine phosphatase, receptor type A(PTPRA)
FRMPD4	FERM and PDZ domain containing 4(FRMPD4)
ISOC1	isochorismatase domain containing 1(ISOC1)
CENPK	centromere protein K(CENPK)
AMPD3	adenosine monophosphate deaminase 3(AMPD3)
ATXN7L3	ataxin 7 like 3(ATXN7L3)
RUFY2	RUN and FYVE domain containing 2(RUFY2)
GPI	glucose-6-phosphate isomerase(GPI)
RNF43	ring finger protein 43(RNF43)
SON	SON DNA binding protein(SON)
SP1	Sp1 transcription factor(SP1)
SP3	Sp3 transcription factor(SP3)
SP4	Sp4 transcription factor(SP4)
SUMF1	sulfatase modifying factor 1(SUMF1)
ANXA13	annexin A13(ANXA13)
CRK	CRK proto-oncogene, adaptor protein(CRK)
TCP11L1	t-complex 11 like 1(TCP11L1)
NFIB	nuclear factor I B(NFIB)
SGMS2	sphingomyelin synthase 2(SGMS2)
PPP2R5B	protein phosphatase 2 regulatory subunit B'beta(PPP2R5B)
PPP2R5C	protein phosphatase 2 regulatory subunit B'gamma(PPP2R5C)
MYLIP	myosin regulatory light chain interacting protein(MYLIP)
REST	RE1 silencing transcription factor(REST)
FAM210A	family with sequence similarity 210 member A(FAM210A)
CUL3	cullin 3(CUL3)
CUL2	cullin 2(CUL2)
EPC2	enhancer of polycomb homolog 2(EPC2)
MED28	mediator complex subunit 28(MED28)
MED26	mediator complex subunit 26(MED26)
ILK	integrin linked kinase(ILK)
CCR10	C-C motif chemokine receptor 10(CCR10)
YEATS2	YEATS domain containing 2(YEATS2)
ZNF106	zinc finger protein 106(ZNF106)
PIK3CB	phosphatidylinositol-4,5-bisphosphate 3-kinase catalytic subunit beta(PIK3CB)
KIF5A	kinesin family member 5A(KIF5A)
PDPN	podoplanin(PDPN)
TAF4B	TATA-box binding protein associated factor 4b(TAF4B)
MYLK4	myosin light chain kinase family member 4(MYLK4)
KIF5C	kinesin family member 5C(KIF5C)
MECP2	methyl-CpG binding protein 2(MECP2)
GRIN2A	glutamate ionotropic receptor NMDA type subunit 2A(GRIN2A)
MYH9	myosin heavy chain 9(MYH9)
TOX3	TOX high mobility group box family member 3(TOX3)
TMEM131	transmembrane protein 131(TMEM131)
KIAA1522	KIAA1522 ortholog(KIAA1522)
MAPK1	mitogen-activated protein kinase 1(MAPK1)
F3	coagulation factor III, tissue factor(F3)
MAPK4	mitogen-activated protein kinase 4(MAPK4)
BACE1	beta-secretase 1(BACE1)
F2	coagulation factor II (thrombin)(F2)
RYR2	ryanodine receptor 2(RYR2)
CHORDC1	cysteine and histidine rich domain containing 1(CHORDC1)
SH3GL2	SH3 domain containing GRB2 like 2, endophilin A1(SH3GL2)
DCBLD2	discoidin, CUB and LCCL domain containing 2(DCBLD2)
RAD23B	RAD23 homolog B, nucleotide excision repair protein(RAD23B)
KIAA1109	KIAA1109 ortholog(KIAA1109)
PPP2R3A	protein phosphatase 2 regulatory subunit B''alpha(PPP2R3A)
BCL2L2	BCL2 like 2(BCL2L2)
ARF6	ADP ribosylation factor 6(ARF6)
CHCHD4	coiled-coil-helix-coiled-coil-helix domain containing 4(CHCHD4)
RIC3	RIC3 acetylcholine receptor chaperone(RIC3)
ARFGEF2	ADP ribosylation factor guanine nucleotide exchange factor 2(ARFGEF2)
ARFGEF1	ADP ribosylation factor guanine nucleotide exchange factor 1(ARFGEF1)
SCRIB	scribbled planar cell polarity protein(SCRIB)
ALCAM	activated leukocyte cell adhesion molecule(ALCAM)
TMEM127	transmembrane protein 127(TMEM127)
SLC29A2	solute carrier family 29 member 2(SLC29A2)
TMEM50A	transmembrane protein 50A(TMEM50A)
UBASH3B	ubiquitin associated and SH3 domain containing B(UBASH3B)
SPATS2	spermatogenesis associated serine rich 2(SPATS2)
FGL2	fibrinogen like 2(FGL2)
UBASH3A	ubiquitin associated and SH3 domain containing A(UBASH3A)
PABPC1	poly(A) binding protein cytoplasmic 1(PABPC1)
SGIP1	SH3-domain GRB2-like (endophilin) interacting protein 1(SGIP1)
ASXL2	additional sex combs like 2, transcriptional regulator(ASXL2)
KIF3B	kinesin family member 3B(KIF3B)
KIF3A	kinesin family member 3A(KIF3A)
LAPTM4A	lysosomal protein transmembrane 4 alpha(LAPTM4A)
FAM131B	family with sequence similarity 131 member B(FAM131B)
SRSF3	serine and arginine rich splicing factor 3(SRSF3)
SRSF6	serine and arginine rich splicing factor 6(SRSF6)
ARF3	ADP ribosylation factor 3(ARF3)
ARF4	ADP ribosylation factor 4(ARF4)
BTBD10	BTB domain containing 10(BTBD10)
SMURF2	SMAD specific E3 ubiquitin protein ligase 2(SMURF2)
SMURF1	SMAD specific E3 ubiquitin protein ligase 1(SMURF1)
SRSF1	serine and arginine rich splicing factor 1(SRSF1)
TAF1B	TATA-box binding protein associated factor, RNA polymerase I subunit B(TAF1B)
BACH2	BTB domain and CNC homolog 2(BACH2)
LDLR	low density lipoprotein receptor(LDLR)
ZNF532	zinc finger protein 532(ZNF532)
FGF9	fibroblast growth factor 9(FGF9)
KCNAB1	potassium voltage-gated channel subfamily A member regulatory beta subunit 1(KCNAB1)
SLC20A2	solute carrier family 20 member 2(SLC20A2)
DPP10	dipeptidyl peptidase like 10(DPP10)
NBEA	neurobeachin(NBEA)
EIF2D	eukaryotic translation initiation factor 2D(EIF2D)
LNPEP	leucyl and cystinyl aminopeptidase(LNPEP)
ST6GALNAC6	ST6 N-acetylgalactosaminide alpha-2,6-sialyltransferase 6(ST6GALNAC6)
TMEM109	transmembrane protein 109(TMEM109)
ST6GALNAC3	ST6 N-acetylgalactosaminide alpha-2,6-sialyltransferase 3(ST6GALNAC3)
MAP1LC3A	microtubule associated protein 1 light chain 3 alpha(MAP1LC3A)
EPG5	ectopic P-granules autophagy protein 5 homolog(EPG5)
TMEM100	transmembrane protein 100(TMEM100)
KDELR1	KDEL endoplasmic reticulum protein retention receptor 1(KDELR1)
SPIN4	spindlin family member 4(SPIN4)
IHH	indian hedgehog(IHH)
RAP2A	RAP2A, member of RAS oncogene family(RAP2A)
SH3PXD2A	SH3 and PX domains 2A(SH3PXD2A)
PKDCC	protein kinase domain containing, cytoplasmic(PKDCC)
CARD10	caspase recruitment domain family member 10(CARD10)
MYCN	v-myc avian myelocytomatosis viral oncogene neuroblastoma derived homolog(MYCN)
MTMR12	myotubularin related protein 12(MTMR12)
EPB41L1	erythrocyte membrane protein band 4.1 like 1(EPB41L1)
BNIP2	BCL2 interacting protein 2(BNIP2)
DOK6	docking protein 6(DOK6)
CLIC5	chloride intracellular channel 5(CLIC5)
MTMR10	myotubularin related protein 10(MTMR10)
VCAN	versican(VCAN)
ZMYND11	zinc finger MYND-type containing 11(ZMYND11)
RABGAP1	RAB GTPase activating protein 1(RABGAP1)
EXOC8	exocyst complex component 8(EXOC8)
OPRK1	opioid receptor kappa 1(OPRK1)
ABI1	abl interactor 1(ABI1)
EPB41L4B	erythrocyte membrane protein band 4.1 like 4B(EPB41L4B)
SPO11	SPO11, initiator of meiotic double stranded breaks(SPO11)
KIAA1147	KIAA1147 ortholog(KIAA1147)
SFR1	SWI5 dependent homologous recombination repair protein 1(SFR1)
ACSL1	acyl-CoA synthetase long-chain family member 1(ACSL1)
SNRK	SNF related kinase(SNRK)
LRRTM1	leucine rich repeat transmembrane neuronal 1(LRRTM1)
NPAT	nuclear protein, ataxia-telangiectasia locus(NPAT)
PPP3CB	protein phosphatase 3 catalytic subunit beta(PPP3CB)
EXOC5	exocyst complex component 5(EXOC5)
ACSL4	acyl-CoA synthetase long-chain family member 4(ACSL4)
LMLN	leishmanolysin like peptidase(LMLN)
NBEAL1	neurobeachin like 1(NBEAL1)
PRSS12	protease, serine 12(PRSS12)
ETFA	electron transfer flavoprotein alpha subunit(ETFA)
PDK1	pyruvate dehydrogenase kinase 1(PDK1)
SRRD	SRR1 domain containing(SRRD)
UPF2	UPF2 regulator of nonsense transcripts homolog (yeast)(UPF2)
SLC8A1	solute carrier family 8 member A1(SLC8A1)
SLC8A2	solute carrier family 8 member A2(SLC8A2)
PDK4	pyruvate dehydrogenase kinase 4(PDK4)
SPTY2D1	SPT2 chromatin protein domain containing 1(SPTY2D1)
APPL1	adaptor protein, phosphotyrosine interacting with PH domain and leucine zipper 1(APPL1)
CDH13	cadherin 13(CDH13)
CDH18	cadherin 18(CDH18)
PRSS23	protease, serine 23(PRSS23)
WNT7A	Wnt family member 7A(WNT7A)
RAB9B	RAB9B, member RAS oncogene family(RAB9B)
LMO3	LIM domain only 3(LMO3)
HBS1L	HBS1 like translational GTPase(HBS1L)
INO80	INO80 complex subunit(INO80)
TCEAL7	transcription elongation factor A like 7(TCEAL7)
TXLNA	taxilin alpha(TXLNA)
IL17RD	interleukin 17 receptor D(IL17RD)
TCEAL1	transcription elongation factor A like 1(TCEAL1)
FDFT1	farnesyl-diphosphate farnesyltransferase 1(FDFT1)
SEZ6L2	seizure related 6 homolog like 2(SEZ6L2)
MFF	mitochondrial fission factor(MFF)
GHITM	growth hormone inducible transmembrane protein(GHITM)
UBXN2A	UBX domain protein 2A(UBXN2A)
UBXN2B	UBX domain protein 2B(UBXN2B)
PMS2	PMS1 homolog 2, mismatch repair system component(PMS2)
FNDC3B	fibronectin type III domain containing 3B(FNDC3B)
BEND3	BEN domain containing 3(BEND3)
STIM2	stromal interaction molecule 2(STIM2)
STIM1	stromal interaction molecule 1(STIM1)
YTHDF2	YTH N6-methyladenosine RNA binding protein 2(YTHDF2)
YTHDF3	YTH N6-methyladenosine RNA binding protein 3(YTHDF3)
PNPLA6	patatin like phospholipase domain containing 6(PNPLA6)
CCDC6	coiled-coil domain containing 6(CCDC6)
ANKRD13C	ankyrin repeat domain 13C(ANKRD13C)
PRCC	papillary renal cell carcinoma (translocation-associated)(PRCC)
TMEM106A	transmembrane protein 106A(TMEM106A)
TESK2	testis-specific kinase 2(TESK2)
MGA	MGA, MAX dimerization protein(MGA)
RELN	reelin(RELN)
PDCD6IP	programmed cell death 6 interacting protein(PDCD6IP)
VAMP2	vesicle associated membrane protein 2(VAMP2)
VAMP1	vesicle associated membrane protein 1(VAMP1)
EDA	ectodysplasin A(EDA)
HMX3	H6 family homeobox 3(HMX3)
FGD1	FYVE, RhoGEF and PH domain containing 1(FGD1)
ARFGAP2	ADP ribosylation factor GTPase activating protein 2(ARFGAP2)
LITAF	lipopolysaccharide induced TNF factor(LITAF)
ABCA1	ATP binding cassette subfamily A member 1(ABCA1)
ABI3BP	ABI family member 3 binding protein(ABI3BP)
ABCA5	ATP binding cassette subfamily A member 5(ABCA5)
TTC1	tetratricopeptide repeat domain 1(TTC1)
MEIS2	Meis homeobox 2(MEIS2)
SYAP1	synapse associated protein 1(SYAP1)
PPIL4	peptidylprolyl isomerase like 4(PPIL4)
SLC35F3	solute carrier family 35 member F3(SLC35F3)
SLC35F5	solute carrier family 35 member F5(SLC35F5)
FGD5	FYVE, RhoGEF and PH domain containing 5(FGD5)
DNAJA2	DnaJ heat shock protein family (Hsp40) member A2(DNAJA2)
FGD4	FYVE, RhoGEF and PH domain containing 4(FGD4)
UBXN10	UBX domain protein 10(UBXN10)
EHMT1	euchromatic histone lysine methyltransferase 1(EHMT1)
MET	MET proto-oncogene, receptor tyrosine kinase(MET)
NR4A2	nuclear receptor subfamily 4 group A member 2(NR4A2)
GLOD5	glyoxalase domain containing 5(GLOD5)
NR4A3	nuclear receptor subfamily 4 group A member 3(NR4A3)
EHMT2	euchromatic histone lysine methyltransferase 2(EHMT2)
MYPOP	Myb related transcription factor, partner of profilin(MYPOP)
ABCB7	ATP binding cassette subfamily B member 7(ABCB7)
FURIN	furin, paired basic amino acid cleaving enzyme(FURIN)
TPBG	trophoblast glycoprotein(TPBG)
CYB561	cytochrome b-561(CYB561)
R3HDM1	R3H domain containing 1(R3HDM1)
P2RX4	purinergic receptor P2X 4(P2RX4)
DSG4	desmoglein 4(DSG4)
DNAJB9	DnaJ heat shock protein family (Hsp40) member B9(DNAJB9)
CXCL14	C-X-C motif chemokine ligand 14(CXCL14)
SLC35G1	solute carrier family 35, member G1(SLC35G1)
FREM2	FRAS1 related extracellular matrix protein 2(FREM2)
EBF1	early B-cell factor 1(EBF1)
SLC13A2	solute carrier family 13 member 2(SLC13A2)
DNAJB2	DnaJ heat shock protein family (Hsp40) member B2(DNAJB2)
SLC13A3	solute carrier family 13 member 3(SLC13A3)
DNAJB1	DnaJ heat shock protein family (Hsp40) member B1(DNAJB1)
IKBKB	inhibitor of kappa light polypeptide gene enhancer in B-cells, kinase beta(IKBKB)
DNAJB4	DnaJ heat shock protein family (Hsp40) member B4(DNAJB4)
ABL2	ABL proto-oncogene 2, non-receptor tyrosine kinase(ABL2)
PTGES3	prostaglandin E synthase 3(PTGES3)
KIF27	kinesin family member 27(KIF27)
CDC14B	cell division cycle 14B(CDC14B)
AMMECR1	Alport syndrome, mental retardation, midface hypoplasia and elliptocytosis chromosomal region gene 1(AMMECR1)
SPRY4	sprouty RTK signaling antagonist 4(SPRY4)
SPRY2	sprouty RTK signaling antagonist 2(SPRY2)
SPRY1	sprouty RTK signaling antagonist 1(SPRY1)
WISP1	WNT1 inducible signaling pathway protein 1(WISP1)
PLRG1	pleiotropic regulator 1(PLRG1)
LACE1	lactation elevated 1(LACE1)
DSEL	dermatan sulfate epimerase-like(DSEL)
LRRFIP2	LRR binding FLII interacting protein 2(LRRFIP2)
SLC43A2	solute carrier family 43 member 2(SLC43A2)
SPECC1L	sperm antigen with calponin homology and coiled-coil domains 1 like(SPECC1L)
ARL2	ADP ribosylation factor like GTPase 2(ARL2)
PTGER4	prostaglandin E receptor 4(PTGER4)
ZNF280D	zinc finger protein 280D(ZNF280D)
IRF2BP2	interferon regulatory factor 2 binding protein 2(IRF2BP2)
ARL3	ADP ribosylation factor like GTPase 3(ARL3)
MAN2A1	mannosidase alpha class 2A member 1(MAN2A1)
KIF1B	kinesin family member 1B(KIF1B)
SLC35E1	solute carrier family 35 member E1(SLC35E1)
CLDN1	claudin 1(CLDN1)
CNTN2	contactin 2(CNTN2)
CNTN1	contactin 1(CNTN1)
TXNRD1	thioredoxin reductase 1(TXNRD1)
CNTN3	contactin 3(CNTN3)
HAUS8	HAUS augmin like complex subunit 8(HAUS8)
PMEPA1	prostate transmembrane protein, androgen induced 1(PMEPA1)
CYP2U1	cytochrome P450, family 2, subfamily U, polypeptide 1(CYP2U1)
GDAP1	ganglioside induced differentiation associated protein 1(GDAP1)
EGLN3	egl-9 family hypoxia inducible factor 3(EGLN3)
GRAMD3	GRAM domain containing 3(GRAMD3)
GRAMD4	GRAM domain containing 4(GRAMD4)
FAM13A	family with sequence similarity 13 member A(FAM13A)
FAM13C	family with sequence similarity 13 member C(FAM13C)
HIC1	HIC ZBTB transcriptional repressor 1(HIC1)
SMOC2	SPARC related modular calcium binding 2(SMOC2)
SMOC1	SPARC related modular calcium binding 1(SMOC1)
NFATC3	nuclear factor of activated T-cells 3(NFATC3)
KL	klotho(KL)
MAK	male germ cell associated kinase(MAK)
SCRN1	secernin 1(SCRN1)
RAF1	Raf-1 proto-oncogene, serine/threonine kinase(RAF1)
KY	kyphoscoliosis peptidase(KY)
XPNPEP1	X-prolyl aminopeptidase 1(XPNPEP1)
MEMO1	mediator of cell motility 1(MEMO1)
TMEM55B	transmembrane protein 55B(TMEM55B)
TMEM55A	transmembrane protein 55A(TMEM55A)
GDF11	growth differentiation factor 11(GDF11)
DENND4C	DENN domain containing 4C(DENND4C)
GDF5	growth differentiation factor 5(GDF5)
LPAR3	lysophosphatidic acid receptor 3(LPAR3)
RAB1B	RAB1B, member RAS oncogene family(RAB1B)
LUZP1	leucine zipper protein 1(LUZP1)
EDIL3	EGF like repeats and discoidin domains 3(EDIL3)
PRKG2	protein kinase, cGMP-dependent, type II(PRKG2)
PRKG1	protein kinase, cGMP-dependent, type I(PRKG1)
TPD52	tumor protein D52(TPD52)
UXS1	UDP-glucuronate decarboxylase 1(UXS1)
TMEM151B	transmembrane protein 151B(TMEM151B)
PRKX	protein kinase, X-linked(PRKX)
ATP2B2	ATPase plasma membrane Ca2+ transporting 2(ATP2B2)
VPS13D	vacuolar protein sorting 13 homolog D(VPS13D)
COL12A1	collagen type XII alpha 1 chain(COL12A1)
NSMAF	neutral sphingomyelinase activation associated factor(NSMAF)
MATN2	matrilin 2(MATN2)
GTPBP1	GTP binding protein 1(GTPBP1)
GTPBP3	GTP binding protein 3 (mitochondrial)(GTPBP3)
VANGL1	VANGL planar cell polarity protein 1(VANGL1)
OPTN	optineurin(OPTN)
SCEL	sciellin(SCEL)
LETM1	leucine zipper and EF-hand containing transmembrane protein 1(LETM1)
PRDM4	PR/SET domain 4(PRDM4)
MTF1	metal regulatory transcription factor 1(MTF1)
LRCH2	leucine rich repeats and calponin homology domain containing 2(LRCH2)
TANC2	tetratricopeptide repeat, ankyrin repeat and coiled-coil containing 2(TANC2)
PRDM6	PR/SET domain 6(PRDM6)
MLLT10	myeloid/lymphoid or mixed-lineage leukemia; translocated to, 10(MLLT10)
RAB14	RAB14, member RAS oncogene family(RAB14)
NPTN	neuroplastin(NPTN)
TUBA4A	tubulin alpha 4a(TUBA4A)
TGFBRAP1	transforming growth factor beta receptor associated protein 1(TGFBRAP1)
KIF26B	kinesin family member 26B(KIF26B)
CHKA	choline kinase alpha(CHKA)
CLCN3	chloride voltage-gated channel 3(CLCN3)
EPHB3	EPH receptor B3(EPHB3)
RIMS2	regulating synaptic membrane exocytosis 2(RIMS2)
OCRL	OCRL, inositol polyphosphate-5-phosphatase(OCRL)
PEX5L	peroxisomal biogenesis factor 5 like(PEX5L)
HNRNPA3	heterogeneous nuclear ribonucleoprotein A3(HNRNPA3)
TCF21	transcription factor 21(TCF21)
NAA50	N(alpha)-acetyltransferase 50, NatE catalytic subunit(NAA50)
SUPV3L1	Suv3 like RNA helicase(SUPV3L1)
LHX6	LIM homeobox 6(LHX6)
BCOR	BCL6 corepressor(BCOR)
LHX8	LIM homeobox 8(LHX8)
OLFM3	olfactomedin 3(OLFM3)
FCHO2	FCH domain only 2(FCHO2)
LHX9	LIM homeobox 9(LHX9)
BLNK	B-cell linker(BLNK)
KLF5	Kruppel like factor 5(KLF5)
ZBTB47	zinc finger and BTB domain containing 47(ZBTB47)
GDE1	glycerophosphodiester phosphodiesterase 1(GDE1)
HPCAL4	hippocalcin like 4(HPCAL4)
RYBP	RING1 and YY1 binding protein(RYBP)
ZBTB41	zinc finger and BTB domain containing 41(ZBTB41)
CELSR2	cadherin EGF LAG seven-pass G-type receptor 2(CELSR2)
TRAPPC3L	trafficking protein particle complex 3 like(TRAPPC3L)
ZBTB44	zinc finger and BTB domain containing 44(ZBTB44)
EPHA1	EPH receptor A1(EPHA1)
ZBTB43	zinc finger and BTB domain containing 43(ZBTB43)
HNRNPA0	heterogeneous nuclear ribonucleoprotein A0(HNRNPA0)
NCKAP1	NCK associated protein 1(NCKAP1)
PXDNL	peroxidasin like(PXDNL)
EPHA5	EPH receptor A5(EPHA5)
EPHA4	EPH receptor A4(EPHA4)
RNF6	ring finger protein 6(RNF6)
EPHA7	EPH receptor A7(EPHA7)
EPHA6	EPH receptor A6(EPHA6)
ATP2A2	ATPase sarcoplasmic/endoplasmic reticulum Ca2+ transporting 2(ATP2A2)
RNF4	ring finger protein 4(RNF4)
IRF2BPL	interferon regulatory factor 2 binding protein like(IRF2BPL)
RNF2	ring finger protein 2(RNF2)
CNIH1	cornichon family AMPA receptor auxiliary protein 1(CNIH1)
GOSR1	golgi SNAP receptor complex member 1(GOSR1)
KLF1	Kruppel like factor 1(KLF1)
NCOR1	nuclear receptor corepressor 1(NCOR1)
TCF15	transcription factor 15 (basic helix-loop-helix)(TCF15)
CLCN4	chloride voltage-gated channel 4(CLCN4)
KLF3	Kruppel like factor 3(KLF3)
CLCN5	chloride voltage-gated channel 5(CLCN5)
PPARA	peroxisome proliferator activated receptor alpha(PPARA)
ZBTB33	zinc finger and BTB domain containing 33(ZBTB33)
RAB5B	RAB5B, member RAS oncogene family(RAB5B)
NPNT	nephronectin(NPNT)
PPARG	peroxisome proliferator activated receptor gamma(PPARG)
ZBTB39	zinc finger and BTB domain containing 39(ZBTB39)
FERMT1	fermitin family member 1(FERMT1)
SHOC2	SHOC2, leucine rich repeat scaffold protein(SHOC2)
KCNJ10	potassium voltage-gated channel subfamily J member 10(KCNJ10)
HELZ	helicase with zinc finger(HELZ)
KCNJ12	potassium voltage-gated channel subfamily J member 12(KCNJ12)
CANX	calnexin(CANX)
KCNIP3	Kv channel interacting protein 3, calsenilin(KCNIP3)
ATG2B	autophagy related 2B(ATG2B)
ART4	ADP-ribosyltransferase 4 (Dombrock blood group)(ART4)
ART3	ADP-ribosyltransferase 3(ART3)
DIP2A	disco interacting protein 2 homolog A(DIP2A)
SLC24A4	solute carrier family 24 member 4(SLC24A4)
SLC24A3	solute carrier family 24 member 3(SLC24A3)
GPX5	glutathione peroxidase 5(GPX5)
SLC24A2	solute carrier family 24 member 2(SLC24A2)
ATG2A	autophagy related 2A(ATG2A)
GOLGA1	golgin A1(GOLGA1)
NSMCE2	non-SMC element 2, MMS21 homolog (S. cerevisiae)(NSMCE2)
NEURL1B	neuralized E3 ubiquitin protein ligase 1B(NEURL1B)
GOLGA4	golgin A4(GOLGA4)
GOLGA3	golgin A3(GOLGA3)
ZBTB20	zinc finger and BTB domain containing 20(ZBTB20)
RBBP4	RB binding protein 4, chromatin remodeling factor(RBBP4)
SCAI	suppressor of cancer cell invasion(SCAI)
RBBP7	RB binding protein 7, chromatin remodeling factor(RBBP7)
ZBTB26	zinc finger and BTB domain containing 26(ZBTB26)
RBBP6	RB binding protein 6, ubiquitin ligase(RBBP6)
MBD1	methyl-CpG binding domain protein 1(MBD1)
POGLUT1	protein O-glucosyltransferase 1(POGLUT1)
RBBP8	RB binding protein 8, endonuclease(RBBP8)
ZDHHC15	zinc finger DHHC-type containing 15(ZDHHC15)
EFHC2	EF-hand domain containing 2(EFHC2)
RAB11FIP5	RAB11 family interacting protein 5(RAB11FIP5)
GRM4	glutamate metabotropic receptor 4(GRM4)
GRM3	glutamate metabotropic receptor 3(GRM3)
BLMH	bleomycin hydrolase(BLMH)
RAB11FIP2	RAB11 family interacting protein 2(RAB11FIP2)
GRM8	glutamate metabotropic receptor 8(GRM8)
MB21D2	Mab-21 domain containing 2(MB21D2)
RAB11FIP1	RAB11 family interacting protein 1(RAB11FIP1)
CHL1	cell adhesion molecule L1 like(CHL1)
PPFIA2	PTPRF interacting protein alpha 2(PPFIA2)
TRIOBP	TRIO and F-actin binding protein(TRIOBP)
SLC39A14	solute carrier family 39 member 14(SLC39A14)
RAB3B	RAB3B, member RAS oncogene family(RAB3B)
ATG12	autophagy related 12(ATG12)
SLC39A10	solute carrier family 39 member 10(SLC39A10)
ZBTB10	zinc finger and BTB domain containing 10(ZBTB10)
ZBTB11	zinc finger and BTB domain containing 11(ZBTB11)
ATG13	autophagy related 13(ATG13)
PPP6R1	protein phosphatase 6 regulatory subunit 1(PPP6R1)
ZBTB14	zinc finger and BTB domain containing 14(ZBTB14)
FKBP1A	FK506 binding protein 1A(FKBP1A)
PPP6R3	protein phosphatase 6 regulatory subunit 3(PPP6R3)
PPP6R2	protein phosphatase 6 regulatory subunit 2(PPP6R2)
ZBTB18	zinc finger and BTB domain containing 18(ZBTB18)
RPP14	ribonuclease P/MRP subunit p14(RPP14)
PHIP	pleckstrin homology domain interacting protein(PHIP)
ZDHHC23	zinc finger DHHC-type containing 23(ZDHHC23)
BCL2	BCL2, apoptosis regulator(BCL2)
ETV1	ETS variant 1(ETV1)
PRKAA1	protein kinase AMP-activated catalytic subunit alpha 1(PRKAA1)
PEX13	peroxisomal biogenesis factor 13(PEX13)
PRKAA2	protein kinase AMP-activated catalytic subunit alpha 2(PRKAA2)
MLLT6	MLLT6, PHD finger domain containing(MLLT6)
KIF21A	kinesin family member 21A(KIF21A)
ETV6	ETS variant 6(ETV6)
FYCO1	FYVE and coiled-coil domain containing 1(FYCO1)
BCL9	B-cell CLL/lymphoma 9(BCL9)
MLLT3	MLLT3, super elongation complex subunit(MLLT3)
LY75	lymphocyte antigen 75(LY75)
NLGN1	neuroligin 1(NLGN1)
HSPG2	heparan sulfate proteoglycan 2(HSPG2)
BIRC6	baculoviral IAP repeat containing 6(BIRC6)
AMBRA1	autophagy and beclin 1 regulator 1(AMBRA1)
HNRNPDL	heterogeneous nuclear ribonucleoprotein D like(HNRNPDL)
GABARAP	GABA type A receptor-associated protein(GABARAP)
SOD2	superoxide dismutase 2, mitochondrial(SOD2)
TEX12	testis expressed 12(TEX12)
YWHAH	tyrosine 3-monooxygenase/tryptophan 5-monooxygenase activation protein eta(YWHAH)
TOM1L2	target of myb1 like 2 membrane trafficking protein(TOM1L2)
RAB34	RAB34, member RAS oncogene family(RAB34)
YWHAQ	tyrosine 3-monooxygenase/tryptophan 5-monooxygenase activation protein theta(YWHAQ)
CHN2	chimerin 2(CHN2)
TMTC3	transmembrane and tetratricopeptide repeat containing 3(TMTC3)
TMTC2	transmembrane and tetratricopeptide repeat containing 2(TMTC2)
APBB2	amyloid beta precursor protein binding family B member 2(APBB2)
VLDLR	very low density lipoprotein receptor(VLDLR)
CAST	calpastatin(CAST)
TUFT1	tuftelin 1(TUFT1)
CASK	calcium/calmodulin dependent serine protein kinase(CASK)
ILDR2	immunoglobulin like domain containing receptor 2(ILDR2)
FLCN	folliculin(FLCN)
DSE	dermatan sulfate epimerase(DSE)
SMNDC1	survival motor neuron domain containing 1(SMNDC1)
GATA2	GATA binding protein 2(GATA2)
GATA6	GATA binding protein 6(GATA6)
ARL15	ADP ribosylation factor like GTPase 15(ARL15)
ZNF185	zinc finger protein 185 (LIM domain)(ZNF185)
SS18L1	SS18L1, nBAF chromatin remodeling complex subunit(SS18L1)
GABPB2	GA binding protein transcription factor beta subunit 2(GABPB2)
CASKIN1	CASK interacting protein 1(CASKIN1)
C2CD2	C2 calcium dependent domain containing 2(C2CD2)
C2CD5	C2 calcium dependent domain containing 5(C2CD5)
SLC22A23	solute carrier family 22 member 23(SLC22A23)
PRKAB2	protein kinase, AMP-activated, beta 2 non-catalytic subunit(PRKAB2)
HRK	harakiri, BCL2 interacting protein(HRK)
TNKS2	tankyrase, TRF1-interacting ankyrin-related ADP-ribose polymerase 2(TNKS2)
CBLN4	cerebellin 4 precursor(CBLN4)
NDEL1	nudE neurodevelopment protein 1 like 1(NDEL1)
FNBP1L	formin binding protein 1 like(FNBP1L)
CLIP1	CAP-Gly domain containing linker protein 1(CLIP1)
AKAP1	A-kinase anchoring protein 1(AKAP1)
CLIP4	CAP-Gly domain containing linker protein family member 4(CLIP4)
AKAP2	A kinase (PRKA) anchor protein 2(AKAP2)
ASB7	ankyrin repeat and SOCS box containing 7(ASB7)
DIAPH2	diaphanous related formin 2(DIAPH2)
SNX8	sorting nexin 8(SNX8)
ADCYAP1R1	ADCYAP receptor type I(ADCYAP1R1)
SNX7	sorting nexin 7(SNX7)
DIAPH3	diaphanous related formin 3(DIAPH3)
SSH2	slingshot protein phosphatase 2(SSH2)
SNX2	sorting nexin 2(SNX2)
SNX3	sorting nexin 3(SNX3)
RRAGD	Ras related GTP binding D(RRAGD)
COMMD8	COMM domain containing 8(COMMD8)
ZC3H6	zinc finger CCCH-type containing 6(ZC3H6)
CSMD1	CUB and Sushi multiple domains 1(CSMD1)
ZFC3H1	zinc finger C3H1-type containing(ZFC3H1)
PRR7	proline rich 7, synaptic(PRR7)
CORO2B	coronin 2B(CORO2B)
IRAK3	interleukin 1 receptor associated kinase 3(IRAK3)
CORO2A	coronin 2A(CORO2A)
EIF3A	eukaryotic translation initiation factor 3 subunit A(EIF3A)
ITGB8	integrin subunit beta 8(ITGB8)
ITGAV	integrin subunit alpha V(ITGAV)
ITGB6	integrin subunit beta 6(ITGB6)
RHOBTB2	Rho-related BTB domain containing 2(RHOBTB2)
HEG1	heart development protein with EGF like domains 1(HEG1)
ITGA1	integrin subunit alpha 1(ITGA1)
ITGA4	integrin subunit alpha 4(ITGA4)
EIF4B	eukaryotic translation initiation factor 4B(EIF4B)
ITGA9	integrin subunit alpha 9(ITGA9)
PHF3	PHD finger protein 3(PHF3)
PHF2	PHD finger protein 2(PHF2)
EIF4E	eukaryotic translation initiation factor 4E(EIF4E)
ITGA6	integrin subunit alpha 6(ITGA6)
PHF1	PHD finger protein 1(PHF1)
ITGA5	integrin subunit alpha 5(ITGA5)
ULK1	unc-51 like autophagy activating kinase 1(ULK1)
SLAIN2	SLAIN motif family member 2(SLAIN2)
EIF4H	eukaryotic translation initiation factor 4H(EIF4H)
ITGA8	integrin subunit alpha 8(ITGA8)
SALL1	spalt like transcription factor 1(SALL1)
SLAIN1	SLAIN motif family member 1(SLAIN1)
PHF8	PHD finger protein 8(PHF8)
SLC5A3	solute carrier family 5 member 3(SLC5A3)
NPEPL1	aminopeptidase-like 1(NPEPL1)
METAP1	methionyl aminopeptidase 1(METAP1)
HECW2	HECT, C2 and WW domain containing E3 ubiquitin protein ligase 2(HECW2)
FAM175B	family with sequence similarity 175 member B(FAM175B)
PRKAG1	protein kinase AMP-activated non-catalytic subunit gamma 1(PRKAG1)
SORL1	sortilin related receptor 1(SORL1)
ZCWPW2	zinc finger CW-type and PWWP domain containing 2(ZCWPW2)
MRFAP1	Morf4 family associated protein 1(MRFAP1)
CLTC	clathrin heavy chain(CLTC)
PHC3	polyhomeotic homolog 3(PHC3)
KLHL29	kelch like family member 29(KLHL29)
FAM83B	family with sequence similarity 83 member B(FAM83B)
CCDC43	coiled-coil domain containing 43(CCDC43)
KLHL28	kelch like family member 28(KLHL28)
RANBP3	RAN binding protein 3(RANBP3)
DBR1	debranching RNA lariats 1(DBR1)
IRAK2	interleukin 1 receptor associated kinase 2(IRAK2)
VSIG10	V-set and immunoglobulin domain containing 10(VSIG10)
IRAK1	interleukin 1 receptor associated kinase 1(IRAK1)
UBE2A	ubiquitin conjugating enzyme E2 A(UBE2A)
MYCT1	myc target 1(MYCT1)
CHST2	carbohydrate sulfotransferase 2(CHST2)
G3BP2	G3BP stress granule assembly factor 2(G3BP2)
PRKCI	protein kinase C iota(PRKCI)
HEPHL1	hephaestin like 1(HEPHL1)
CCDC47	coiled-coil domain containing 47(CCDC47)
LEF1	lymphoid enhancer binding factor 1(LEF1)
GZF1	GDNF inducible zinc finger protein 1(GZF1)
CHST1	carbohydrate sulfotransferase 1(CHST1)
TMEM67	transmembrane protein 67(TMEM67)
FAM134C	family with sequence similarity 134 member C(FAM134C)
MYT1L	myelin transcription factor 1 like(MYT1L)
UBE2O	ubiquitin conjugating enzyme E2 O(UBE2O)
FAM134A	family with sequence similarity 134 member A(FAM134A)
KLHL18	kelch like family member 18(KLHL18)
BPTF	bromodomain PHD finger transcription factor(BPTF)
CHST7	carbohydrate sulfotransferase 7(CHST7)
TMEM69	transmembrane protein 69(TMEM69)
KLHL15	kelch like family member 15(KLHL15)
KLHL11	kelch like family member 11(KLHL11)
ZADH2	zinc binding alcohol dehydrogenase domain containing 2(ZADH2)
NGFR	nerve growth factor receptor(NGFR)
NKIRAS1	NFKB inhibitor interacting Ras like 1(NKIRAS1)
FAIM2	Fas apoptotic inhibitory molecule 2(FAIM2)
PRKD3	protein kinase D3(PRKD3)
UBE3B	ubiquitin protein ligase E3B(UBE3B)
UBE3A	ubiquitin protein ligase E3A(UBE3A)
TRA2B	transformer 2 beta homolog (Drosophila)(TRA2B)
UTP6	UTP6, small subunit processome component(UTP6)
GPR6	G protein-coupled receptor 6(GPR6)
HCFC2	host cell factor C2(HCFC2)
UBE3C	ubiquitin protein ligase E3C(UBE3C)
PALMD	palmdelphin(PALMD)
HECA	hdc homolog, cell cycle regulator(HECA)
GPRC5A	G protein-coupled receptor class C group 5 member A(GPRC5A)
TMEM159	transmembrane protein 159(TMEM159)
GLS2	glutaminase 2(GLS2)
TNRC6C	trinucleotide repeat containing 6C(TNRC6C)
FAM135A	family with sequence similarity 135 member A(FAM135A)
PIKFYVE	phosphoinositide kinase, FYVE-type zinc finger containing(PIKFYVE)
SLC39A9	solute carrier family 39 member 9(SLC39A9)
TMEM87A	transmembrane protein 87A(TMEM87A)
ZNF609	zinc finger protein 609(ZNF609)
SLC39A6	solute carrier family 39 member 6(SLC39A6)
PHF20L1	PHD finger protein 20-like 1(PHF20L1)
YES1	YES proto-oncogene 1, Src family tyrosine kinase(YES1)
TNRC6A	trinucleotide repeat containing 6A(TNRC6A)
TEX261	testis expressed 261(TEX261)
PIK3R1	phosphoinositide-3-kinase regulatory subunit 1(PIK3R1)
GLRB	glycine receptor beta(GLRB)
UBE4A	ubiquitination factor E4A(UBE4A)
L3MBTL3	l(3)mbt-like 3 (Drosophila)(L3MBTL3)
MAP1A	microtubule associated protein 1A(MAP1A)
MAP1B	microtubule associated protein 1B(MAP1B)
SH3BP5	SH3 domain binding protein 5(SH3BP5)
IRF9	interferon regulatory factor 9(IRF9)
SH3BP4	SH3 domain binding protein 4(SH3BP4)
NBL1	neuroblastoma 1, DAN family BMP antagonist(NBL1)
TMEM47	transmembrane protein 47(TMEM47)
PRLR	prolactin receptor(PRLR)
GSPT1	G1 to S phase transition 1(GSPT1)
PHB2	prohibitin 2(PHB2)
IRF1	interferon regulatory factor 1(IRF1)
KLHL31	kelch like family member 31(KLHL31)
IRF2	interferon regulatory factor 2(IRF2)
IRF4	interferon regulatory factor 4(IRF4)
IGFBP3	insulin like growth factor binding protein 3(IGFBP3)
XRCC4	X-ray repair cross complementing 4(XRCC4)
SLC2A4RG	SLC2A4 regulator(SLC2A4RG)
PPP1R21	protein phosphatase 1 regulatory subunit 21(PPP1R21)
CCDC148	coiled-coil domain containing 148(CCDC148)
CMTR2	cap methyltransferase 2(CMTR2)
PNISR	PNN interacting serine and arginine rich protein(PNISR)
MXI1	MAX interactor 1, dimerization protein(MXI1)
ANKLE2	ankyrin repeat and LEM domain containing 2(ANKLE2)
SSR1	signal sequence receptor subunit 1(SSR1)
MAGED1	MAGE family member D1(MAGED1)
WDR75	WD repeat domain 75(WDR75)
WDR76	WD repeat domain 76(WDR76)
INTS6	integrator complex subunit 6(INTS6)
CLK4	CDC like kinase 4(CLK4)
PHTF2	putative homeodomain transcription factor 2(PHTF2)
FSTL5	follistatin like 5(FSTL5)
TLK1	tousled-like kinase 1(TLK1)
CDCA4	cell division cycle associated 4(CDCA4)
ADAM9	ADAM metallopeptidase domain 9(ADAM9)
ITFG1	integrin alpha FG-GAP repeat containing 1(ITFG1)
WNT10A	Wnt family member 10A(WNT10A)
PPP1R37	protein phosphatase 1 regulatory subunit 37(PPP1R37)
ROCK1	Rho associated coiled-coil containing protein kinase 1(ROCK1)
KIAA1804	mixed lineage kinase 4(KIAA1804)
SKP1	S-phase kinase associated protein 1(SKP1)
PPP1R3A	protein phosphatase 1 regulatory subunit 3A(PPP1R3A)
PDCD1LG2	programmed cell death 1 ligand 2(PDCD1LG2)
ERGIC2	ERGIC and golgi 2(ERGIC2)
ZNF236	zinc finger protein 236(ZNF236)
PITPNM2	phosphatidylinositol transfer protein membrane associated 2(PITPNM2)
EIF2S2	eukaryotic translation initiation factor 2 subunit beta(EIF2S2)
TGIF1	TGFB induced factor homeobox 1(TGIF1)
TGIF2	TGFB induced factor homeobox 2(TGIF2)
ST18	ST18, C2H2C-type zinc finger(ST18)
CD226	CD226 molecule(CD226)
ERBB4	erb-b2 receptor tyrosine kinase 4(ERBB4)
ERBB3	erb-b2 receptor tyrosine kinase 3(ERBB3)
SORCS1	sortilin related VPS10 domain containing receptor 1(SORCS1)
DTD2	D-tyrosyl-tRNA deacylase 2 (putative)(DTD2)
DAAM1	dishevelled associated activator of morphogenesis 1(DAAM1)
HADHA	hydroxyacyl-CoA dehydrogenase/3-ketoacyl-CoA thiolase/enoyl-CoA hydratase (trifunctional protein), alpha subunit(HADHA)
ADCYAP1	adenylate cyclase activating polypeptide 1(ADCYAP1)
DTD1	D-tyrosyl-tRNA deacylase 1(DTD1)
SORCS3	sortilin related VPS10 domain containing receptor 3(SORCS3)
PPP1R3C	protein phosphatase 1 regulatory subunit 3C(PPP1R3C)
PPP1R3B	protein phosphatase 1 regulatory subunit 3B(PPP1R3B)
PPP1R3F	protein phosphatase 1 regulatory subunit 3F(PPP1R3F)
SYBU	syntabulin(SYBU)
SEC23IP	SEC23 interacting protein(SEC23IP)
WDR59	WD repeat domain 59(WDR59)
ZNF622	zinc finger protein 622(ZNF622)
GPD2	glycerol-3-phosphate dehydrogenase 2(GPD2)
TCF7	transcription factor 7 (T-cell specific, HMG-box)(TCF7)
SPTSSB	serine palmitoyltransferase small subunit B(SPTSSB)
SYNE1	spectrin repeat containing nuclear envelope protein 1(SYNE1)
ZNF217	zinc finger protein 217(ZNF217)
KCNJ6	potassium voltage-gated channel subfamily J member 6(KCNJ6)
TLL2	tolloid like 2(TLL2)
TLL1	tolloid like 1(TLL1)
RTN4	reticulon 4(RTN4)
ENOX2	ecto-NOX disulfide-thiol exchanger 2(ENOX2)
SEPHS1	selenophosphate synthetase 1(SEPHS1)
MSR1	macrophage scavenger receptor 1(MSR1)
NAP1L1	nucleosome assembly protein 1 like 1(NAP1L1)
RASSF9	Ras association domain family member 9(RASSF9)
PDIA6	protein disulfide isomerase family A member 6(PDIA6)
PHF20	PHD finger protein 20(PHF20)
RTN1	reticulon 1(RTN1)
STOX2	storkhead box 2(STOX2)
LZIC	leucine zipper and CTNNBIP1 domain containing(LZIC)
MTHFD2	methylenetetrahydrofolate dehydrogenase (NADP+ dependent) 2, methenyltetrahydrofolate cyclohydrolase(MTHFD2)
WDR37	WD repeat domain 37(WDR37)
P4HA2	prolyl 4-hydroxylase subunit alpha 2(P4HA2)
DYNLL2	dynein light chain LC8-type 2(DYNLL2)
GRIPAP1	GRIP1 associated protein 1(GRIPAP1)
CREG1	cellular repressor of E1A stimulated genes 1(CREG1)
SERTAD3	SERTA domain containing 3(SERTAD3)
KIAA1033	KIAA1033 ortholog(KIAA1033)
SPG20	spastic paraplegia 20 (Troyer syndrome)(SPG20)
SERTAD4	SERTA domain containing 4(SERTAD4)
WDR33	WD repeat domain 33(WDR33)
ZDHHC2	zinc finger DHHC-type containing 2(ZDHHC2)
STX6	syntaxin 6(STX6)
ZNF281	zinc finger protein 281(ZNF281)
TTC33	tetratricopeptide repeat domain 33(TTC33)
KIAA1841	KIAA1841 ortholog(KIAA1841)
CLMN	calmin(CLMN)
ZDHHC5	zinc finger DHHC-type containing 5(ZDHHC5)
ZDHHC8	zinc finger DHHC-type containing 8(ZDHHC8)
ZDHHC7	zinc finger DHHC-type containing 7(ZDHHC7)
TTC37	tetratricopeptide repeat domain 37(TTC37)
PDE10A	phosphodiesterase 10A(PDE10A)
PLEKHH1	pleckstrin homology, MyTH4 and FERM domain containing H1(PLEKHH1)
GTF2H2	general transcription factor IIH subunit 2(GTF2H2)
GTF2H1	general transcription factor IIH subunit 1(GTF2H1)
JMY	junction mediating and regulatory protein, p53 cofactor(JMY)
WDR47	WD repeat domain 47(WDR47)
UNC80	unc-80 homolog, NALCN activator(UNC80)
C1QL3	complement C1q like 3(C1QL3)
VOPP1	vesicular, overexpressed in cancer, prosurvival protein 1(VOPP1)
CCDC174	coiled-coil domain containing 174(CCDC174)
WDR44	WD repeat domain 44(WDR44)
SPOPL	speckle type BTB/POZ protein like(SPOPL)
RASD1	ras related dexamethasone induced 1(RASD1)
RASD2	RASD family member 2(RASD2)
MFSD6	major facilitator superfamily domain containing 6(MFSD6)
ZBTB6	zinc finger and BTB domain containing 6(ZBTB6)
ZBTB9	zinc finger and BTB domain containing 9(ZBTB9)
KANSL1L	KAT8 regulatory NSL complex subunit 1 like(KANSL1L)
ZNF35	zinc finger protein 35(ZNF35)
EEA1	early endosome antigen 1(EEA1)
PCSK2	proprotein convertase subtilisin/kexin type 2(PCSK2)
PLEKHG3	pleckstrin homology and RhoGEF domain containing G3(PLEKHG3)
GPHN	gephyrin(GPHN)
DGKB	diacylglycerol kinase beta(DGKB)
PDE1B	phosphodiesterase 1B(PDE1B)
DGKE	diacylglycerol kinase epsilon(DGKE)
PLEKHG5	pleckstrin homology and RhoGEF domain containing G5(PLEKHG5)
SOS2	SOS Ras/Rho guanine nucleotide exchange factor 2(SOS2)
SLCO3A1	solute carrier organic anion transporter family member 3A1(SLCO3A1)
GALNT18	polypeptide N-acetylgalactosaminyltransferase 18(GALNT18)
PCSK6	proprotein convertase subtilisin/kexin type 6(PCSK6)
TRIP10	thyroid hormone receptor interactor 10(TRIP10)
GALNT11	polypeptide N-acetylgalactosaminyltransferase 11(GALNT11)
TRIP11	thyroid hormone receptor interactor 11(TRIP11)
GALNT13	polypeptide N-acetylgalactosaminyltransferase 13(GALNT13)
BUB3	BUB3, mitotic checkpoint protein(BUB3)
RASA1	RAS p21 protein activator 1(RASA1)
HAPLN4	hyaluronan and proteoglycan link protein 4(HAPLN4)
PPP1R11	protein phosphatase 1 regulatory inhibitor subunit 11(PPP1R11)
COL15A1	collagen type XV alpha 1 chain(COL15A1)
ELAVL1	ELAV like RNA binding protein 1(ELAVL1)
ZNF25	zinc finger protein 25(ZNF25)
PDZRN3	PDZ domain containing ring finger 3(PDZRN3)
WWTR1	WW domain containing transcription regulator 1(WWTR1)
ELAVL4	ELAV like RNA binding protein 4(ELAVL4)
KANK4	KN motif and ankyrin repeat domains 4(KANK4)
ZNF22	zinc finger protein 22(ZNF22)
RASSF3	Ras association domain family member 3(RASSF3)
MPHOSPH9	M-phase phosphoprotein 9(MPHOSPH9)
RASSF4	Ras association domain family member 4(RASSF4)
P2RY13	purinergic receptor P2Y, G-protein coupled, 13(P2RY13)
RASSF5	Ras association domain family member 5(RASSF5)
RASSF2	Ras association domain family member 2(RASSF2)
ZBTB4	zinc finger and BTB domain containing 4(ZBTB4)
ZBTB2	zinc finger and BTB domain containing 2(ZBTB2)
CTNS	cystinosin, lysosomal cystine transporter(CTNS)
GFRA2	GDNF family receptor alpha 2(GFRA2)
CMTM6	CKLF like MARVEL transmembrane domain containing 6(CMTM6)
STK33	serine/threonine kinase 33(STK33)
IMPAD1	inositol monophosphatase domain containing 1(IMPAD1)
RNMT	RNA guanine-7 methyltransferase(RNMT)
STK38	serine/threonine kinase 38(STK38)
RBM3	RNA binding motif (RNP1, RRM) protein 3(RBM3)
BTRC	beta-transducin repeat containing E3 ubiquitin protein ligase(BTRC)
STK35	serine/threonine kinase 35(STK35)
TSPAN5	tetraspanin 5(TSPAN5)
RBM6	RNA binding motif protein 6(RBM6)
TSPAN9	tetraspanin 9(TSPAN9)
JAG1	jagged 1(JAG1)
CBFB	core-binding factor beta subunit(CBFB)
RELL1	RELT like 1(RELL1)
RELL2	RELT like 2(RELL2)
SLC7A7	solute carrier family 7 member 7(SLC7A7)
KDM1B	lysine demethylase 1B(KDM1B)
ELOVL1	ELOVL fatty acid elongase 1(ELOVL1)
ST3GAL1	ST3 beta-galactoside alpha-2,3-sialyltransferase 1(ST3GAL1)
SMARCD2	SWI/SNF related, matrix associated, actin dependent regulator of chromatin, subfamily d, member 2(SMARCD2)
ST3GAL5	ST3 beta-galactoside alpha-2,3-sialyltransferase 5(ST3GAL5)
SLC2A4	solute carrier family 2 member 4(SLC2A4)
ELOVL5	ELOVL fatty acid elongase 5(ELOVL5)
ANK2	ankyrin 2(ANK2)
ANK3	ankyrin 3(ANK3)
AAK1	AP2 associated kinase 1(AAK1)
TIMM9	translocase of inner mitochondrial membrane 9(TIMM9)
PDE4B	phosphodiesterase 4B(PDE4B)
ELOVL2	ELOVL fatty acid elongase 2(ELOVL2)
RGN	regucalcin(RGN)
STK39	serine/threonine kinase 39(STK39)
UNC5D	unc-5 netrin receptor D(UNC5D)
PITPNC1	phosphatidylinositol transfer protein, cytoplasmic 1(PITPNC1)
ELOVL6	ELOVL fatty acid elongase 6(ELOVL6)
SAR1B	secretion associated Ras related GTPase 1B(SAR1B)
INSR	insulin receptor(INSR)
SAR1A	secretion associated Ras related GTPase 1A(SAR1A)
RPRD1A	regulation of nuclear pre-mRNA domain containing 1A(RPRD1A)
RET	ret proto-oncogene(RET)
[truncated: 467 more rows]

## Sheet: Sheet1
							#N/A			ZNF513	yes
							#N/A
							#N/A
							#N/A
							#N/A
							#N/A
							#N/A
							#N/A
							#N/A
							#N/A
							#N/A
							#N/A
							#N/A
							#N/A
							#N/A
							#N/A
							#N/A
							#N/A
							#N/A
							#N/A
							#N/A
							#N/A
							#N/A
							#N/A
							#N/A
							#N/A
							#N/A
							#N/A
							#N/A
							#N/A
							#N/A
							#N/A
							#N/A
							#N/A
							#N/A
							#N/A
							#N/A
							#N/A
							#N/A
							#N/A
							#N/A
							#N/A
							#N/A
							#N/A
							#N/A
							#N/A
							#N/A
							#N/A
							#N/A
