# Supplementary material for: Micro RNA Transcriptome Profile in Canine Oral Melanoma
Source: Preprints.org preprint supplement (doi:10.20944/preprints201908.0286.v1), 2019-08-27
Supplement: Supplementary file 3 [file Table S2.docx]

**Table S2.** Differentially expressed microRNAs in canine oral melanoma

| **miR** | **Stand** | **Species** | **FC** 1 | **FDR** 2 | **Chr** 3 |
| --- | --- | --- | --- | --- | --- |
| mir-8884 | Mature 3' | Canis familiaris | 4.034773 | 0.03461 | 8 |
| mir-107 | Mature 3' | Canis familiaris | 4.250258 | 0.021759 | 28 |
| mir-8859b | Mature 3' | Canis familiaris | 4.282903 | 0.027875 | 18 |
| mir-421 | Mature 3' | Canis familiaris | 4.409005 | 0.027802 | X |
| mir-190a | Mature 5' | Canis familiaris | 5.329536 | 0.044529 | 30 |
| mir-454 | Mature 3' | Homo sapiens | 5.685019 | 0.012674 | 9 |
| mir-335 | Mature 5' | Canis familiaris | 5.766532 | 0.017663 | 14 |
| mir-132 | Mature 3' | Homo sapiens | 5.972318 | 0.005934 | 9 |
| mir-301a | Mature 3' | Canis familiaris | 6.881347 | 0.002577 | 9 |
| mir-330 | Mature 5' | Canis familiaris | 7.185367 | 0.002056 | 1 |
| mir-21 | Mature 5' | Homosapiens//Canis familiaris | 7.596891 | 0.000402 | 9 |
| mir-423//mir-423a | Mature 5' | Homosapiens//Canis familiaris | 8.685235 | 0.005805 | 9 |
| mir-363 | Mature 3' | Canis familiaris | 9.615488 | 0.0003 | X |
| mir-146b | Mature 5' | Homosapiens//Canis familiaris | 15.3172 | 0.001624 | 28 |
| mir-140 | Mature 3' | Homo sapiens | 23.03204 | 0.006266 | 5 |
| mir-9-2//mir-9-3//mir-9-1 | Mature 5' | Canis familiaris | 62.71309 | 3.36E-07 | 3,7 |
| mir-223 | Mature 3' | Canis familiaris | 37.48587 | 0.000816 | X |
| mir-383 | Mature 5' | Homosapiens//Canis familiaris | 207.4762 | 0.000243 | 16 |
| mir-450b | Mature 5' | Canis familiaris | 60.13962 | 3.09E-08 | X |
| mir-196a-2 | Mature 5' | Canis familiaris | 990.939 | 2.54E-08 | 27 |
| mir-371 | Mature 5' | Canis familiaris | 22.7467 | 5.67E-05 | 1 |
| mir-542 | Mature 3' | Canis familiaris | 131.0649 | 1.8E-09 | X |
| mir-130b | Mature 3' | Canis familiaris | 14.16813 | 9.51E-05 | 26 |
| mir-424 | Mature 5' | Homo sapiens | 57.01799 | 4.06E-09 | X |
| mir-450a | Mature 5' | Canis familiaris | 24.21047 | 4.06E-05 | X |
| mir-106a | Mature 5' | Homo sapiens | 17.83597 | 1.27E-05 | X |
| mir-301b | Mature 3' | Canis familiaris | 13.50574 | 7.86E-05 | 26 |
| mir-20b | Mature 5' | Canis familiaris | 38.44884 | 3.51E-07 | X |
| mir-18b | Mature 5' | Canis familiaris | 27.73223 | 7E-06 | X |
| mir-424 | Mature 3' | Homosapiens//Canis familiaris | 71.55595 | 8.27E-07 | X |
| let-7a-1//let-7a-3//let-7a-2 | Mature 5' | Homosapiens//Canis familiaris | -3.26912 | 0.015828 | 10,5 |
| mir-126 | Mature 5' | Homosapiens//Canis familiaris | -3.56347 | 0.017478 | 9 |
| mir-125a | Mature 5' | Canis familiaris | -4.56323 | 0.006519 | 1 |
| let-7b | Mature 5' | Canis familiaris | -3.3976 | 0.016636 | 10 |
| mir-101-2//mir-101-1 | Mature 3' | Canis familiaris | -3.17805 | 0.017102 | 1,5 |
| mir-1271 | Mature 5' | Canis familiaris | -4.31608 | 0.017236 | 4 |
| mir-183 | Mature 5' | Homosapiens//Canis familiaris | -3.55011 | 0.022457 | 14 |
| mir-26b | Mature 5' | Homo sapiens | -2.7649 | 0.044183 | 37 |
| mir-29c//mir-29c-1//mir-29c-2 | Mature 3' | Homosapiens//Canis familiaris | -4.2025 | 0.003675 | 7 |
| mir-152 | Mature 3' | Homosapiens//Canis familiaris | -3.24388 | 0.031581 | 9 |
| mir-1260a | Mature 5' | Homo sapiens | -3.43193 | 0.027155 | 4 |
| mir-378i | Mature 5' | Homo sapiens | -3.11469 | 0.032747 | 3 |
| mir-708 | Mature 5' | Homosapiens//Canis familiaris | -3.86659 | 0.032151 | 21 |
| mir-31 | Mature 5' | Canis familiaris | -3.54636 | 0.04315 | 11 |
| mir-143 | Mature 5' | Homo sapiens | -3.78564 | 0.03461 | 4 |
| mir-1468 | Mature 5' | Canis familiaris | -5.32076 | 0.002688 | X |
| mir-145 | Mature 3' | Homo sapiens | -5.5447 | 0.000697 | 4 |
| let-7c | Mature 5' | Homosapiens//Canis familiaris | -5.90597 | 0.000288 | 31 |
| mir-379 | Mature 5' | Homosapiens//Canis familiaris | -5.97347 | 0.018861 | 8 |
| mir-147 | Mature 3' | Canis familiaris | -7.03391 | 0.001624 | 30 |
| mir-96 | Mature 5' | Canis familiaris | -8.99517 | 7.86E-05 | 14 |
| mir-99a-1//mir-99a-2 | Mature 5' | Canis familiaris | -12.0655 | 0.00049 | 31,5 |
| mir-452 | Mature 5' | Canis familiaris | -16.7494 | 9.86E-05 | X |
| mir-409 | Mature 5' | Homo sapiens | -16.8478 | 2.12E-07 | 8 |
| mir-95 | Mature 3' | Canis familiaris | -17.611 | 0.000112 | 3 |
| mir-224 | Mature 5' | Canis familiaris | -28.174 | 1.14E-07 | X |
| mir-375 | Mature 3' | Canis familiaris | -38.6428 | 6.83E-14 | 37 |
| mir-141 | Mature 3' | Homo sapiens | -153.251 | 0 | 27 |
| mir-429 | Mature 3' | Canis familiaris | -314.722 | 2.88E-22 | 5 |
| mir-205 | Mature 5' | Canis familiaris | -320.15 | 0 | 7 |
| mir-200c | Mature 3' | Homosapiens//Canis familiaris | -376.314 | 2.93E-22 | 27 |
| mir-200a | Mature 3' | Homo sapiens | -520.662 | 1.41E-27 | 5 |
| mir-200b | Mature 3' | Homo sapiens | -663.457 | 0 | 5 |
| mir-203a//mir-203 | Mature 3' | Homosapiens//Canis familiaris | -854.249 | 0 | 8 |

1 Fold change. 2 False discovery rate.  3 Chromosome
