# Supplementary material for: Micro RNA Transcriptome Profile in Canine Oral Melanoma
Source: Preprints.org preprint supplement (doi:10.20944/preprints201908.0286.v1), 2019-08-27
Supplement: Supplementary file 5 [file Table S4.xlsx]

## Sheet: Table S4a
Table S4a. Differentially expressed genes from GSE31909
Gene.symbol	adj.P.Val	logFC
TNC	5.95e-09	5.11009
ID3	1.96e-12	4.87759
VGF	2.81e-07	4.70266
IL1B	0.0114	4.46067
CXCL8	0.00477	4.22612
PRAME	1.33e-05	4.07382
TM4SF1	8.8e-07	4.05312
CCL20	0.0122	4.04454
ID1	1.37e-07	3.66951
SPP1	1.69e-06	3.61201
TMEM158	5.55e-10	3.33034
MAGEA6	1.07e-06	3.32745
CTHRC1	0.0193	3.28892
FOXD1	2.35e-05	3.27797
ADAM19	4.72e-10	3.19977
CTGF	3.79e-05	3.19566
HAS2	1.94e-07	3.18609
ISG20	0.000346	3.15685
SERPINB2	0.0262	3.08893
PSG3	0.00116	3.06139
MAGEA12	2.77e-07	3.00885
FMN2	0.00789	2.98032
DNER	0.00321	2.93332
NNMT	2.18e-05	2.70086
ZIC2	0.0028	2.61368
STEAP1	9.97e-07	2.56375
IER3	0.00568	2.48537
ERRFI1	0.00167	2.43855
IGFBP3	3.02e-08	2.42356
CPVL	3.94e-08	2.42072
TWIST1	8.85e-06	2.39649
PLAUR	0.00316	2.37254
C2CD2	0.00351	2.33282
FMNL2	7.53e-07	2.32101
CD70	0.014	2.31863
MEIS2	0.000388	2.30109
TNS1	0.00419	2.28597
SLC20A1	0.00092	2.23288
PEG10	8.11e-06	2.20707
HENMT1	0.00033	2.17857
ADM	1.13e-05	2.16808
SMAGP	0.00108	2.1623
GPC6	2.93e-06	2.15963
SOD2	2.32e-10	2.14916
NRIP3	9.16e-05	2.14572
ALDOA	0.000633	2.13811
LOC645166	6.81e-09	2.13171
DPYSL3	9.47e-08	2.12122
TNFRSF21	9.29e-05	2.09984
TDO2	1.28e-05	2.08948
AIM2	4.25e-05	2.08771
ANGPT1	2.88e-06	2.08649
MAGEA3	1.75e-07	2.08392
C19orf48	0.00312	2.03484
LIN28B	0.00836	2.03224
HOXA5	0.0001	2.02537
PTPRR	0.000405	2.01803
CCT7	0.00133	1.9981
PLAT	2.96e-07	1.96847
CCDC58	9.48e-06	1.94775
ODC1	0.00311	1.92927
PCOLCE2	0.00019	1.91305
RPLP0	4.77e-05	1.90258
SUGCT	0.00899	1.90147
SIX4	0.000532	1.89234
SLC38A1	2.62e-08	1.88906
SATB2	0.00612	1.8821
RPL6	0.03	1.87366
DLX1	0.00072	1.86609
DLL3	0.0236	1.86542
SPHK1	0.00439	1.8589
PSG9	2.88e-06	1.84089
CSAG3	1.89e-07	1.83674
IFI44	4.74e-06	1.83222
LARP6	7.21e-06	1.8296
ATP1B1	0.000966	1.8273
SLC2A1	4.5e-06	1.8194
HOXB2	0.000148	1.81624
PPP2R2B	0.00608	1.79744
ASNS	0.00265	1.79018
HEG1	0.00131	1.78287
EYA4	0.0384	1.77966
TFRC	0.00973	1.77573
UGCG	1.94e-07	1.77422
FSD1	0.00323	1.77387
NPC1	0.00167	1.75498
CTSC	0.00772	1.75134
PSMC4	2.17e-10	1.75097
MAPKAP1	0.0249	1.73729
FHL2	0.0136	1.73241
STAT1	0.000386	1.70808
BMP2	1.75e-07	1.69106
TP53TG3	0.0113	1.67071
LIMS1	0.0284	1.66263
GOSR2	0.0271	1.65212
WWC1	0.00033	1.64707
CLDN14	0.00114	1.64392
GADD45A	0.0187	1.63988
NAMPT	0.0017	1.63825
MCTP1	0.00399	1.63754
GBP2	0.000147	1.63223
PTPRG	0.000812	1.62507
RPS15	0.0303	1.62361
RALY	0.0204	1.62201
SLC5A6	9.96e-05	1.60728
FOXP1-IT1	6.23e-06	1.60557
SPDL1	1.39e-05	1.6047
PAPSS2	1.68e-05	1.60263
GAD1	0.0054	1.59961
RPS7	0.0138	1.59633
PLPP2	9.94e-07	1.56507
NREP	0.00255	1.56055
FAM60A	0.00832	1.55871
RRAS2	1.07e-05	1.55568
AKR1A1	0.000558	1.54563
CEBPB	0.00136	1.54026
CDC42EP4	9.71e-05	1.53865
MMP16	0.019	1.53548
C3orf14	0.0264	1.53051
HEY2	0.0448	1.52366
CLDN12	0.00988	1.50951
MTHFD2	2.66e-06	1.50651
PKM	0.000163	1.50556
CSRNP1	1.05e-05	1.50502
SH3KBP1	0.00265	1.50501
THUMPD2	4.41e-08	1.49956
CAP2	0.00131	1.49348
PARP8	0.000625	1.48518
ETV4	2.41e-06	1.47817
TNNT1	3.01e-05	1.4757
TRIB1	0.0079	1.47543
EEF1A2	0.00133	1.47376
TMEM167A	0.0348	1.4728
PROCR	0.0374	1.47275
AKAP12	0.0318	1.46083
ASPHD1	0.000186	1.4603
FNDC3B	1.16e-05	1.45494
PYCR1	0.0033	1.45424
DFFA	0.000165	1.45244
SNORD96A	9.66e-06	1.44937
SLC1A5	8.26e-06	1.44436
CSE1L	0.0423	1.4395
CENPV	1.43e-05	1.43697
P3H2	5.57e-09	1.41256
POLE4	0.04	1.41156
PLCB1	0.00347	1.40752
GAPDH	0.000151	1.40553
EPHA4	0.000301	1.40109
PRR7	0.000567	1.39752
SNX5	0.000292	1.39584
LCP1	9.13e-07	1.39511
POLR1E	0.0209	1.3951
UAP1	0.00613	1.39477
DPH3	5.96e-06	1.39119
GSK3B	0.00173	1.38574
LIF	0.000299	1.38458
ARMCX2	0.0023	1.37371
GXYLT1	0.00741	1.36674
EXT1	1.51e-05	1.36446
AURKA	0.00349	1.36287
NXT1	0.0018	1.3592
PSMD12	0.00301	1.35522
TMEM38B	0.0062	1.35018
PCLO	0.0222	1.34963
SLC9A7	1.15e-05	1.34716
AGBL5	0.00326	1.3458
RPS21	0.000445	1.34369
BOLA2	0.0284	1.33863
RSRC1	0.00625	1.33193
SERF1B	9.47e-08	1.33165
SERPINB8	2.35e-05	1.3315
TMEM5	5.85e-05	1.33006
SNORD17	4.75e-05	1.32928
NCEH1	0.00192	1.3291
NME1	0.00321	1.32826
ANTXR1	9.54e-05	1.32359
KIAA0101	0.000698	1.32288
ISOC1	0.00905	1.321
ERP29	0.0295	1.3209
RNA18S5	0.00864	1.32023
SPRED2	6.31e-05	1.31818
PLOD2	1.53e-07	1.31576
MED8	6.77e-05	1.31443
POU4F1	0.000688	1.31165
SMCO4	0.0106	1.30632
SH3BP4	0.000843	1.3018
GET4	0.000382	1.30112
ANAPC1	6.24e-05	1.29858
FAM86B1	2.81e-05	1.28864
TMEM185B	0.0322	1.27883
PDCD2	0.0442	1.27873
CDK6	2.11e-05	1.2718
DEDD2	3.12e-05	1.2677
TFG	0.00159	1.26675
PELO	0.013	1.2645
NOSIP	1.92e-05	1.26353
HEATR1	0.0194	1.26316
MOK	0.0193	1.26231
BMI1	8.81e-06	1.25579
CADPS	6.53e-05	1.25526
PDCD2L	0.000788	1.2542
FBXO22	6.83e-05	1.24024
HSPA4	0.0031	1.23771
TFB1M	1.29e-05	1.23709
ZNF280C	0.00141	1.23461
TMEM237	2.04e-06	1.23297
PVR	1.47e-05	1.23162
ZRANB2	0.00025	1.23146
SCAND1	6.4e-06	1.23088
KDM1A	0.0364	1.2292
RPL36	0.0376	1.22485
PRMT1	0.00265	1.22314
SNU13	0.00812	1.22257
POLR2D	0.00595	1.22093
BCL2L12	5.12e-08	1.2185
ULBP2	7.22e-06	1.21163
BOP1	0.011	1.20786
PTGS2	0.0124	1.20516
PLIN2	5.44e-07	1.20415
SCHIP1	0.00158	1.202
TLCD1	0.0109	1.20113
PITPNC1	0.00127	1.19251
SOWAHC	0.0116	1.19247
LPAR3	0.000569	1.19221
DENND1A	0.00345	1.18971
MPZL1	2.81e-06	1.18889
HMGA2	0.000113	1.18824
SEC23B	5.35e-05	1.18471
NABP1	0.0152	1.1815
NOP58	1.63e-06	1.17969
SWI5	0.00664	1.17958
MB21D2	8.52e-05	1.17815
PRELID3B	1.13e-06	1.16841
MRPS9	0.0242	1.16502
CTNNBL1	0.00361	1.1646
GMPS	4.77e-06	1.16429
MCM8	8.13e-06	1.16407
WDR46	0.00114	1.16307
TGM2	0.000205	1.16265
HIST1H2BK	0.047	1.16174
DGKD	3.07e-06	1.15556
PPP4R4	0.000722	1.15427
IGF1R	1.24e-06	1.15362
MRPS30	4.68e-05	1.15167
CACHD1	0.000143	1.15156
THOC3	0.0417	1.14985
MPP6	9.4e-05	1.14923
CDCA7	0.018	1.1482
FGFRL1	2.69e-05	1.14585
ARHGAP39	1.6e-06	1.14537
ATP5G1	4.71e-06	1.14477
ATP6AP1L	8.09e-06	1.14357
AEN	0.0003	1.14195
LAS1L	0.00718	1.14112
MRPL45	3.48e-05	1.14039
CDC20	0.00652	1.13958
PLS1	0.000498	1.13547
BTBD10	0.0164	1.13009
NHP2	0.000447	1.13008
PSMD2	6.87e-08	1.12954
NUP37	0.00335	1.12764
SH2B3	3.09e-06	1.12692
IGF2BP3	3.36e-05	1.12613
WDR4	4.66e-05	1.12509
DOCK10	0.00361	1.12343
EIF4EBP1	0.0453	1.1211
SNRPA1	0.000497	1.11999
CSTF2	0.00121	1.11958
EXOSC3	0.00692	1.11833
ORC2	1.13e-05	1.11816
BHLHE40	5.99e-06	1.11774
LOC728554	5.73e-05	1.11758
AATF	1.19e-05	1.11584
GATC	0.00981	1.11487
APP	0.0402	1.11413
PARP12	0.00711	1.11377
SERPINB1	0.0214	1.11
GPN3	0.00601	1.10682
MRPL30	8.61e-05	1.10612
CSTB	0.00499	1.10492
C20orf24	0.000147	1.10186
NOL11	0.0044	1.0981
NRP2	0.00133	1.09756
TRIM5	1.2e-06	1.09593
UQCC1	0.00611	1.09548
TPRKB	0.000572	1.09537
SNRPB	9.4e-05	1.09525
FAM86HP	2.23e-05	1.09387
BRI3BP	0.00448	1.08911
THOC5	0.00017	1.08251
RFC4	0.00279	1.08115
DSN1	0.0108	1.08103
PHF5A	6.17e-05	1.07978
EIF4A3	0.00116	1.07905
PMAIP1	1.13e-05	1.07436
FZD7	0.000322	1.07045
TJP2	2.99e-06	1.06691
U2SURP	0.00123	1.06473
HMGN5	0.00156	1.06408
RPA3	0.00156	1.05611
RPP25L	3.03e-06	1.0558
TFAM	0.0126	1.05547
FAM206A	1.45e-05	1.05432
TCEB3	1.7e-05	1.05243
SLC4A4	2.81e-05	1.05203
SLC39A3	2.21e-05	1.04958
RAE1	6.71e-06	1.0491
RCC1	3.7e-05	1.04905
RECQL4	0.000265	1.04636
PSMB3	0.000586	1.04618
MBOAT7	5.3e-05	1.04597
CNOT9	0.000251	1.04365
SNRNP40	1.32e-05	1.04185
IDS	0.00267	1.03865
IMP4	0.0281	1.03794
C3orf52	0.000102	1.03719
SLCO5A1	0.0063	1.03471
C2orf49	0.000287	1.03304
CHAF1B	1.7e-05	1.03302
MRPL37	2.02e-06	1.03047
CDK12	6.17e-05	1.03029
LSP1	1.35e-05	1.02886
TRIT1	0.0155	1.02594
CKAP2L	4.28e-05	1.02544
EIF3B	0.00328	1.02062
VMP1	0.0206	1.02019
LCLAT1	0.000196	1.01924
SNRPF	0.00011	1.01909
SEZ6L2	0.00135	1.01707
NOP16	2.37e-05	1.01592
DHRS11	7.82e-05	1.01375
KHSRP	1.17e-05	1.01341
AHSA2	0.000219	1.01315
DYRK3	0.000216	1.01219
MTX2	1e-05	1.01217
LBX2	0.0369	1.01017
SRGAP1	6.76e-06	1.01011
HDGF	0.00177	1.01
CDC45	0.0259	1.00393
WDR12	0.00629	1.00327
YARS	9.47e-08	1.0016
TAF10	3.8e-05	1.00109
PXN	1.62e-06	1.00079
MRRF	0.00503	0.997728
PDIA4	0.00655	0.99707
DPM1	0.00164	0.994849
GART	0.000791	0.994769
CRLS1	0.0117	0.994694
PGS1	0.000169	0.993305
STAU1	0.0295	0.992395
NELFE	0.000545	0.992312
LYAR	0.00555	0.986266
GABPB1	0.0236	0.98611
GLRX3	9.97e-05	0.985991
MRPS12	8.76e-06	0.983631
MRPS17	3.28e-06	0.981143
FAF1	0.000598	0.979265
UTP14A	3.51e-05	0.978909
MRPL46	0.00567	0.977504
EIF4G1	7.53e-07	0.977131
PUS7	0.00827	0.976982
PEMT	0.000253	0.976741
TRIM9	1.41e-05	0.976686
EIF4E2	5.1e-06	0.970877
SEC22B	2.24e-05	0.968771
STOML2	0.034	0.968385
SLAMF7	2.04e-05	0.967982
TRMT2B	0.000256	0.967944
FAM50B	0.000219	0.966983
ADAMTS9	0.00023	0.966669
SAAL1	0.0218	0.966456
FAM43A	0.000537	0.965169
COX7A2L	0.00671	0.959553
NOP56	0.00282	0.959385
IFNAR2	4.79e-05	0.959287
UGP2	0.00609	0.958773
JMJD6	7.15e-06	0.957041
RAD54L	0.0389	0.955193
FKBP11	0.00131	0.955109
UCK2	0.000184	0.954667
AKIP1	0.00162	0.954465
RPL29	0.000202	0.953349
MYO19	0.0207	0.95194
KMT5B	0.0281	0.951566
CTPS1	1.96e-05	0.951541
POLD1	0.0216	0.951243
ZC3H15	0.000688	0.950416
MTX1	0.011	0.95013
SKAP2	0.0258	0.94845
ZCCHC7	0.00028	0.948074
FANCL	3.19e-05	0.948006
DDIAS	0.00023	0.947377
ALKBH2	0.00442	0.946907
MCM4	0.00163	0.945813
OGFOD3	0.000134	0.945445
CAD	1.5e-05	0.94509
QSOX2	1.98e-05	0.94469
EXOSC4	3.45e-05	0.9444
WDR75	0.039	0.943536
XRN2	0.00166	0.94296
CDKN2B	1.93e-05	0.940494
RPL26L1	1.12e-06	0.940399
SLC39A14	0.0434	0.939636
IGF2BP2	0.00104	0.93884
METTL5	0.00014	0.938839
ELP5	0.00514	0.938013
RNF144A	0.000167	0.937621
TTC32	0.00117	0.937442
PRKDC	0.00514	0.936411
BCCIP	0.0308	0.935551
MRPS16	2.15e-05	0.935084
PFDN6	1.87e-05	0.934103
PAXBP1	5.54e-05	0.933503
RFC5	0.000418	0.933281
HP1BP3	2.09e-05	0.931533
OXLD1	9.93e-06	0.927538
PDIA5	0.0017	0.927037
LSAMP	0.000186	0.925325
MRPL2	0.000752	0.925133
RARS	0.000572	0.924516
CHTF18	0.016	0.923837
GPN1	0.026	0.92215
EIF6	0.000724	0.92215
HOXB6	0.00386	0.920684
ATG7	0.00125	0.920172
DUSP11	0.00137	0.920157
MRPL50	5.35e-05	0.918929
ZMYM1	0.000144	0.91882
NCBP2	0.000397	0.917633
BRIX1	0.000157	0.916862
CCT4	0.00575	0.91593
UBFD1	3.37e-06	0.914923
BYSL	0.0149	0.914763
AGTRAP	0.0075	0.914461
RRBP1	0.0376	0.912364
MSH6	0.00243	0.911944
SEC14L1	4.04e-05	0.911638
CD82	0.0116	0.910673
MRPL12	0.000585	0.910254
JADE3	0.00287	0.909766
MRPL3	0.0389	0.906841
BLCAP	9.97e-05	0.90651
MTFR1	9.16e-05	0.905644
ITPR1	1.67e-05	0.904412
ONECUT2	0.00888	0.904371
SPTY2D1	1.6e-06	0.904346
C2orf47	9.83e-05	0.902286
TTLL4	0.000247	0.901995
RAB27B	0.0269	0.901785
HPRT1	0.000139	0.901761
CLEC2D	0.00045	0.90138
UBL7	0.00262	0.901199
SF3A2	0.0208	0.898841
C14orf159	0.000113	0.898516
SRP19	0.00928	0.898375
HJURP	0.000248	0.898151
E2F7	0.000922	0.89701
NDC1	1.87e-06	0.895701
XRCC6	0.000409	0.894921
PRMT3	0.0346	0.893866
NUDC	0.0231	0.891742
USP1	0.0321	0.891186
STK17B	0.000214	0.890566
ECE2	1.75e-07	0.890366
EBNA1BP2	0.000322	0.889923
DDX27	0.0001	0.887403
PRPF4	0.000582	0.887203
FANCG	4.92e-05	0.886866
MED27	1.08e-05	0.886765
LRRC42	0.0139	0.885724
MRGBP	0.00345	0.884885
RYK	0.0112	0.884248
PPIC	2.35e-05	0.88385
ATG4B	0.0316	0.883541
NMD3	0.021	0.882616
RUVBL1	0.00131	0.882192
NUP93	0.00172	0.882053
MPHOSPH10	0.0303	0.880976
PSMB2	0.000185	0.880611
C12orf45	0.000409	0.880196
CDK7	0.00773	0.879676
ABHD8	0.026	0.879436
MRPL14	0.000359	0.878335
TIMM21	0.00023	0.878309
IQCB1	2.78e-06	0.877493
ATIC	0.0326	0.876902
EIF3D	0.0223	0.876743
PIPSL	0.00648	0.876145
SP4	8.81e-05	0.876025
EFCAB11	0.00115	0.875044
PCGF1	0.00235	0.874987
EXOSC5	0.0299	0.87415
RFWD3	1.08e-05	0.873956
TRIM39	6.69e-06	0.873928
FAM81A	0.00121	0.873397
FAM72B	0.022	0.873174
SF3B6	0.00621	0.872673
COPS3	1.87e-06	0.871542
COG5	0.0374	0.871519
CRIPT	0.043	0.871448
RCL1	0.00021	0.87053
AEBP2	0.00303	0.869764
NUDT1	0.0268	0.869114
VPS33A	1.28e-05	0.868385
PPM1G	0.0043	0.867932
TRIP12	2.38e-05	0.865397
WDR54	0.000734	0.864699
SHQ1	0.00135	0.863787
RRM1	4.4e-05	0.863613
RANGAP1	8.11e-06	0.861549
TOMM22	0.000708	0.860907
PLPP5	5.09e-05	0.860559
SLX1A	0.00105	0.860095
TUBB	0.0181	0.859799
BLM	0.000233	0.858932
HBEGF	5.56e-06	0.858125
KCNQ3	0.00868	0.857917
IL4I1	0.000561	0.857454
DSCC1	0.00316	0.856324
ZDHHC23	3.16e-06	0.856252
POLRMT	1.06e-05	0.855978
CCDC93	1.65e-05	0.855218
RAB23	0.0084	0.854897
CCNH	0.000209	0.854256
AMZ2	0.000507	0.854021
CCNYL1	0.000166	0.853901
TRIM28	0.0299	0.853737
CDCA8	0.00017	0.853022
RCN1	0.000641	0.85302
TIMM8A	0.000621	0.852254
CD83	0.000256	0.852136
PAFAH1B3	0.000667	0.851566
RBM18	0.000681	0.851407
NDUFB9	0.0137	0.850716
DTNA	0.0221	0.850553
LDHA	0.00105	0.850229
C21orf59	4.09e-05	0.84948
MMADHC	2.06e-05	0.849331
TMEM214	0.00367	0.849169
SPC25	1.27e-06	0.848731
NRAS	0.0003	0.848367
BZW2	0.0222	0.848166
PDE6D	0.00595	0.84806
SMU1	4.02e-05	0.847541
UTP6	0.000625	0.846355
RPP40	0.000472	0.845223
CETN3	0.00558	0.844799
CCZ1B	0.000247	0.844186
CYC1	0.036	0.843995
PDRG1	0.000276	0.8437
XRCC1	0.00641	0.841825
NUP155	0.0344	0.84126
CHRNA5	0.0243	0.840973
EEF2KMT	0.000377	0.840667
MRPS34	0.00198	0.838338
RTN4IP1	2.95e-06	0.837864
DHX36	0.0182	0.837422
OIP5	0.0108	0.835172
RRP8	0.000235	0.835082
NSA2	0.0229	0.834239
MSI2	0.0211	0.832286
METTL22	0.00878	0.831752
IMPAD1	0.000137	0.830499
MFSD1	0.000109	0.829477
CMAS	0.000854	0.829356
PSMA1	0.00778	0.828945
ARMC10	0.000223	0.828834
GTPBP4	0.000827	0.827743
C10orf35	5.35e-05	0.826992
MRPL9	0.00124	0.826321
SNORD12C	0.000118	0.825724
PAGR1	0.00499	0.825634
MRPL13	0.000153	0.824173
ADSL	0.00113	0.823495
YBEY	0.0145	0.823286
COPS7B	0.000147	0.823179
NIF3L1	4.13e-06	0.821954
SLC30A5	0.0153	0.820559
TMUB1	0.0448	0.820544
SUCLG1	0.00169	0.820527
ITGA6	0.00791	0.820467
C18orf21	0.0459	0.820261
ABCC4	0.000383	0.820194
NAB1	0.0218	0.819202
SLC35F2	0.000636	0.817249
MAFG-AS1	0.00477	0.816986
CSNK1D	6.43e-05	0.815934
NR2C2	0.00243	0.81581
NOP2	0.000168	0.81462
GRB2	0.00193	0.814351
CENPK	2.03e-05	0.813943
PA2G4	0.0321	0.813684
DCP2	0.0162	0.81366
EML4	0.000207	0.813588
HAT1	0.000735	0.812963
GMPPA	0.000607	0.812566
SERP1	0.00686	0.811521
CDC25C	0.00468	0.811317
TMEM145	0.0174	0.811236
YDJC	9.3e-06	0.811103
HERC5	0.00405	0.809426
NUCB2	0.00391	0.809301
TEX10	0.0466	0.808106
DKC1	0.00382	0.808099
NOTCH2	0.00487	0.807217
SH2D5	0.044	0.806294
ZNF696	0.0212	0.80563
MRPL33	1.05e-05	0.805467
CENPO	0.00234	0.805048
AP2M1	0.00522	0.804526
TOMM5	0.00139	0.804236
AGPS	0.0349	0.803872
ZSCAN5A	0.000193	0.8038
PIP4K2B	0.0258	0.803578
PSMG4	0.00444	0.801858
CCDC124	5.9e-05	0.801787
SOBP	1.58e-06	0.800691
NPM3	0.000462	0.800242
MTIF2	0.00114	0.799279
TTC27	0.00794	0.798618
RPL39L	1.37e-05	0.798279
FAM207A	0.000338	0.797813
TRIP10	0.0143	0.797596
ARFGAP1	1.58e-06	0.797226
MIR1228	0.000407	0.796403
NUDT5	0.000102	0.79628
GSS	0.0169	0.795729
TTK	0.0419	0.795711
FGF13	0.0134	0.795674
FBXL20	0.00042	0.794844
FAM83D	7.14e-06	0.794575
CLTA	5.85e-05	0.794432
LRWD1	0.0137	0.793907
TMEM209	4.95e-05	0.793591
CSNK2A1	9.89e-06	0.792445
AHCY	0.00118	0.792165
DNAAF3	6.03e-05	0.791828
CRY1	0.0062	0.791653
EGLN1	0.000349	0.791245
MB21D1	0.00305	0.790935
MGME1	0.000131	0.790359
BUB1	0.00134	0.789112
WDFY2	0.00204	0.789016
GPX8	0.000548	0.788977
LINC01278	0.00601	0.788677
CCDC77	0.000457	0.787656
SH3BGRL3	2.39e-05	0.787535
SIRT5	0.00167	0.787525
WDR77	0.0015	0.787051
TBX18	0.00644	0.786089
SLC25A26	0.00711	0.785953
AURKB	0.00104	0.784507
POLR3G	0.000176	0.78436
CEP78	0.000553	0.784249
METTL26	0.00027	0.783422
MBNL1	0.000411	0.782878
C19orf54	0.0435	0.78274
IER5L	0.00113	0.782688
FASTKD2	6.07e-05	0.782208
FBL	5.48e-05	0.782137
DGKI	0.000102	0.781948
RFXANK	0.0109	0.781878
PGM3	0.003	0.780679
TBC1D4	0.000322	0.780615
PNO1	0.00476	0.780543
TRMT1	0.0191	0.779745
CKS1B	0.000219	0.779182
RANBP3	0.0323	0.778589
SMTN	6.61e-05	0.778334
GTF3C3	0.00491	0.778269
POLE3	0.0184	0.778192
DPH2	7.31e-06	0.776346
PPIH	0.00204	0.775866
PXMP4	0.0234	0.775673
CRSP8P	0.0225	0.77519
HAUS7	0.000357	0.774489
SNRNP70	0.00258	0.774418
TNFSF9	0.0212	0.773874
WRNIP1	0.000328	0.77276
C21orf33	4.4e-05	0.771938
RNF25	0.0058	0.771661
GOLT1B	0.00452	0.771591
WNT10B	0.000755	0.771044
RILPL2	1.94e-05	0.771042
PRKAR1B	2.23e-05	0.770204
NELFCD	0.00648	0.769333
CCNC	6.24e-05	0.769085
RPN2	0.0211	0.768765
HOXD13	0.000565	0.768658
C20orf27	1.13e-05	0.767672
FAM86C1	0.00777	0.767671
B9D1	0.00953	0.76741
UPP1	4.25e-06	0.767064
GEM	0.000795	0.766889
ATAD2	0.0288	0.766836
ODF2L	0.018	0.765349
RITA1	0.0287	0.765214
HIST1H4C	0.00188	0.764611
MCFD2	0.0204	0.763999
IPO11	0.0353	0.763387
KBTBD8	0.038	0.763149
PFN2	0.000125	0.762504
RHBDD1	0.000155	0.762368
E2F3	0.00491	0.762242
RIMS2	0.0246	0.76213
PES1	9.29e-06	0.761435
RPP21	0.0199	0.761362
KCTD5	0.0187	0.760806
MKKS	0.00102	0.760541
MKRN3	0.000187	0.760404
POLR2H	0.0004	0.76018
RPL34	0.00258	0.760015
ALG10B	0.0165	0.759997
STRBP	0.0296	0.759609
SP110	0.00096	0.759441
FLJ41455	0.00555	0.75929
LSM5	0.00442	0.759124
EIF2A	0.0447	0.75911
TIMP1	0.000257	0.758928
CHST10	0.0206	0.758451
CYP4B1	0.0235	0.757366
DCUN1D3	0.00453	0.756902
UNCX	0.000615	0.756798
C16orf59	0.0049	0.756287
NOCT	9.3e-05	0.75587
TUBG1	0.0141	0.755661
SNORA61	0.000925	0.755193
ARHGEF39	0.0366	0.75391
KNOP1	0.0247	0.753089
PNN	0.018	0.75277
ETS2	0.0192	0.752566
THOP1	0.0125	0.752554
RPL9	3.74e-05	0.752196
PSMG1	6.75e-05	0.75218
PRMT6	0.000238	0.750958
DDX17	9.43e-06	0.750915
MRPS35	0.00984	0.750421
MOV10	0.0279	0.749618
AAMP	0.00296	0.746953
PFKFB3	0.000469	0.746815
CDC25A	0.00892	0.746441
LIME1	0.0423	0.746288
ACTR5	0.00426	0.746151
RBMS1	0.000897	0.74517
FGGY	4.73e-05	0.744396
EXO1	0.0174	0.743925
NDUFAF7	5.48e-05	0.74225
DPH5	0.0362	0.741737
GEMIN6	0.00256	0.74143
PITX2	0.000544	0.740286
POLR3F	0.0143	0.739388
PTPRE	0.00527	0.738964
ROMO1	0.000493	0.738889
SKIL	0.00804	0.738145
SKIV2L2	1.06e-05	0.73803
MYB	0.0147	0.737934
SLC2A4RG	0.0416	0.737831
RAPGEF5	0.00478	0.737627
NR2F2	0.000208	0.737605
IQCK	0.00449	0.737463
SMG5	9.69e-05	0.737296
TRIP13	0.000299	0.73664
RPL30	0.000111	0.735832
TSEN34	0.00561	0.735808
PSME4	0.0257	0.735532
PSMD14	0.00916	0.733784
HCST	0.000643	0.733619
RSL1D1	0.00141	0.733542
ZNRD1	6.7e-05	0.733161
MT2A	0.00684	0.732496
CSAG1	0.000851	0.732168
TTC4	3.01e-05	0.732125
MGC57346	0.0121	0.729657
ACTN1	0.000354	0.729462
PCNX1	0.00894	0.729111
TTI1	0.0168	0.728735
PMM2	0.00752	0.728486
MEA1	4.47e-05	0.728397
GLTP	0.00365	0.728082
ZNF280D	8.92e-05	0.727985
COPB1	0.00026	0.727921
NBPF14	0.00228	0.727078
GTF2F1	0.00193	0.726751
RSC1A1	0.0405	0.726705
ATG3	0.000151	0.726578
C19orf24	0.000424	0.726132
DDX11	2.5e-05	0.725645
SPATS2L	0.00131	0.725384
PDCL3	0.000246	0.724442
BCAR3	0.000788	0.723993
RBMX	0.000943	0.723851
ZNF593	0.00505	0.723839
TPI1P2	0.0009	0.723734
THOC7	9.33e-05	0.723223
SF3A3	4.95e-05	0.721981
QTRT2	0.000143	0.721754
KIAA1524	0.000155	0.721422
TWISTNB	0.000827	0.720724
KIAA1217	0.000209	0.720116
HSF2BP	0.035	0.719389
RNPS1	0.000456	0.71863
IQCG	0.012	0.718337
FAAP24	0.000535	0.717501
MIR99AHG	2.14e-05	0.717412
PSMA5	5.3e-05	0.717141
SRXN1	0.0244	0.717052
SRSF10	0.000177	0.715907
TMEM39B	0.0046	0.715763
TARS	0.0359	0.71468
RIOK2	0.00385	0.714127
GSPT1	6.57e-06	0.71374
HTRA2	0.0018	0.7133
CLINT1	0.00337	0.713257
GEMIN5	0.00199	0.712352
C8orf76	0.00812	0.712205
PDE4DIP	0.00621	0.711863
MRPL35	0.0143	0.711691
HSCB	0.0152	0.711273
EYA1	0.0017	0.710694
YARS2	2.31e-05	0.710602
TBC1D2	1.96e-05	0.710509
GMDS	0.00812	0.70861
COX10	0.000812	0.708
COIL	0.0289	0.707658
TSPAN6	0.00218	0.707413
ELOVL5	0.016	0.707248
NDUFAF2	0.00213	0.707092
ENO1	2.04e-05	0.706037
RRP1B	0.00286	0.70581
C1orf53	0.0441	0.705192
COA1	0.000888	0.704498
RHOG	0.00021	0.704291
RAB13	0.0151	0.704086
TSC22D1	0.000177	0.703499
AP2S1	0.0122	0.70321
ORC1	0.00561	0.703154
TTC1	0.000282	0.702839
MED25	0.0159	0.702236
NCBP1	0.004	0.701965
ZMAT2	0.000176	0.701634
MRPS18B	0.00175	0.70081
TRAP1	0.00425	0.699681
AHCTF1	1.7e-05	0.699215
SNORA67	0.00532	0.69883
UTP23	6.47e-05	0.698712
MED7	0.000446	0.698456
NAT9	0.000579	0.698172
BABAM1	0.0208	0.696373
CHCHD5	0.00204	0.696328
METTL21A	2.31e-05	0.696156
STK35	0.0144	0.695946
ODF2	5.19e-05	0.695789
DLGAP1-AS1	0.0387	0.694977
SLC52A2	0.00011	0.694916
RTCA	2.86e-05	0.694775
PAK4	0.0434	0.694722
SNORD16	0.000772	0.694675
LYRM1	0.0285	0.694388
PHF21B	0.0171	0.694351
E2F6	0.0113	0.692755
PRKCI	0.0165	0.69167
PFDN1	0.000226	0.691646
DHX34	1.13e-05	0.689927
CENPP	0.000456	0.689832
SNRPA	0.00231	0.68918
GPT2	0.0128	0.688722
EPS15L1	0.00663	0.687519
LHX1	0.00059	0.687336
C1QBP	1.06e-05	0.687263
TBL3	1.56e-05	0.686892
TMEM69	0.00399	0.686578
MED6	0.00371	0.686445
MDH1	0.000303	0.685946
RPS2	0.0141	0.685071
ACOT11	0.0161	0.684756
EPT1	0.00358	0.684553
UBTF	1.55e-05	0.68455
F12	0.0258	0.684261
TOMM40	0.013	0.683398
CBWD3	0.039	0.683227
DARS2	0.00502	0.681267
PLAGL2	8.13e-06	0.681253
SNAPC4	0.00313	0.680632
UCHL5	0.00358	0.679623
PGAM1	0.000166	0.678549
MYOM2	0.00185	0.678078
EIF3K	0.0455	0.677992
TRIM27	6.28e-05	0.677953
SYMPK	0.000457	0.677281
KLHL23	0.0252	0.677179
RRP12	0.00225	0.6766
SRFBP1	0.000599	0.676397
WASF2	0.0172	0.675726
TNFAIP3	0.000174	0.675169
EEF1B2	0.00315	0.674779
CUL4B	0.0033	0.674526
DCAF13	0.0424	0.674522
CENPA	0.000328	0.674404
TMED5	0.00528	0.673414
SNRPC	2.93e-05	0.672415
RNF144B	0.000294	0.671901
RAB5C	0.0013	0.671586
MT1A	3.32e-05	0.670951
NOL6	8.91e-05	0.669028
CENPM	0.0127	0.668704
LOC401127	0.00203	0.668548
HSPD1	0.000411	0.668489
EPG5	0.000999	0.668293
EEF1E1	0.0251	0.667457
PELP1	0.000805	0.666978
PPP1R10	0.00187	0.666336
UBE2V1	0.039	0.665874
RBBP4	0.00028	0.665284
ILF2	0.0102	0.665234
TPX2	0.0207	0.665128
MCEE	0.0195	0.664885
PPP2R2C	0.000371	0.663862
PRMT5	0.000276	0.663836
FBXO28	0.0111	0.663681
NAA35	1.07e-05	0.663608
SNRPG	0.00165	0.663591
RIPK2	0.0051	0.663324
TUSC3	0.000845	0.662721
TMED4	2.21e-05	0.662546
SFXN4	0.000652	0.662469
GTF2E1	0.000409	0.662264
PKMYT1	0.00584	0.661958
CNRIP1	0.000256	0.661241
FAM216A	0.0436	0.660695
GMPPB	0.00534	0.660647
SSR3	0.0191	0.660601
SMN2	0.0352	0.6606
CAMK2N2	0.00523	0.660463
SAP130	0.00906	0.660389
SKA1	0.00124	0.66035
BOLA3	0.0027	0.659745
GTF3C5	0.0208	0.659583
ACP1	0.00571	0.659462
PATE3	9.16e-06	0.659061
ZC3H8	1.14e-05	0.656875
SGO1	0.00763	0.656677
TMEM256	0.00068	0.656362
NFKBIZ	0.00597	0.655332
NUP85	0.0199	0.654441
MTX3	0.0157	0.654418
BUB3	0.000131	0.654274
PRKCSH	0.00812	0.65406
DONSON	0.0408	0.65365
LRRC8C	0.00196	0.653368
MTO1	0.0115	0.65326
IRAK1	0.00757	0.653259
DPY30	0.00671	0.65285
PRPF38A	0.000105	0.652771
SLC25A12	1.55e-05	0.652209
FBXO45	0.00739	0.652177
THG1L	0.0237	0.651774
RHOC	0.00401	0.651533
ABCG1	0.00962	0.650695
CATSPER2P1	0.000155	0.649557
ETNK1	0.00127	0.649371
ZNHIT3	0.00362	0.649276
TP53BP1	0.00307	0.649137
ZC3H3	0.000892	0.648634
DHX35	1.34e-05	0.648455
FASTKD3	0.000965	0.647743
DHX37	0.00922	0.646799
STIL	0.013	0.646723
COPS6	0.000102	0.646636
ATG10	0.000456	0.645995
GEMIN4	0.0126	0.645976
LETM1	0.0306	0.645311
C1orf109	0.00379	0.645295
PSMC5	0.0148	0.645263
ARPC5L	0.00128	0.645139
CCDC138	0.0156	0.645022
SMAP1	0.00268	0.644901
ANKRD27	4.8e-05	0.644718
FLVCR1-AS1	0.00996	0.64447
HMMR	0.00493	0.643993
CHERP	0.00646	0.643592
FKBP4	0.0221	0.643559
SNORD12	0.0371	0.643474
RALGAPB	0.000153	0.643212
H2AFY	0.0133	0.642927
SEC13	0.00688	0.642575
C17orf53	0.000218	0.64249
JUNB	0.00464	0.642303
ASUN	0.00908	0.64204
SLX1B	0.000191	0.641932
HSP90AB1	0.0212	0.641814
POLR3B	0.00262	0.641555
RPUSD3	0.00302	0.641059
PHLDA3	0.00375	0.64035
POP5	0.0431	0.640327
CDPF1	0.0134	0.640072
FASTKD1	4.03e-05	0.639955
ZXDC	0.00271	0.639414
NUP43	0.000567	0.637722
MRPS18A	2.55e-05	0.637527
KNTC1	0.00127	0.637386
RPRD1B	0.000417	0.637191
PSMD11	0.0127	0.637124
NAA25	0.0245	0.636918
SPCS3	0.000463	0.636655
LUZP1	0.00578	0.63626
C11orf74	0.0353	0.636199
DNAJB11	0.00131	0.636008
MOB1A	0.000387	0.635954
SLC4A1AP	0.00376	0.635954
UBA6	0.00165	0.635532
CCT8	0.00164	0.635176
HIST1H1C	0.00137	0.635143
HAS2-AS1	0.0276	0.634615
EIF4G3	0.0228	0.634576
UBE2H	0.00364	0.63381
EMC6	0.00589	0.633785
SNORD104	0.00243	0.633755
SLC35E3	0.00121	0.633268
SSR2	0.00449	0.633105
BCL2L11	0.000113	0.632966
ERGIC3	0.0125	0.632736
AKIRIN2	0.000463	0.632707
ANXA2R	1.57e-05	0.632235
SRGAP2	0.000216	0.632189
PGK1	0.0131	0.632155
NKRF	0.00519	0.63193
ATP5F1	0.000411	0.631877
ADNP	0.00256	0.63186
ARMCX5	0.00166	0.631142
UBE2M	4.5e-05	0.629349
AKIRIN1	1.37e-05	0.629222
ERI3	0.0168	0.629065
AARS2	0.00102	0.628977
ZNHIT6	0.00819	0.628878
HIF1A	0.00027	0.628816
MRPL38	0.000313	0.628732
CBLB	0.00011	0.628266
PARL	0.000214	0.627957
MCM7	0.0452	0.62769
MRPS27	6e-05	0.627602
KIF2C	0.000114	0.627553
TAF1B	0.016	0.627383
PRDX1	0.0135	0.627135
LSG1	1.94e-05	0.626983
PPWD1	0.019	0.626894
PRR32	0.00011	0.626744
FAM72D	0.000178	0.62673
KIF2A	0.00581	0.626622
SART3	0.0127	0.62548
ORMDL1	0.0106	0.624579
ANKZF1	0.0353	0.624257
BAG3	0.000897	0.623944
KPNA4	2.12e-05	0.623556
COLGALT1	0.00611	0.623349
RIDA	0.000804	0.623036
NUP35	0.000433	0.622948
PIGF	0.000899	0.622524
CELF1	0.0277	0.621458
CTR9	0.00274	0.621059
RNA5S9	0.00443	0.620952
LNPEP	0.0373	0.620941
RASSF7	0.000461	0.620879
GRWD1	0.00304	0.620602
SPEG	0.000596	0.619692
TUBA1C	0.00021	0.619394
MRPS23	0.0242	0.618571
PWP1	0.000958	0.618021
SMAP2	0.0315	0.617679
CSNK1A1	0.00091	0.617297
ALDH1B1	0.0075	0.617065
RNF216P1	0.000144	0.616404
CCDC34	0.0023	0.616404
GPATCH4	0.0148	0.616131
SLC35G1	0.000218	0.6161
LINC00461	0.00245	0.61526
MRPL47	0.000209	0.615033
PIGO	0.00811	0.614681
TFB2M	0.0136	0.614127
PHC3	0.000778	0.61384
PPAN	0.00825	0.613392
MRPL53	0.000886	0.612958
SEH1L	0.000324	0.612377
RPUSD1	0.0342	0.611376
THADA	0.000827	0.611256
SNORD65	0.0268	0.610831
UQCRB	0.0303	0.610723
ZBTB5	0.00749	0.610461
GEMIN2	0.0291	0.610209
EME1	0.0263	0.609639
WDR62	2.65e-05	0.609418
SLC25A19	0.00177	0.607712
KAT2A	0.00116	0.606952
KIAA1429	0.000481	0.606784
MSC	0.0176	0.605938
ATP2A2	0.043	0.605915
NUP54	0.016	0.605585
PEX13	0.0156	0.605047
MRPL22	0.0119	0.604888
RNA28S5	0.00117	0.604022
RRP1	0.00265	0.603839
PSMD4	0.00151	0.603829
FAM86C2P	0.000514	0.603804
CHTOP	0.00068	0.603788
RPS14	0.0171	0.603758
RNU6-1	0.00442	0.603475
PTDSS1	0.0269	0.603286
POLR1C	0.000109	0.603207
CCT3	6.26e-05	0.603144
SIAH2	0.00957	0.602828
WRAP53	1.47e-05	0.602673
P2RY8	0.00768	0.60193
RFC3	0.0266	0.601698
PPP4R3B	0.000827	0.601375
PPIG	0.0397	0.601266
ST3GAL1	0.00016	0.601145
HAUS8	0.0433	0.60098
ERCC3	0.00027	0.600825
KREMEN2	0.0396	0.600771
TMEM87B	0.0491	0.600667
RPF2	0.013	0.600491
KIAA1324L	0.0289	0.600433
MRPS10	0.003	0.600217
NIN	0.000378	0.599216
UHRF1BP1L	0.0283	0.598999
ARMC6	0.0202	0.59872
NCLN	0.00305	0.598681
RPE	0.00702	0.598603
PPT1	0.0148	0.59833
CDC42	0.0247	0.5978
TCF20	0.0218	0.59775
IRF3	0.0117	0.597735
GMEB2	0.00462	0.597401
WDR53	0.00106	0.596847
UQCRHL	0.0323	0.596495
ZNF341	0.0331	0.59625
LMO4	0.00858	0.59588
RNF138	0.000507	0.595756
PDIA6	0.0378	0.595729
ANKMY2	0.0378	0.59571
NKX3-2	0.00379	0.595336
KIAA1143	0.000554	0.595302
CDK5RAP1	0.0217	0.594688
EDEM2	0.0124	0.594144
ADNP2	0.0219	0.594098
DUS3L	0.000653	0.593994
SNORD48	0.00199	0.593879
MRPS15	0.0261	0.59369
SLC4A7	0.0188	0.593028
TOE1	0.00671	0.593021
WDCP	0.00149	0.592493
NFS1	0.00508	0.591765
USP39	0.0128	0.591609
OSBPL6	0.00166	0.591422
BMS1	0.00207	0.591111
ERCC6L	0.00387	0.590862
PCNA	0.012	0.58994
CCT6P1	0.00181	0.58911
ACTL6A	0.00316	0.588414
USP3	0.000405	0.587858
CLPP	0.0207	0.587844
ARHGEF2	0.00219	0.587819
AZIN1	0.0311	0.587174
DDX39B	0.00213	0.587009
MIS12	0.00697	0.586887
ERAL1	0.00248	0.586791
C1orf174	0.012	0.586434
RFESD	0.008	0.585826
RABEPK	0.0173	0.585255
NUP88	0.000554	0.585144
ERCC1	0.00274	0.585002
PSMD3	0.000616	0.58484
CCNL1	0.0157	0.584681
CITED2	4.86e-05	0.584534
IWS1	0.00747	0.584332
ACYP1	0.000215	0.583766
UBE2E3	0.000809	0.583668
TTC39B	0.000734	0.583375
NUP98	0.0174	0.582882
PIGP	0.0116	0.582765
UQCR10	0.000531	0.582545
POLA2	0.00349	0.582513
ZNF174	0.00143	0.582407
TM2D3	7.62e-05	0.581754
NOLC1	0.00587	0.581539
CEP83	0.00305	0.581124
SSB	0.0152	0.580997
DGAT1	0.0105	0.580893
WNT7B	0.00451	0.580743
SPESP1	0.00804	0.580341
S1PR5	0.000195	0.58021
DNTTIP1	0.000759	0.580116
MRPS22	0.00127	0.580099
MAP3K5	0.00383	0.579519
RAN	0.00048	0.57945
PPIL1	0.000114	0.579169
TXNDC9	0.00371	0.579112
MRPL15	0.000328	0.578988
COX5B	0.013	0.578807
NUP62	0.00286	0.578408
MTFR2	0.00619	0.577988
PDGFD	0.0151	0.577345
GJC1	0.0404	0.576681
ZDHHC13	6.99e-05	0.576669
FASTKD5	0.000472	0.576568
RNF5P1	0.000434	0.576452
HDAC3	0.0038	0.576118
SLC25A10	0.0156	0.575821
NME1-NME2	0.000328	0.57561
DAP3	0.000407	0.57531
LAGE3	0.00817	0.57519
ZBTB40	0.00772	0.575004
ZNF200	0.0293	0.574993
IMPDH2	0.000365	0.574459
MPLKIP	0.00607	0.574425
BRCA1	0.00657	0.573695
CDC40	0.0288	0.573454
HSPA14	0.000495	0.573135
RPS26	0.0107	0.573118
TSSC4	0.017	0.572811
EIF5B	0.0226	0.572782
FAM49B	0.048	0.572468
KAT14	0.022	0.572165
RPL41	0.0384	0.572068
CSPP1	3.75e-05	0.572012
PTPN1	0.0278	0.571441
STARD5	2.7e-05	0.571393
PPP1R13L	0.000648	0.57084
NUP205	0.00131	0.570834
TSSC1	0.0109	0.570747
KIF24	0.00181	0.570597
SEC22C	0.00206	0.570569
DRG2	0.00711	0.570431
LINC00938	4.12e-05	0.570177
SNORD3A	0.00453	0.569885
DNAJC5	0.00523	0.569815
R3HDM1	0.000485	0.56975
AZIN1-AS1	0.00349	0.569405
ENTPD7	0.00408	0.569154
TMEM268	0.00708	0.568978
HELLS	0.0191	0.568702
CAMK4	0.0323	0.568524
POLR2I	0.00675	0.568487
INPP4A	0.0271	0.566553
BNIP1	0.0278	0.566372
CRLF3	0.0291	0.566157
SHKBP1	0.0373	0.566067
MTF2	0.00103	0.56597
IKBIP	0.0428	0.565673
TEFM	0.000434	0.56554
ZNF668	0.000249	0.565351
ABCF1	0.038	0.565183
SLC35F6	0.00696	0.564889
CDC7	0.0151	0.564087
RNF181	0.00361	0.563339
ASB7	0.0034	0.562868
RASA2	0.0391	0.562728
SLC2A3	0.0491	0.562714
PRPF31	0.00207	0.562605
PKP4	0.00118	0.562426
TLK1	0.0499	0.562096
LRRC1	0.00067	0.562035
UPF3B	0.0171	0.561827
CCDC91	0.0107	0.561555
CHSY1	0.00107	0.561111
TMEM243	0.00105	0.56102
SNF8	0.000116	0.560441
GINS3	0.000213	0.56005
SMN1	0.00754	0.559988
GRPEL2	5.93e-05	0.559045
EAF2	0.00529	0.558189
ZNF586	0.00575	0.558129
BET1	0.0135	0.557879
C3	0.00634	0.557646
RUVBL2	0.00015	0.557368
UQCRH	0.000197	0.557318
PSG6	0.00317	0.557169
TMEM141	0.0039	0.557138
HILPDA	0.0111	0.556618
ASTN2	0.00167	0.556512
PSMB6	0.0148	0.556333
DUS4L	0.000251	0.556122
RPPH1	0.0377	0.555606
DNAJC10	0.0116	0.555414
ARPC4	0.00208	0.555172
IDH3B	0.000795	0.555153
LARS	0.000314	0.555126
GATA2	0.00114	0.55475
PMF1	0.000357	0.554264
AFTPH	0.000743	0.55375
MTG1	0.0106	0.553542
EXT2	0.0352	0.553409
CHRM3	0.00207	0.553247
MPDU1	0.0169	0.553066
PDLIM7	0.0192	0.552286
FAM168B	0.000165	0.552063
VKORC1L1	0.0231	0.551923
RELL2	0.0373	0.551718
N6AMT1	0.00438	0.55164
ACAP2	0.0412	0.551565
SPC24	0.00432	0.55153
CEP250	2.65e-05	0.551445
COX5A	0.0159	0.550483
YRDC	0.0177	0.550481
EXOSC2	0.000798	0.550183
CEBPZ	0.0149	0.550057
SCARNA10	0.00644	0.550034
PHAX	0.0172	0.54951
GSG2	0.00138	0.548778
STAG1	0.0233	0.548646
C6orf136	0.00137	0.548545
MRPL19	0.0478	0.548398
SFMBT1	0.00251	0.548257
SPATS2	0.000251	0.548154
SNORD35B	0.0224	0.547891
PUS7L	4.85e-05	0.547822
C1QL4	0.0273	0.547416
RMI1	0.00358	0.5473
DNM1L	0.0002	0.547102
TMEM14A	0.0165	0.547062
KPTN	0.00229	0.546871
NOC4L	0.002	0.546686
TCEB1	0.0306	0.545655
TMPO	0.0236	0.545236
GTPBP3	0.00841	0.545227
BBX	0.00425	0.545038
HIST2H2AC	0.0131	0.545018
NAP1L4	0.0259	0.544776
HRASLS	0.00591	0.544668
RINT1	0.00292	0.544513
SMAD6	0.000636	0.544368
TUFM	0.00126	0.5443
AGO2	0.00791	0.5437
SGTA	0.025	0.543512
MTERF3	0.00226	0.54347
PIDD1	0.00868	0.543215
POLR3E	8.12e-05	0.543162
DDX31	0.0197	0.542754
SLC39A7	0.0142	0.542634
PDCD5	0.00102	0.541345
TSTD1	0.000251	0.54133
DLST	0.00583	0.541198
CUTA	0.0132	0.540883
SLX4	0.00388	0.540706
LIX1L	0.0491	0.540325
MAT2B	0.000644	0.539415
TMEM42	0.00618	0.539409
HIST1H2BD	0.00715	0.539369
TES	0.0157	0.539304
FAM86B3P	0.0398	0.538614
SAFB2	0.00222	0.538542
SNORD36A	0.0206	0.538253
TRMT1L	0.00302	0.537996
PHF20	0.00583	0.537908
U2AF1L4	0.00142	0.537743
LIG3	0.00393	0.537405
PABPC4	0.00495	0.537123
PPAT	0.0028	0.536652
ITGB3BP	0.00163	0.536405
MYBBP1A	0.000236	0.536286
SSR1	0.0032	0.536245
C1orf112	0.0218	0.536119
MTA3	0.000752	0.535813
NUF2	0.000713	0.535769
LIG1	0.00516	0.535762
SLC9A3R1	0.00017	0.535638
WDR36	0.0313	0.53552
NKIRAS2	0.0049	0.534981
FAM50A	0.000174	0.534919
MFN2	1.48e-05	0.534737
VEGFA	0.0126	0.534634
TRMT6	0.000121	0.534597
SLIT3	0.0491	0.533858
PPRC1	0.0176	0.533678
VCP	0.0147	0.53317
TMEM41A	0.0407	0.53302
ATL2	0.00258	0.532378
EIF3E	0.0233	0.532016
NSF	4.39e-05	0.531918
NOC3L	0.0105	0.531622
RAB2A	0.0277	0.53114
MLF1	0.000166	0.530899
ZSCAN32	0.00157	0.530713
NUP188	0.00662	0.530658
DUSP5	0.0344	0.530592
INTS2	0.00216	0.530296
TIMM23	0.000711	0.530288
TRAF3	0.00259	0.530212
MRPS7	0.0064	0.530103
UBQLN1	0.000525	0.530094
MTMR3	0.0394	0.528997
ADGRL1	0.0461	0.528876
NCL	0.00928	0.528784
HNRNPAB	0.0399	0.527442
PRELID1	0.0264	0.527149
NBPF3	0.00308	0.52693
CNOT3	7.62e-05	0.526428
PXMP2	0.000822	0.526332
PAM16	0.000128	0.526311
DPM2	0.0337	0.525868
ORC3	0.00124	0.525752
RNF219	0.00456	0.525688
SNORD83B	0.000396	0.525175
DIP2A	0.0272	0.525025
LTV1	0.0028	0.524932
PTPRA	0.0413	0.524797
TTF1	0.00633	0.524778
RPLP1	0.0172	0.524764
HIST2H2AA3	0.0343	0.523806
MIIP	0.00327	0.523695
RBBP9	5.93e-05	0.523635
DOT1L	0.0205	0.523253
EIF2B4	0.0334	0.523137
TXNDC17	0.00229	0.522945
OMG	0.0096	0.522587
IFT20	0.0117	0.522442
RNF215	0.000532	0.522393
SNORA50C	0.00152	0.522314
ME1	0.0057	0.521494
SLC35E1	0.00851	0.521001
KRI1	0.00244	0.520944
BCAP29	0.00221	0.520631
MRM3	0.0179	0.52044
DCTPP1	0.0176	0.519589
SNORA84	0.0395	0.519179
ATRIP	0.0121	0.518835
UBXN2B	0.00414	0.518564
HIST1H3I///HIST1H3E	0.0124	0.518086
KLRG1	0.00648	0.517874
USP11	0.00196	0.517081
EFNA4	0.0116	0.516893
SEC61A2	0.00011	0.516716
ZBTB9	0.000114	0.516356
FITM2	0.00104	0.515915
TRMT10C	0.00549	0.515233
ATP5S	0.0384	0.515233
ATF2	0.045	0.5152
ZNF212	0.0192	0.515171
NRAV	0.00483	0.514843
SAFB	0.016	0.514518
FLCN	3.8e-05	0.514511
UFM1	0.0092	0.514418
DGUOK	0.0185	0.514366
ATG101	0.00693	0.514272
FANCD2	0.000759	0.514113
TLE3	0.0169	0.514111
UTP18	0.00355	0.51375
KDM3A	0.0301	0.513659
ECD	0.0195	0.513068
IRAK4	0.00302	0.511774
SPRYD4	0.00931	0.51175
TMEM39A	0.00307	0.511591
EOGT	0.00196	0.511319
TGFB3	0.00844	0.511178
NAIF1	0.0378	0.510863
FOXJ3	0.0332	0.510486
COA7	0.0496	0.510191
PDDC1	0.0273	0.510027
TOP3A	0.0147	0.509539
DNAJC25	0.00759	0.509403
TCIRG1	0.000525	0.509339
SDHAP1	0.00829	0.509126
FAM24B	9.29e-05	0.508901
CSDE1	0.046	0.508798
C12orf66	0.00849	0.508469
NOC2LP2	0.0228	0.508057
RAD54B	0.00555	0.507862
LRP5L	0.000433	0.507854
ACD	0.00272	0.507751
FLAD1	0.0378	0.507655
ZBED5	0.000385	0.507304
HSPA13	0.0019	0.507013
TIPRL	0.0108	0.506691
METTL1	0.018	0.50664
CKS2	0.0169	0.506043
VPS25	0.0256	0.505533
TOP1MT	0.0419	0.50552
DNPEP	0.00486	0.505138
INAFM1	0.00794	0.504956
ATP11C	0.00213	0.504866
KIFC1	0.00554	0.504798
SRP68	0.00267	0.504721
SNORA41	0.0423	0.504679
SNORA7B	0.0313	0.504648
NME4	0.000131	0.504539
FBXL6	0.0175	0.504009
LCOR	0.000882	0.503089
DNAJA3	0.021	0.503042
CLK3	0.000153	0.502868
BRWD3	0.000452	0.50202
TOP1P2	0.0174	0.502006
SEMA4F	0.000483	0.501807
TANC2	0.00625	0.501586
SAPCD2	0.00417	0.499931
CCDC24	0.000249	0.499507
TXN	0.0039	0.499462
GORAB	0.000224	0.498787
MEX3C	0.0131	0.498073
RAD51C	0.00185	0.497953
HIST2H2AA4	0.022	0.497892
PPP2CA	0.00731	0.49781
NAPG	0.00456	0.497766
C2CD5	0.00532	0.497637
HOXD3	0.00456	0.497605
RNF40	0.0197	0.497496
AP3S1	0.026	0.497062
NRDC	0.013	0.49698
C7orf49	0.000247	0.496955
GTPBP8	0.00497	0.496419
BARD1	0.02	0.496281
SOCS3	0.00687	0.496261
CPSF4	0.000204	0.49626
E2F8	0.00844	0.496249
RNF149	0.00136	0.495412
C6orf89	0.025	0.495266
COX7C	0.0203	0.494866
METTL23	0.0354	0.494646
CLUH	0.0225	0.494385
MELK	0.00611	0.494337
UBE2G1	0.000345	0.494254
TMCO6	0.0185	0.493634
GATSL3	0.0134	0.493625
RABGGTB	0.0286	0.493192
CACTIN	0.0453	0.492224
HTR2C	0.0017	0.492052
UTP4	0.000123	0.491879
EIF2B1	0.00534	0.491587
LRRC14	0.00681	0.491275
SLC38A10	0.00303	0.491104
GARS	0.00261	0.490396
SNRPB2	9.86e-05	0.490147
ILF3	0.00174	0.489939
PSMA4	0.0063	0.48987
HAND2	5.63e-05	0.489375
C1orf50	0.0429	0.488948
FAM160A2	0.000404	0.488933
ARL5B	0.044	0.488927
NRBP1	0.00598	0.488791
FAF2	0.000983	0.488538
TIAL1	0.00549	0.488537
COX6A1	0.00642	0.487948
MRPL10	0.0343	0.487338
APLP1	0.0234	0.48721
TRPC4AP	0.00114	0.486961
CTU2	0.0498	0.486575
C1GALT1	0.00541	0.486328
PSMD13	0.0229	0.486127
NR1H2	0.00193	0.485979
HSPA9	0.0238	0.485675
BCS1L	0.00505	0.485287
UBAC2	0.0418	0.485159
RPA1	0.00909	0.484712
VDR	0.0106	0.48467
SGF29	0.000307	0.484016
PELI1	0.0334	0.483934
TOMM6	0.00686	0.48316
DDX1	0.0297	0.483112
SP140L	0.000901	0.482596
C17orf49	0.000782	0.482056
PHACTR4	0.00281	0.482017
MED28	0.0146	0.482001
UBR2	0.00232	0.481575
POFUT1	0.0401	0.481566
SEC61G	0.00664	0.481509
RFXAP	0.0252	0.481303
FOXP1	0.014	0.481284
UBA5	0.00787	0.481261
DIDO1	0.0256	0.48124
ZUFSP	0.0235	0.481078
PDSS1	0.000274	0.480926
TMEM186	0.0193	0.48064
DOLPP1	0.0423	0.480374
UTP11	0.0252	0.480062
RUNDC1	0.0072	0.479989
RBM12	0.0027	0.479898
SF3B5	0.00116	0.479573
FBXO4	0.0373	0.479423
SLC25A15	0.0342	0.479328
CHAC2	0.0421	0.478895
RBM28	0.00286	0.478505
ANKHD1	0.00184	0.478224
FBXL13	0.0418	0.478197
SPAG9	0.00125	0.477448
KIAA0907	0.00151	0.477248
KRT15	0.00671	0.477211
XKR8	0.0173	0.477052
AGO3	0.00112	0.47661
PPIL3	0.00849	0.476385
OSTC	0.0153	0.476277
ETF1	0.00124	0.47626
SF3B4	0.00675	0.475445
CLPX	0.000448	0.474994
DHX9	0.000845	0.474984
BCL10	0.027	0.474358
RFX2	0.00823	0.474357
DXO	0.00187	0.474316
JAK2	0.000419	0.47389
ALG10	0.013	0.473837
ASPH	0.0428	0.473793
TMEM183B	0.0387	0.473747
PER2	0.00276	0.47319
GPR18	0.0143	0.47277
LTB4R	0.00584	0.472292
PHF19	0.0392	0.47223
SNIP1	0.0107	0.471373
CNOT10	0.00952	0.471139
ASPHD2	0.000769	0.470948
PRDM2	0.0239	0.470933
PCNT	0.00703	0.470609
TEX9	0.0126	0.470127
RPL35A	0.0444	0.46996
SPATA22	0.00621	0.469462
RPL18A	0.00605	0.469391
MCCC2	0.0318	0.469341
RBM22	0.00228	0.468869
CNTRL	0.00899	0.468516
CKLF	0.0281	0.468479
BRCC3	0.00176	0.46835
CPSF3	0.043	0.467987
TRAF3IP1	0.0267	0.467747
DOCK9	0.0204	0.467587
ANKRD20A1	0.0105	0.467166
DDX56	0.0323	0.46696
TBX19	0.0407	0.466915
AMER1	0.00684	0.466862
HNRNPR	0.0499	0.466641
RRP9	0.0174	0.466551
ZFR	0.00124	0.466279
FUT11	0.00115	0.466019
MATR3	0.0448	0.465821
LSR	0.0264	0.464966
EXOSC1	0.0328	0.464829
C17orf58	0.0298	0.464814
GLMN	0.000202	0.464564
FLYWCH1	0.00825	0.46456
VPS72	0.0281	0.464462
GNAI3	0.0269	0.464043
MIR564	0.0089	0.463764
ZNF275	0.0113	0.463296
MRPS25	0.0425	0.46323
SIX1	0.005	0.462907
PSMD5	0.00907	0.462875
MAD1L1	0.00184	0.462566
RHNO1	3.46e-05	0.462565
IMPA1	0.00901	0.462326
EYA3	0.00366	0.462037
FAN1	0.000715	0.461933
POLE	0.0177	0.461672
EIF4G2	0.00228	0.4614
ELK4	0.000336	0.461248
SNORD11	0.0185	0.46094
SPG21	0.0349	0.460869
TMEM183A	0.00832	0.460777
HOXB3	0.0111	0.460623
ZNF195	0.00901	0.460358
NPDC1	0.00345	0.460243
MFAP3	0.0498	0.460166
RNF20	0.0134	0.460076
SNORA63	0.0277	0.459849
S100PBP	0.0224	0.459784
SAMD4A	0.0138	0.459466
FBXO46	0.00837	0.459051
TMEM57	0.0221	0.458907
GOLIM4	0.00118	0.458857
C12orf43	0.0453	0.458624
GTPBP2	0.00185	0.458436
CBLL1	0.00798	0.458359
SENP5	0.000609	0.457681
REXO1	0.000911	0.457554
PMPCB	0.0266	0.457475
POU2F1	0.0131	0.457353
MAPRE1	0.00279	0.457273
RPL24	0.036	0.457263
XPO5	0.000463	0.457123
LFNG	0.0141	0.45708
HIRIP3	0.0378	0.456892
MANF	0.00393	0.456798
TP53I3	0.00528	0.456702
RNF8	0.0393	0.456475
STX16	0.00403	0.456201
ITPRIPL2	0.000491	0.455987
USP48	0.0181	0.455759
SHOX2	0.00514	0.455573
MSH2	0.0166	0.455432
CAPN10	0.0299	0.454523
MMS22L	0.00681	0.45409
NPHP1	0.00533	0.453811
TMEM230	0.00453	0.453771
GAR1	0.0166	0.45309
HNRNPCL3	0.00455	0.452842
RAD51B	0.00692	0.452729
PHF14	0.0105	0.452453
SFXN2	0.00759	0.452405
PTK2	0.013	0.452151
MICALL1	0.0208	0.451988
CMC1	0.00369	0.451746
RBBP6	0.00413	0.451377
ZNF213	0.00823	0.451011
SEMA6B	0.0479	0.450979
SLC30A6	0.016	0.450734
KCTD18	0.0411	0.450725
RGS9BP	0.00155	0.450466
LOC283788	0.0263	0.450207
TAF13	0.00362	0.450168
GATA6	0.000567	0.450057
LYPLA2	0.00139	0.449825
MCL1	0.0437	0.449824
NUDT3	0.00222	0.448521
HNRNPM	0.0061	0.448519
PREX1	0.00167	0.448325
GGH	0.016	0.448207
GCNT3	0.00195	0.448188
POFUT2	0.00584	0.4481
SMARCAL1	0.0188	0.447962
SCAND2P	0.0364	0.447861
XPO1	0.00211	0.447492
NFAT5	0.000531	0.447396
CYB5RL	0.0496	0.447187
LIN9	0.000302	0.446815
SEC14L2	0.000936	0.446794
KRR1	0.00555	0.446564
PHKG2	0.0303	0.446462
ICK	0.00353	0.445941
FOXN2	0.00794	0.44572
SURF4	0.0183	0.445028
NDUFB3	0.0497	0.4449
NPRL3	0.0269	0.44449
OSBPL11	0.00136	0.444467
GBP5	0.0478	0.444467
ZNF322	0.00537	0.444452
RSBN1	0.00244	0.444426
SURF6	0.0114	0.44424
VTA1	0.0228	0.444213
SNORD3D	0.000746	0.444005
INCENP	0.00419	0.443996
WBP11	0.00658	0.443975
CASP8	0.00251	0.443973
ZNF300P1	0.0197	0.443798
SEC61B	0.000206	0.443517
LOC648987	0.0339	0.44348
GAN	0.00364	0.443118
ACCS	0.00962	0.44266
SNORA3B	0.00926	0.442628
FAM188B	0.0177	0.442351
RAET1G	0.000769	0.441515
TCAIM	0.000334	0.441441
METTL6	0.00332	0.441215
DERL2	0.0244	0.44081
USP30	0.00411	0.440766
RNPC3	0.0173	0.440272
TEAD1	0.00264	0.440156
VIPR1	0.000331	0.439704
SON	0.0226	0.439575
LIN37	0.0147	0.438739
CASP9	0.022	0.43863
TOR1AIP2	0.0234	0.438451
POLR1B	0.0152	0.438289
HOXA2	0.0334	0.437747
AP4M1	0.00424	0.437507
OPHN1	0.000538	0.437347
ZFAND6	0.0185	0.437333
ADAM21P1	0.049	0.437145
CCDC9	0.0153	0.437064
SPANXN4	0.0165	0.436859
PDCD10	0.0195	0.436636
ATRAID	0.00357	0.436146
DDX51	0.0182	0.435919
HCG27	0.00443	0.435906
PRICKLE3	0.0139	0.435393
PDCD11	0.00602	0.434671
OGDH	0.00703	0.434238
PABPC1	0.00989	0.434087
STRIP2	0.000143	0.434069
SLC38A5	0.000829	0.433896
SNORD99	0.00443	0.43376
BRAP	0.00544	0.433378
MRM1	0.0033	0.432922
CALB2	0.0264	0.432174
GPATCH1	0.0462	0.431929
HIST1H4J	0.0109	0.431648
FAM171B	0.0297	0.431534
MOGS	0.00985	0.4315
PRMT7	0.000488	0.431206
SH3GL1	0.0378	0.431173
SLC4A8	0.000722	0.431094
CHRAC1	0.00323	0.430677
RPS13	0.0476	0.430432
MAGEA2	0.00836	0.430351
MKI67	0.0155	0.4301
SMCO1	0.0118	0.430042
LMLN	0.01	0.429692
MCRIP2	0.0123	0.429659
WDR76	0.00692	0.429608
RNF217	0.017	0.429576
C17orf100	0.0392	0.429108
POLH	0.0315	0.429096
FGF12	0.0262	0.428997
NBN	0.0375	0.428864
ZNF227	0.0204	0.428627
MBD3L5	0.0268	0.428286
GP1BA	0.0205	0.42816
OR4K14	0.0227	0.427797
BEX5	0.00677	0.427543
KIF2B	0.0133	0.427139
CACNG1	0.00156	0.426637
C3orf58	0.0345	0.426551
FEZF1-AS1	0.00521	0.426401
LYPD5	0.000398	0.42623
ATP13A3	0.0255	0.425909
NCAPH2	0.0131	0.425892
RAB43	0.0371	0.425258
MAP1A	0.0264	0.424935
XKR9	0.00213	0.424902
LOC100131023	0.00643	0.424756
FIRRE	0.016	0.424661
MAPK10	0.00237	0.424259
TTC31	0.0361	0.424136
PRDM16	0.0127	0.424131
RPL13AP3	0.000642	0.423825
FAM181B	0.000892	0.423765
MSX2P1	0.00251	0.423728
CGB2	0.00732	0.42329
TBC1D3B	0.0355	0.423034
FAM110B	0.000692	0.422648
ING4	0.00456	0.422426
GNAL	0.0357	0.422353
LOC283713	0.00592	0.422324
CCDC184	0.000309	0.422307
TMEM254	0.0234	0.422143
HIST2H2BE	0.00169	0.422
ZNF607	0.00361	0.421925
SYPL1	0.0493	0.421904
FMO3	0.0252	0.42149
XKR4	0.00789	0.420835
KANK4	0.00412	0.420755
GRM5	0.00677	0.42062
NRAP	0.0182	0.420485
KLF8	0.00196	0.42016
EFCAB1	0.0057	0.420144
TCP10	0.029	0.42007
ITPRIPL1	0.0337	0.419955
ORAI3	0.0453	0.419866
ADAMTS3	0.0451	0.419817
S100A7	0.00968	0.419534
NDUFA4	0.0156	0.419518
CCT5	0.0279	0.419419
UBE2V2	0.0159	0.41917
DOPEY2	0.0306	0.41852
GVINP1	0.0097	0.418462
TFAP2B	0.00328	0.41816
FNIP1	0.00971	0.417926
RTN3	0.00927	0.41776
SLC9B1	0.0465	0.417501
OTUD5	0.0116	0.417439
SERHL2	0.0232	0.417194
TMEM70	0.00499	0.417158
LRRN4CL	0.0215	0.416832
HSD17B7P2	0.0456	0.416764
TPT1	0.00453	0.415933
TMPRSS5	0.0166	0.41589
MAML3	0.00432	0.415317
SLC16A7	0.00607	0.415028
CDKL3	0.0111	0.414664
TRIP4	0.00562	0.414611
GNB5	0.0494	0.414475
MIF4GD	0.0234	0.414468
MS4A7	0.0458	0.41413
NUDT10	0.00768	0.414113
GREM1	0.018	0.413757
ZNF404	0.00296	0.413757
C7orf26	0.00302	0.413253
ZFP28	0.000531	0.412647
EEF1AKMT1	0.00265	0.412634
CNNM1	0.0419	0.412143
CHRM1	0.000856	0.412126
CSNK2A2	0.00349	0.411921
CNTN1	0.0139	0.411864
KRBOX4	0.0358	0.411828
CCR6	0.047	0.411583
FRS2	0.00372	0.411537
CHMP4A	0.0185	0.411524
ZNF470	0.00514	0.411425
PARP11	0.044	0.410833
NCOA5	0.00858	0.410019
L3MBTL1	0.0049	0.409991
LDLR	0.0115	0.409872
KANSL1L	0.0342	0.409833
PIGT	0.00811	0.40958
AASS	0.0328	0.409485
ST7L	0.00901	0.409116
MRPS36	0.0116	0.409064
EIF2AK1	0.0155	0.408936
RPS24	0.00329	0.408538
SGCE	0.0391	0.408378
CDIP1	0.0458	0.40826
MRPL57	0.00405	0.40815
GPR89B	0.00869	0.407966
PNPLA4	0.00745	0.407451
PRELP	0.0221	0.407091
NUCKS1	0.00273	0.40687
VIM	0.0199	0.406636
MANEA	0.00555	0.406558
GSPT2	0.0345	0.40631
SNX21	0.0476	0.406199
KLHL41	0.00431	0.405523
ZNF135	0.0339	0.405521
ZNF93	0.0364	0.405485
CASQ2	0.0363	0.405103
BMP2K	0.0392	0.404641
KRBA1	0.0147	0.404517
SCARA3	0.00196	0.404217
C19orf25	0.000812	0.404157
LOC153577	0.00451	0.404046
CCDC110	0.0495	0.404014
ESR1	0.00259	0.403774
ATG2B	0.00114	0.403125
MCF2	0.0404	0.403089
PDPK1	0.0328	0.403087
RRN3P2	0.0094	0.402999
MMGT1	0.000984	0.402849
PRELID3A	0.0244	0.402828
SMC6	0.0376	0.402678
ZNF81	0.0318	0.402417
MOCS1	0.00218	0.402329
RPAIN	0.00391	0.40208
ADAMTS2	0.0346	0.402036
TWSG1	0.00777	0.401416
RAD51	0.000206	0.401087
KCTD1	0.0036	0.400775
ACBD4	0.0411	0.400744
ZNF626	0.00055	0.400733
RUBCN	0.0289	0.400552
CIB2	0.0312	0.400494
BNIP3L	0.00587	0.400262
KLF5	0.0436	0.400144
VPS8	0.00528	0.399921
SPRTN	0.00166	0.399865
LOC151174	0.0156	0.399323
VAMP4	0.00989	0.399254
ZNF76	0.0424	0.39917
LY6G5C	0.02	0.399119
SLC16A5	0.00201	0.399032
RAP2B	0.0172	0.398535
DUSP9	0.0156	0.398516
MSL3	0.00726	0.398505
C7orf25	0.0112	0.398374
GAS2	0.00442	0.398342
BTBD1	0.00196	0.398233
VPS13C	0.0294	0.398088
C2orf88	0.0156	0.397698
PCF11	0.00819	0.397281
TROAP	0.00429	0.397025
SH3YL1	0.00491	0.396715
NMRK1	0.0177	0.396495
RAB18	0.00273	0.396367
TMEM181	0.00647	0.396266
ZCCHC9	0.035	0.396039
PRB3	0.00237	0.395928
HEPH	0.0496	0.395791
DUT	0.018	0.395634
PSEN1	0.0218	0.395404
CRISPLD2	0.00582	0.395129
MKRN2	0.00781	0.394839
ZMIZ2	0.00953	0.394588
C7orf57	0.0156	0.394005
COX20	0.00861	0.39389
POGZ	0.0232	0.39361
LRRN3	0.0285	0.393367
LMO7	0.0218	0.392926
BICD1	0.00855	0.392892
TBC1D8B	0.0115	0.391997
CLTCL1	0.0173	0.391112
IFNLR1	0.00129	0.390755
ABCD3	0.00709	0.390555
TOX4	0.0138	0.390168
REV3L	0.000939	0.389389
SH2D4A	0.00963	0.388901
BNIP2	0.0195	0.388869
PCYT2	0.000726	0.387938
SNX3	0.0155	0.387418
ZNF701	0.00663	0.387071
XPNPEP3	0.0218	0.387033
NDFIP1	0.043	0.386892
ADH5	0.0292	0.386459
COQ9	0.0358	0.385961
KIF20B	0.0124	0.385802
ANKRD23	0.000785	0.385656
CACFD1	0.00108	0.385621
CSRNP3	0.00211	0.384908
PWWP2B	0.0399	0.384278
ZNF500	0.0318	0.384231
FAM46B	0.00462	0.3842
EHD3	0.00736	0.384078
ZNF37A	0.00568	0.383981
LMBRD2	0.005	0.383903
MMP11	0.0491	0.383232
GALNS	0.00457	0.383156
USP38	0.0149	0.382979
CFAP61	0.0157	0.38296
[truncated: 1,932 more rows]

## Sheet: Table S4b
Table S4b. Down-regulated miRNAs target gene from GSE31909
Gene symbol	Gene name
ABCG1	ATP binding cassette subfamily G member 1(ABCG1)
ADAM19	ADAM metallopeptidase domain 19(ADAM19)
ADAMTS9	ADAM metallopeptidase with thrombospondin type 1 motif 9(ADAMTS9)
ADM	adrenomedullin(ADM)
AGO3	argonaute 3, RISC catalytic component(AGO3)
AKAP12	A-kinase anchoring protein 12(AKAP12)
AKIRIN1	akirin 1(AKIRIN1)
AMER1	APC membrane recruitment protein 1(AMER1)
ANKMY2	ankyrin repeat and MYND domain containing 2(ANKMY2)
ANKRD27	ankyrin repeat domain 27(ANKRD27)
ANKZF1	ankyrin repeat and zinc finger domain containing 1(ANKZF1)
AP2M1	adaptor related protein complex 2 mu 1 subunit(AP2M1)
AP3S1	adaptor related protein complex 3 sigma 1 subunit(AP3S1)
AP4M1	adaptor related protein complex 4 mu 1 subunit(AP4M1)
ARL5B	ADP ribosylation factor like GTPase 5B(ARL5B)
ARMC10	armadillo repeat containing 10(ARMC10)
ATF2	activating transcription factor 2(ATF2)
ATL2	atlastin GTPase 2(ATL2)
ATP2A2	ATPase sarcoplasmic/endoplasmic reticulum Ca2+ transporting 2(ATP2A2)
AZIN1	antizyme inhibitor 1(AZIN1)
BCAP29	B-cell receptor associated protein 29(BCAP29)
BMI1	BMI1 proto-oncogene, polycomb ring finger(BMI1)
BRWD3	bromodomain and WD repeat domain containing 3(BRWD3)
BZW2	basic leucine zipper and W2 domains 2(BZW2)
C1GALT1	core 1 synthase, glycoprotein-N-acetylgalactosamine 3-beta-galactosyltransferase 1(C1GALT1)
CBLB	Cbl proto-oncogene B(CBLB)
CCDC93	coiled-coil domain containing 93(CCDC93)
CDC25A	cell division cycle 25A(CDC25A)
CDC40	cell division cycle 40(CDC40)
CDCA7	cell division cycle associated 7(CDCA7)
CELF1	CUGBP, Elav-like family member 1(CELF1)
CHSY1	chondroitin sulfate synthase 1(CHSY1)
CITED2	Cbp/p300 interacting transactivator with Glu/Asp rich carboxy-terminal domain 2(CITED2)
COIL	coilin(COIL)
COPS7B	COP9 signalosome subunit 7B(COPS7B)
COX10	COX10, heme A:farnesyltransferase cytochrome c oxidase assembly factor(COX10)
COX5A	cytochrome c oxidase subunit 5A(COX5A)
CSNK2A1	casein kinase 2 alpha 1(CSNK2A1)
CSRNP1	cysteine and serine rich nuclear protein 1(CSRNP1)
CTNNBL1	catenin beta like 1(CTNNBL1)
CUL4B	cullin 4B(CUL4B)
DCUN1D3	defective in cullin neddylation 1 domain containing 3(DCUN1D3)
DGKD	diacylglycerol kinase delta(DGKD)
DHX35	DEAH-box helicase 35(DHX35)
DHX36	DEAH-box helicase 36(DHX36)
DNAJC10	DnaJ heat shock protein family (Hsp40) member C10(DNAJC10)
DOLPP1	dolichyldiphosphatase 1(DOLPP1)
DOT1L	DOT1 like histone lysine methyltransferase(DOT1L)
DPH2	DPH2 homolog(DPH2)
DSN1	DSN1 homolog, MIS12 kinetochore complex component(DSN1)
DUSP5	dual specificity phosphatase 5(DUSP5)
E2F6	E2F transcription factor 6(E2F6)
EGLN1	egl-9 family hypoxia inducible factor 1(EGLN1)
EIF4E2	eukaryotic translation initiation factor 4E family member 2(EIF4E2)
EIF4EBP1	eukaryotic translation initiation factor 4E binding protein 1(EIF4EBP1)
EIF4G2	eukaryotic translation initiation factor 4 gamma 2(EIF4G2)
EIF5B	eukaryotic translation initiation factor 5B(EIF5B)
EML4	echinoderm microtubule associated protein like 4(EML4)
ERRFI1	ERBB receptor feedback inhibitor 1(ERRFI1)
ETNK1	ethanolamine kinase 1(ETNK1)
ETV4	ETS variant 4(ETV4)
EYA1	EYA transcriptional coactivator and phosphatase 1(EYA1)
EYA3	EYA transcriptional coactivator and phosphatase 3(EYA3)
EYA4	EYA transcriptional coactivator and phosphatase 4(EYA4)
FAM168B	family with sequence similarity 168 member B(FAM168B)
FAM49B	family with sequence similarity 49 member B(FAM49B)
FAM60A	family with sequence similarity 60 member A(FAM60A)
FAM81A	family with sequence similarity 81 member A(FAM81A)
FMNL2	formin like 2(FMNL2)
FOXJ3	forkhead box J3(FOXJ3)
FOXN2	forkhead box N2(FOXN2)
FOXP1	forkhead box P1(FOXP1)
FUT11	fucosyltransferase 11(FUT11)
GAN	gigaxonin(GAN)
GCNT3	glucosaminyl (N-acetyl) transferase 3, mucin type(GCNT3)
GEM	GTP binding protein overexpressed in skeletal muscle(GEM)
GEMIN2	gem nuclear organelle associated protein 2(GEMIN2)
GJC1	gap junction protein gamma 1(GJC1)
GNAI3	G protein subunit alpha i3(GNAI3)
GOSR2	golgi SNAP receptor complex member 2(GOSR2)
GPATCH1	G-patch domain containing 1(GPATCH1)
GRB2	growth factor receptor bound protein 2(GRB2)
GRPEL2	GrpE like 2, mitochondrial(GRPEL2)
GSK3B	glycogen synthase kinase 3 beta(GSK3B)
GTPBP2	GTP binding protein 2(GTPBP2)
GXYLT1	glucoside xylosyltransferase 1(GXYLT1)
H2AFY	H2A histone family member Y(H2AFY)
HBEGF	heparin binding EGF like growth factor(HBEGF)
HOXA5	homeobox A5(HOXA5)
HOXB2	homeobox B2(HOXB2)
HOXB6	homeobox B6(HOXB6)
HSPA9	heat shock protein family A (Hsp70) member 9(HSPA9)
ICK	intestinal cell kinase(ICK)
ID1	inhibitor of DNA binding 1, HLH protein(ID1)
IFI44	interferon induced protein 44(IFI44)
IGF1R	insulin like growth factor 1 receptor(IGF1R)
IGF2BP3	insulin like growth factor 2 mRNA binding protein 3(IGF2BP3)
INPP4A	inositol polyphosphate-4-phosphatase type I A(INPP4A)
JAK2	Janus kinase 2(JAK2)
KCNQ3	potassium voltage-gated channel subfamily Q member 3(KCNQ3)
KCTD5	potassium channel tetramerization domain containing 5(KCTD5)
KDM3A	lysine demethylase 3A(KDM3A)
KIAA1217	KIAA1217(KIAA1217)
KIAA1324L	KIAA1324 like(KIAA1324L)
KIF2A	kinesin family member 2A(KIF2A)
KLHL23	kelch like family member 23(KLHL23)
KPNA4	karyopherin subunit alpha 4(KPNA4)
LIMS1	LIM zinc finger domain containing 1(LIMS1)
LIN28B	lin-28 homolog B(LIN28B)
LUZP1	leucine zipper protein 1(LUZP1)
MAPK10	mitogen-activated protein kinase 10(MAPK10)
MATR3	matrin 3(MATR3)
MCFD2	multiple coagulation factor deficiency 2(MCFD2)
MCL1	BCL2 family apoptosis regulator(MCL1)
MED28	mediator complex subunit 28(MED28)
MED8	mediator complex subunit 8(MED8)
MEX3C	mex-3 RNA binding family member C(MEX3C)
MFAP3	microfibrillar associated protein 3(MFAP3)
MLF1	myeloid leukemia factor 1(MLF1)
MRPS10	mitochondrial ribosomal protein S10(MRPS10)
MSI2	musashi RNA binding protein 2(MSI2)
MTF2	metal response element binding transcription factor 2(MTF2)
MTFR1	mitochondrial fission regulator 1(MTFR1)
MTX2	metaxin 2(MTX2)
MTX3	metaxin 3(MTX3)
NAA25	N(alpha)-acetyltransferase 25, NatB auxiliary subunit(NAA25)
NAB1	NGFI-A binding protein 1(NAB1)
NAMPT	nicotinamide phosphoribosyltransferase(NAMPT)
NAPG	NSF attachment protein gamma(NAPG)
NCEH1	neutral cholesterol ester hydrolase 1(NCEH1)
NCL	nucleolin(NCL)
NFS1	NFS1, cysteine desulfurase(NFS1)
NKRF	NFKB repressing factor(NKRF)
NOTCH2	notch 2(NOTCH2)
NPC1	NPC intracellular cholesterol transporter 1(NPC1)
NR2C2	nuclear receptor subfamily 2 group C member 2(NR2C2)
NRAS	neuroblastoma RAS viral oncogene homolog(NRAS)
NRBP1	nuclear receptor binding protein 1(NRBP1)
NREP	neuronal regeneration related protein(NREP)
NRP2	neuropilin 2(NRP2)
OPHN1	oligophrenin 1(OPHN1)
ORMDL1	ORMDL sphingolipid biosynthesis regulator 1(ORMDL1)
OSBPL11	oxysterol binding protein like 11(OSBPL11)
PAK4	p21 (RAC1) activated kinase 4(PAK4)
PGS1	phosphatidylglycerophosphate synthase 1(PGS1)
PHACTR4	phosphatase and actin regulator 4(PHACTR4)
PHAX	phosphorylated adaptor for RNA export(PHAX)
PHF21B	PHD finger protein 21B(PHF21B)
PITPNC1	phosphatidylinositol transfer protein, cytoplasmic 1(PITPNC1)
PITX2	paired like homeodomain 2(PITX2)
PKP4	plakophilin 4(PKP4)
PLAGL2	PLAG1 like zinc finger 2(PLAGL2)
PLOD2	procollagen-lysine,2-oxoglutarate 5-dioxygenase 2(PLOD2)
PNN	pinin, desmosome associated protein(PNN)
POLE3	DNA polymerase epsilon 3, accessory subunit(POLE3)
POLR3G	RNA polymerase III subunit G(POLR3G)
POU2F1	POU class 2 homeobox 1(POU2F1)
PPAT	phosphoribosyl pyrophosphate amidotransferase(PPAT)
PPIC	peptidylprolyl isomerase C(PPIC)
PPP1R10	protein phosphatase 1 regulatory subunit 10(PPP1R10)
PPP2R2B	protein phosphatase 2 regulatory subunit Bbeta(PPP2R2B)
PRKCI	protein kinase C iota(PRKCI)
PROCR	protein C receptor(PROCR)
PTDSS1	phosphatidylserine synthase 1(PTDSS1)
PTGS2	prostaglandin-endoperoxide synthase 2(PTGS2)
PTPN1	protein tyrosine phosphatase, non-receptor type 1(PTPN1)
RAB27B	RAB27B, member RAS oncogene family(RAB27B)
RAPGEF5	Rap guanine nucleotide exchange factor 5(RAPGEF5)
RASA2	RAS p21 protein activator 2(RASA2)
RBM12	RNA binding motif protein 12(RBM12)
RBM18	RNA binding motif protein 18(RBM18)
RCN1	reticulocalbin 1(RCN1)
RFXANK	regulatory factor X associated ankyrin containing protein(RFXANK)
RIMS2	regulating synaptic membrane exocytosis 2(RIMS2)
RNF138	ring finger protein 138(RNF138)
RNF144A	ring finger protein 144A(RNF144A)
RNF20	ring finger protein 20(RNF20)
RNF219	ring finger protein 219(RNF219)
RPE	ribulose-5-phosphate-3-epimerase(RPE)
RRM1	ribonucleotide reductase catalytic subunit M1(RRM1)
RYK	receptor-like tyrosine kinase(RYK)
S100PBP	S100P binding protein(S100PBP)
SAMD4A	sterile alpha motif domain containing 4A(SAMD4A)
SCHIP1	schwannomin interacting protein 1(SCHIP1)
SEC61A2	Sec61 translocon alpha 2 subunit(SEC61A2)
SEH1L	SEH1 like nucleoporin(SEH1L)
SEMA4F	ssemaphorin 4F(SEMA4F)
SH2B3	SH2B adaptor protein 3(SH2B3)
SH3KBP1	SH3 domain containing kinase binding protein 1(SH3KBP1)
SKIL	SKI like proto-oncogene(SKIL)
SLC20A1	solute carrier family 20 member 1(SLC20A1)
SLC25A15	solute carrier family 25 member 15(SLC25A15)
SLC2A1	solute carrier family 2 member 1(SLC2A1)
SLC30A5	solute carrier family 30 member 5(SLC30A5)
SLC30A6	solute carrier family 30 member 6(SLC30A6)
SLC38A1	solute carrier family 38 member 1(SLC38A1)
SLC4A7	solute carrier family 4 member 7(SLC4A7)
SLC5A6	solute carrier family 5 member 6(SLC5A6)
SON	SON DNA binding protein(SON)
SP4	Sp4 transcription factor(SP4)
SPAG9	sperm associated antigen 9(SPAG9)
SPATS2	spermatogenesis associated serine rich 2(SPATS2)
SPRYD4	SPRY domain containing 4(SPRYD4)
SRFBP1	serum response factor binding protein 1(SRFBP1)
SRP19	signal recognition particle 19(SRP19)
SRSF10	serine and arginine rich splicing factor 10(SRSF10)
SSR1	signal sequence receptor subunit 1(SSR1)
SSR3	signal sequence receptor subunit 3(SSR3)
STK17B	serine/threonine kinase 17b(STK17B)
STRBP	spermatid perinuclear RNA binding protein(STRBP)
STX16	syntaxin 16(STX16)
TBC1D4	TBC1 domain family member 4(TBC1D4)
TBX18	T-box 18(TBX18)
TCEB1	transcription elongation factor B subunit 1(TCEB1)
TEAD1	TEA domain transcription factor 1(TEAD1)
TES	testin LIM domain protein(TES)
TIAL1	TIA1 cytotoxic granule associated RNA binding protein like 1(TIAL1)
TLE3	transducin like enhancer of split 3(TLE3)
TLK1	tousled like kinase 1(TLK1)
TM2D3	TM2 domain containing 3(TM2D3)
TMED5	transmembrane p24 trafficking protein 5(TMED5)
TMEM167A	transmembrane protein 167A(TMEM167A)
TMEM183A	transmembrane protein 183A(TMEM183A)
TMEM39A	transmembrane protein 39A(TMEM39A)
TMEM57	transmembrane protein 57(TMEM57)
TNC	tenascin C(TNC)
TNFSF9	tumor necrosis factor superfamily member 9(TNFSF9)
TNS1	tensin 1(TNS1)
TOR1AIP2	torsin 1A interacting protein 2(TOR1AIP2)
TRIM9	tripartite motif containing 9(TRIM9)
TSC22D1	TSC22 domain family member 1(TSC22D1)
TTLL4	tubulin tyrosine ligase like 4(TTLL4)
U2SURP	U2 snRNP associated SURP domain containing(U2SURP)
UBA6	ubiquitin like modifier activating enzyme 6(UBA6)
UBE2E3	ubiquitin conjugating enzyme E2 E3(UBE2E3)
UBE2G1	ubiquitin conjugating enzyme E2 G1(UBE2G1)
UBQLN1	ubiquilin 1(UBQLN1)
UCK2	uridine-cytidine kinase 2(UCK2)
UHRF1BP1L	UHRF1 binding protein 1 like(UHRF1BP1L)
USP48	ubiquitin specific peptidase 48(USP48)
VDR	vitamin D (1,25- dihydroxyvitamin D3) receptor(VDR)
VEGFA	vascular endothelial growth factor A(VEGFA)
VMP1	vacuole membrane protein 1(VMP1)
WNT10B	Wnt family member 10B(WNT10B)
XKR8	XK related 8(XKR8)
XPO5	exportin 5(XPO5)
YARS2	tyrosyl-tRNA synthetase 2(YARS2)
ZBTB5	zinc finger and BTB domain containing 5(ZBTB5)
ZC3H15	zinc finger CCCH-type containing 15(ZC3H15)
ZFAND6	zinc finger AN1-type containing 6(ZFAND6)
ZFR	zinc finger RNA binding protein(ZFR)
ZNF174	zinc finger protein 174(ZNF174)
ZNF275	zinc finger protein 275(ZNF275)
ZNF280C	zinc finger protein 280C(ZNF280C)
ZNF280D	zinc finger protein 280D(ZNF280D)
ZNF322	zinc finger protein 322(ZNF322)

## Sheet: Table S4c
Table S4c. Down-regulated miRNAs target transcription factor
Gene symbol	Gene name
ATF2	activating transcription factor 2(ATF2)
BMI1	BMI1 proto-oncogene, polycomb ring finger(BMI1)
CITED2	Cbp/p300 interacting transactivator with Glu/Asp rich carboxy-terminal domain 2(CITED2)
E2F6	E2F transcription factor 6(E2F6)
ETV4	ETS variant 4(ETV4)
EYA1	EYA transcriptional coactivator and phosphatase 1(EYA1)
EYA3	EYA transcriptional coactivator and phosphatase 3(EYA3)
EYA4	EYA transcriptional coactivator and phosphatase 4(EYA4)
FOXJ3	forkhead box J3(FOXJ3)
FOXN2	forkhead box N2(FOXN2)
FOXP1	forkhead box P1(FOXP1)
HOXA5	homeobox A5(HOXA5)
HOXB2	homeobox B2(HOXB2)
HOXB6	homeobox B6(HOXB6)
ID1	inhibitor of DNA binding 1, HLH protein(ID1)
MTF2	metal response element binding transcription factor 2(MTF2)
NAB1	NGFI-A binding protein 1(NAB1)
NKRF	NFKB repressing factor(NKRF)
NR2C2	nuclear receptor subfamily 2 group C member 2(NR2C2)
PITX2	paired like homeodomain 2(PITX2)
PLAGL2	PLAG1 like zinc finger 2(PLAGL2)
POU2F1	POU class 2 homeobox 1(POU2F1)
RFXANK	regulatory factor X associated ankyrin containing protein(RFXANK)
RNF144A	ring finger protein 144A(RNF144A)
SP4	Sp4 transcription factor(SP4)
TBX18	T-box 18(TBX18)
TEAD1	TEA domain transcription factor 1(TEAD1)
TSC22D1	TSC22 domain family member 1(TSC22D1)
TTLL4	tubulin tyrosine ligase like 4(TTLL4)
VDR	vitamin D (1,25- dihydroxyvitamin D3) receptor(VDR)
ZFAND6	zinc finger AN1-type containing 6(ZFAND6)
ZFR	zinc finger RNA binding protein(ZFR)
ZNF174	zinc finger protein 174(ZNF174)
ZNF275	zinc finger protein 275(ZNF275)

## Sheet: Table S4d
Table S4d. Up-regulated miRNAs target gene from GSE31909
Gene symbol	Gene name
MEF2C	myocyte enhancer factor 2C(MEF2C)
CADM3	cell adhesion molecule 3(CADM3)
PRR16	proline rich 16(PRR16)
DYNC1LI2	dynein cytoplasmic 1 light intermediate chain 2(DYNC1LI2)
ALAD	aminolevulinate dehydratase(ALAD)
PITPNA	phosphatidylinositol transfer protein alpha(PITPNA)
FAM20B	FAM20B, glycosaminoglycan xylosylkinase(FAM20B)
FAM110B	family with sequence similarity 110 member B(FAM110B)
FAM20C	FAM20C, golgi associated secretory pathway kinase(FAM20C)
SIDT2	SID1 transmembrane family member 2(SIDT2)
MXI1	MAX interactor 1, dimerization protein(MXI1)
PRKX	protein kinase, X-linked(PRKX)
ZFP91	ZFP91 zinc finger protein(ZFP91)
ACBD3	acyl-CoA binding domain containing 3(ACBD3)
PGP	phosphoglycolate phosphatase(PGP)
COL4A3BP	collagen type IV alpha 3 binding protein(COL4A3BP)
FOXF2	forkhead box F2(FOXF2)
VPS4B	vacuolar protein sorting 4 homolog B(VPS4B)
VPS4A	vacuolar protein sorting 4 homolog A(VPS4A)
ABCB10	ATP binding cassette subfamily B member 10(ABCB10)
ZNF106	zinc finger protein 106(ZNF106)
STAM	signal transducing adaptor molecule(STAM)
GNG2	G protein subunit gamma 2(GNG2)
PELI3	pellino E3 ubiquitin protein ligase family member 3(PELI3)
ITFG1	integrin alpha FG-GAP repeat containing 1(ITFG1)
KIF13B	kinesin family member 13B(KIF13B)
MATN2	matrilin 2(MATN2)
TYRO3	TYRO3 protein tyrosine kinase(TYRO3)
PTPRM	protein tyrosine phosphatase, receptor type M(PTPRM)
RCOR3	REST corepressor 3(RCOR3)
EFCAB14	EF-hand calcium binding domain 14(EFCAB14)
MECP2	methyl-CpG binding protein 2(MECP2)
SIPA1L2	signal induced proliferation associated 1 like 2(SIPA1L2)
OPTN	optineurin(OPTN)
SKP1	S-phase kinase associated protein 1(SKP1)
MYH9	myosin heavy chain 9(MYH9)
KIAA1522	KIAA1522(KIAA1522)
LHFPL2	lipoma HMGIC fusion partner-like 2(LHFPL2)
PCF11	PCF11 cleavage and polyadenylation factor subunit(PCF11)
DCAF6	DDB1 and CUL4 associated factor 6(DCAF6)
TRAPPC8	trafficking protein particle complex 8(TRAPPC8)
MLLT10	myeloid/lymphoid or mixed-lineage leukemia; translocated to, 10(MLLT10)
BACE1	beta-secretase 1(BACE1)
ROR1	receptor tyrosine kinase like orphan receptor 1(ROR1)
FBXL5	F-box and leucine rich repeat protein 5(FBXL5)
VGLL4	vestigial like family member 4(VGLL4)
TGFB1I1	transforming growth factor beta 1 induced transcript 1(TGFB1I1)
ADAMTS2	ADAM metallopeptidase with thrombospondin type 1 motif 2(ADAMTS2)
SH3GL2	SH3 domain containing GRB2 like 2, endophilin A1(SH3GL2)
TBC1D8B	TBC1 domain family member 8B(TBC1D8B)
TPST2	tyrosylprotein sulfotransferase 2(TPST2)
PALM	paralemmin(PALM)
PPP2R3A	protein phosphatase 2 regulatory subunit B''alpha(PPP2R3A)
ERBB3	erb-b2 receptor tyrosine kinase 3(ERBB3)
ASAP2	ArfGAP with SH3 domain, ankyrin repeat and PH domain 2(ASAP2)
FAM122A	family with sequence similarity 122A(FAM122A)
SORCS1	sortilin related VPS10 domain containing receptor 1(SORCS1)
AKAP11	A-kinase anchoring protein 11(AKAP11)
SEMA5A	semaphorin 5A(SEMA5A)
PPP1R3C	protein phosphatase 1 regulatory subunit 3C(PPP1R3C)
SYPL1	synaptophysin like 1(SYPL1)
SLC29A2	solute carrier family 29 member 2(SLC29A2)
NAA30	N(alpha)-acetyltransferase 30, NatC catalytic subunit(NAA30)
SYBU	syntabulin(SYBU)
IDH1	isocitrate dehydrogenase (NADP(+)) 1, cytosolic(IDH1)
VEZF1	vascular endothelial zinc finger 1(VEZF1)
BCOR	BCL6 corepressor(BCOR)
CDC42EP3	CDC42 effector protein 3(CDC42EP3)
FBXO8	F-box protein 8(FBXO8)
SGIP1	SH3 domain GRB2 like endophilin interacting protein 1(SGIP1)
KLF5	Kruppel like factor 5(KLF5)
GIT1	GIT ArfGAP 1(GIT1)
ZNF398	zinc finger protein 398(ZNF398)
OSBPL5	oxysterol binding protein like 5(OSBPL5)
GDE1	glycerophosphodiester phosphodiesterase 1(GDE1)
ATP11B	ATPase phospholipid transporting 11B (putative)(ATP11B)
NDFIP1	Nedd4 family interacting protein 1(NDFIP1)
CELSR2	cadherin EGF LAG seven-pass G-type receptor 2(CELSR2)
ARFIP1	ADP ribosylation factor interacting protein 1(ARFIP1)
PPA2	pyrophosphatase (inorganic) 2(PPA2)
FNIP1	folliculin interacting protein 1(FNIP1)
FNIP2	folliculin interacting protein 2(FNIP2)
TULP4	tubby like protein 4(TULP4)
ATP2A2	ATPase sarcoplasmic/endoplasmic reticulum Ca2+ transporting 2(ATP2A2)
DMTF1	cyclin D binding myb like transcription factor 1(DMTF1)
CD59	CD59 molecule(CD59)
NSMF	NMDA receptor synaptonuclear signaling and neuronal migration factor(NSMF)
CNIH1	cornichon family AMPA receptor auxiliary protein 1(CNIH1)
IDI1	isopentenyl-diphosphate delta isomerase 1(IDI1)
PXDN	peroxidasin(PXDN)
RAB5B	RAB5B, member RAS oncogene family(RAB5B)
LDLR	low density lipoprotein receptor(LDLR)
TSNAX	translin associated factor X(TSNAX)
SLC16A12	solute carrier family 16 member 12(SLC16A12)
PPARG	peroxisome proliferator activated receptor gamma(PPARG)
CRCP	CGRP receptor component(CRCP)
HELZ	helicase with zinc finger(HELZ)
APCDD1	APC down-regulated 1(APCDD1)
FAM57A	family with sequence similarity 57 member A(FAM57A)
CANX	calnexin(CANX)
MCF2L	MCF.2 cell line derived transforming sequence like(MCF2L)
SENP7	SUMO1/sentrin specific peptidase 7(SENP7)
AUH	AU RNA binding methylglutaconyl-CoA hydratase(AUH)
KCNIP3	potassium voltage-gated channel interacting protein 3(KCNIP3)
ATG2B	autophagy related 2B(ATG2B)
ST6GALNAC6	ST6 N-acetylgalactosaminide alpha-2,6-sialyltransferase 6(ST6GALNAC6)
DIP2A	disco interacting protein 2 homolog A(DIP2A)
WDR37	WD repeat domain 37(WDR37)
ST6GALNAC3	ST6 N-acetylgalactosaminide alpha-2,6-sialyltransferase 3(ST6GALNAC3)
MAP1LC3A	microtubule associated protein 1 light chain 3 alpha(MAP1LC3A)
ANKRD12	ankyrin repeat domain 12(ANKRD12)
USP14	ubiquitin specific peptidase 14(USP14)
GOLGA3	golgin A3(GOLGA3)
USP13	ubiquitin specific peptidase 13 (isopeptidase T-3)(USP13)
STX6	syntaxin 6(STX6)
SRPK2	SRSF protein kinase 2(SRPK2)
RAP2A	RAP2A, member of RAS oncogene family(RAP2A)
SH3PXD2A	SH3 and PX domains 2A(SH3PXD2A)
ADAM10	ADAM metallopeptidase domain 10(ADAM10)
LPGAT1	lysophosphatidylglycerol acyltransferase 1(LPGAT1)
ARHGEF7	Rho guanine nucleotide exchange factor 7(ARHGEF7)
PIK3C2B	phosphatidylinositol-4-phosphate 3-kinase catalytic subunit type 2 beta(PIK3C2B)
FLOT2	flotillin 2(FLOT2)
TTC37	tetratricopeptide repeat domain 37(TTC37)
FAM45A	family with sequence similarity 45 member A(FAM45A)
HERC2	HECT and RLD domain containing E3 ubiquitin protein ligase 2(HERC2)
ARHGEF12	Rho guanine nucleotide exchange factor 12(ARHGEF12)
ZCCHC14	zinc finger CCHC-type containing 14(ZCCHC14)
DNAJC27	DnaJ heat shock protein family (Hsp40) member C27(DNAJC27)
WDR47	WD repeat domain 47(WDR47)
ADO	2-aminoethanethiol dioxygenase(ADO)
RAB11FIP2	RAB11 family interacting protein 2(RAB11FIP2)
ANKRD28	ankyrin repeat domain 28(ANKRD28)
BNIP2	BCL2 interacting protein 2(BNIP2)
MTMR10	myotubularin related protein 10(MTMR10)
CYBRD1	cytochrome b reductase 1(CYBRD1)
GNB5	G protein subunit beta 5(GNB5)
SGCD	sarcoglycan delta(SGCD)
RAB11FIP1	RAB11 family interacting protein 1(RAB11FIP1)
MAP3K12	mitogen-activated protein kinase kinase kinase 12(MAP3K12)
CLOCK	clock circadian regulator(CLOCK)
CHL1	cell adhesion molecule L1 like(CHL1)
MAP3K11	mitogen-activated protein kinase kinase kinase 11(MAP3K11)
SGCB	sarcoglycan beta(SGCB)
MYO5A	myosin VA(MYO5A)
ZMYND11	zinc finger MYND-type containing 11(ZMYND11)
FAM69C	family with sequence similarity 69 member C(FAM69C)
MKNK2	MAP kinase interacting serine/threonine kinase 2(MKNK2)
AASS	aminoadipate-semialdehyde synthase(AASS)
KANSL1L	KAT8 regulatory NSL complex subunit 1 like(KANSL1L)
ABHD3	abhydrolase domain containing 3(ABHD3)
ABI1	abl interactor 1(ABI1)
CLDN11	claudin 11(CLDN11)
KIT	KIT proto-oncogene receptor tyrosine kinase(KIT)
ITM2B	integral membrane protein 2B(ITM2B)
KIAA1147	KIAA1147(KIAA1147)
MYCBP2	MYC binding protein 2, E3 ubiquitin protein ligase(MYCBP2)
FAM46B	family with sequence similarity 46 member B(FAM46B)
STARD13	StAR related lipid transfer domain containing 13(STARD13)
SORBS1	sorbin and SH3 domain containing 1(SORBS1)
SNRK	SNF related kinase(SNRK)
SORBS2	sorbin and SH3 domain containing 2(SORBS2)
BCL2	BCL2, apoptosis regulator(BCL2)
SOS2	SOS Ras/Rho guanine nucleotide exchange factor 2(SOS2)
NPAT	nuclear protein, coactivator of histone transcription(NPAT)
PKD2	polycystin 2, transient receptor potential cation channel(PKD2)
PPP3CB	protein phosphatase 3 catalytic subunit beta(PPP3CB)
CC2D1B	coiled-coil and C2 domain containing 1B(CC2D1B)
ARMCX1	armadillo repeat containing, X-linked 1(ARMCX1)
UGT8	UDP glycosyltransferase 8(UGT8)
GALNT18	polypeptide N-acetylgalactosaminyltransferase 18(GALNT18)
GALNT11	polypeptide N-acetylgalactosaminyltransferase 11(GALNT11)
THBS2	thrombospondin 2(THBS2)
FLRT3	fibronectin leucine rich transmembrane protein 3(FLRT3)
NUCKS1	nuclear casein kinase and cyclin dependent kinase substrate 1(NUCKS1)
PDK4	pyruvate dehydrogenase kinase 4(PDK4)
COL15A1	collagen type XV alpha 1 chain(COL15A1)
TECPR2	tectonin beta-propeller repeat containing 2(TECPR2)
ZNF25	zinc finger protein 25(ZNF25)
PDZRN3	PDZ domain containing ring finger 3(PDZRN3)
HNRNPDL	heterogeneous nuclear ribonucleoprotein D like(HNRNPDL)
KANK4	KN motif and ankyrin repeat domains 4(KANK4)
CAPRIN1	cell cycle associated protein 1(CAPRIN1)
PHF19	PHD finger protein 19(PHF19)
PLSCR4	phospholipid scramblase 4(PLSCR4)
ADCY9	adenylate cyclase 9(ADCY9)
RPS6KA2	ribosomal protein S6 kinase A2(RPS6KA2)
ZNF362	zinc finger protein 362(ZNF362)
BNC2	basonuclin 2(BNC2)
ZBTB4	zinc finger and BTB domain containing 4(ZBTB4)
SECISBP2L	SECIS binding protein 2 like(SECISBP2L)
TMTC2	transmembrane and tetratricopeptide repeat containing 2(TMTC2)
PRSS23	protease, serine 23(PRSS23)
CTNS	cystinosin, lysosomal cystine transporter(CTNS)
DUSP9	dual specificity phosphatase 9(DUSP9)
DUSP8	dual specificity phosphatase 8(DUSP8)
TP53INP2	tumor protein p53 inducible nuclear protein 2(TP53INP2)
CALM2	calmodulin 2(CALM2)
VLDLR	very low density lipoprotein receptor(VLDLR)
CALM1	calmodulin 1(CALM1)
MKRN1	makorin ring finger protein 1(MKRN1)
ENAH	enabled homolog (Drosophila)(ENAH)
TUFT1	tuftelin 1(TUFT1)
RBM3	RNA binding motif (RNP1, RRM) protein 3(RBM3)
GNA12	G protein subunit alpha 12(GNA12)
RBM6	RNA binding motif protein 6(RBM6)
TCEAL7	transcription elongation factor A like 7(TCEAL7)
IL17RD	interleukin 17 receptor D(IL17RD)
RGL1	ral guanine nucleotide dissociation stimulator like 1(RGL1)
CBFB	core-binding factor beta subunit(CBFB)
GHITM	growth hormone inducible transmembrane protein(GHITM)
SLC25A23	solute carrier family 25 member 23(SLC25A23)
ANKRD50	ankyrin repeat domain 50(ANKRD50)
NSG1	neuron specific gene family member 1(NSG1)
TPT1	tumor protein, translationally-controlled 1(TPT1)
ELOVL6	ELOVL fatty acid elongase 6(ELOVL6)
LONRF1	LON peptidase N-terminal domain and ring finger 1(LONRF1)
ITPK1	inositol-tetrakisphosphate 1-kinase(ITPK1)
GABPB2	GA binding protein transcription factor beta subunit 2(GABPB2)
SMIM19	small integral membrane protein 19(SMIM19)
STK24	serine/threonine kinase 24(STK24)
HRK	harakiri, BCL2 interacting protein(HRK)
DDIT4	DNA damage inducible transcript 4(DDIT4)
GNS	glucosamine (N-acetyl)-6-sulfatase(GNS)
RBPMS	RNA binding protein with multiple splicing(RBPMS)
SLC25A34	solute carrier family 25 member 34(SLC25A34)
SMARCE1	SWI/SNF related, matrix associated, actin dependent regulator of chromatin, subfamily e, member 1(SMARCE1)
DTWD2	DTW domain containing 2(DTWD2)
LYST	lysosomal trafficking regulator(LYST)
PI4K2A	phosphatidylinositol 4-kinase type 2 alpha(PI4K2A)
COL1A2	collagen type I alpha 2 chain(COL1A2)
CLIP1	CAP-Gly domain containing linker protein 1(CLIP1)
MFAP2	microfibrillar associated protein 2(MFAP2)
KDSR	3-ketodihydrosphingosine reductase(KDSR)
VAMP2	vesicle associated membrane protein 2(VAMP2)
PDCD6IP	programmed cell death 6 interacting protein(PDCD6IP)
DCUN1D4	defective in cullin neddylation 1 domain containing 4(DCUN1D4)
VPS26A	VPS26, retromer complex component A(VPS26A)
SRI	sorcin(SRI)
FGD1	FYVE, RhoGEF and PH domain containing 1(FGD1)
FAM160B1	family with sequence similarity 160 member B1(FAM160B1)
GLUD1	glutamate dehydrogenase 1(GLUD1)
SNX7	sorting nexin 7(SNX7)
NEDD9	neural precursor cell expressed, developmentally down-regulated 9(NEDD9)
CERS5	ceramide synthase 5(CERS5)
UBE2V2	ubiquitin conjugating enzyme E2 V2(UBE2V2)
CTSA	cathepsin A(CTSA)
SNX3	sorting nexin 3(SNX3)
ATP6V1B2	ATPase H+ transporting V1 subunit B2(ATP6V1B2)
DAZAP2	DAZ associated protein 2(DAZAP2)
CCNG2	cyclin G2(CCNG2)
TIMP3	TIMP metallopeptidase inhibitor 3(TIMP3)
CASD1	CAS1 domain containing 1(CASD1)
CORO2B	coronin 2B(CORO2B)
PRUNE2	prune homolog 2(PRUNE2)
IRAK3	interleukin 1 receptor associated kinase 3(IRAK3)
CORO2A	coronin 2A(CORO2A)
UBE2D3	ubiquitin conjugating enzyme E2 D3(UBE2D3)
AUTS2	autism susceptibility candidate 2(AUTS2)
HECTD4	HECT domain E3 ubiquitin protein ligase 4(HECTD4)
SLC30A9	solute carrier family 30 member 9(SLC30A9)
TBC1D2B	TBC1 domain family member 2B(TBC1D2B)
MSMO1	methylsterol monooxygenase 1(MSMO1)
MYO1C	myosin IC(MYO1C)
NIN	ninein(NIN)
LPP	LIM domain containing preferred translocation partner in lipoma(LPP)
MYO1D	myosin ID(MYO1D)
NR4A2	nuclear receptor subfamily 4 group A member 2(NR4A2)
ENDOD1	endonuclease domain containing 1(ENDOD1)
DENR	density regulated re-initiation and release factor(DENR)
WIPI2	WD repeat domain, phosphoinositide interacting 2(WIPI2)
HERPUD2	HERPUD family member 2(HERPUD2)
KCTD6	potassium channel tetramerization domain containing 6(KCTD6)
ATP7A	ATPase copper transporting alpha(ATP7A)
LAMP1	lysosomal associated membrane protein 1(LAMP1)
LAMP2	lysosomal associated membrane protein 2(LAMP2)
NXN	nucleoredoxin(NXN)
DYRK1B	dual specificity tyrosine phosphorylation regulated kinase 1B(DYRK1B)
HABP4	hyaluronan binding protein 4(HABP4)
PIP4K2A	phosphatidylinositol-5-phosphate 4-kinase type 2 alpha(PIP4K2A)
SLC25A16	solute carrier family 25 member 16(SLC25A16)
IKBKB	inhibitor of kappa light polypeptide gene enhancer in B-cells, kinase beta(IKBKB)
CCNDBP1	cyclin D1 binding protein 1(CCNDBP1)
ABL2	ABL proto-oncogene 2, non-receptor tyrosine kinase(ABL2)
MYLK	myosin light chain kinase(MYLK)
PLEKHA1	pleckstrin homology domain containing A1(PLEKHA1)
E2F1	E2F transcription factor 1(E2F1)
CDK19	cyclin dependent kinase 19(CDK19)
HPS6	HPS6, biogenesis of lysosomal organelles complex 2 subunit 3(HPS6)
ZKSCAN1	zinc finger with KRAB and SCAN domains 1(ZKSCAN1)
GABBR2	gamma-aminobutyric acid type B receptor subunit 2(GABBR2)
ZFYVE21	zinc finger FYVE-type containing 21(ZFYVE21)
FAM109B	family with sequence similarity 109 member B(FAM109B)
ATP8B2	ATPase phospholipid transporting 8B2(ATP8B2)
SNTB2	syntrophin beta 2(SNTB2)
CABLES2	Cdk5 and Abl enzyme substrate 2(CABLES2)
LRRFIP2	LRR binding FLII interacting protein 2(LRRFIP2)
ALX1	ALX homeobox 1(ALX1)
ARL2	ADP ribosylation factor like GTPase 2(ARL2)
METTL4	methyltransferase like 4(METTL4)
RALBP1	ralA binding protein 1(RALBP1)
G3BP2	G3BP stress granule assembly factor 2(G3BP2)
MBNL2	muscleblind like splicing regulator 2(MBNL2)
RB1	RB transcriptional corepressor 1(RB1)
PBK	PDZ binding kinase(PBK)
MID1IP1	MID1 interacting protein 1(MID1IP1)
KIDINS220	kinase D-interacting substrate 220kDa(KIDINS220)
ATP6V1D	ATPase H+ transporting V1 subunit D(ATP6V1D)
M6PR	mannose-6-phosphate receptor, cation dependent(M6PR)
VAT1	vesicle amine transport 1(VAT1)
EML2	echinoderm microtubule associated protein like 2(EML2)
MAGT1	magnesium transporter 1(MAGT1)
BVES	blood vessel epicardial substance(BVES)
ZFYVE26	zinc finger FYVE-type containing 26(ZFYVE26)
SLC35E1	solute carrier family 35 member E1(SLC35E1)
DEF8	differentially expressed in FDCP 8 homolog(DEF8)
CNTN1	contactin 1(CNTN1)
ZADH2	zinc binding alcohol dehydrogenase domain containing 2(ZADH2)
NGFR	nerve growth factor receptor(NGFR)
CHFR	checkpoint with forkhead and ring finger domains(CHFR)
KIAA1191	KIAA1191(KIAA1191)
PMEPA1	prostate transmembrane protein, androgen induced 1(PMEPA1)
GALNT3	polypeptide N-acetylgalactosaminyltransferase 3(GALNT3)
CYP2U1	cytochrome P450 family 2 subfamily U member 1(CYP2U1)
MMGT1	membrane magnesium transporter 1(MMGT1)
RTN4RL1	reticulon 4 receptor like 1(RTN4RL1)
FRYL	FRY like transcription coactivator(FRYL)
USP9X	ubiquitin specific peptidase 9, X-linked(USP9X)
CALD1	caldesmon 1(CALD1)
CDH1	cadherin 1(CDH1)
SPOCK1	SPARC/osteonectin, cwcv and kazal like domains proteoglycan 1(SPOCK1)
GRAMD3	GRAM domain containing 3(GRAMD3)
ESYT2	extended synaptotagmin 2(ESYT2)
FAM13A	family with sequence similarity 13 member A(FAM13A)
ESYT1	extended synaptotagmin 1(ESYT1)
TPM4	tropomyosin 4(TPM4)
TCF7L1	transcription factor 7 like 1(TCF7L1)
ZNF706	zinc finger protein 706(ZNF706)
N4BP1	NEDD4 binding protein 1(N4BP1)
MAP3K3	mitogen-activated protein kinase kinase kinase 3(MAP3K3)
MCMDC2	minichromosome maintenance domain containing 2(MCMDC2)
CCDC126	coiled-coil domain containing 126(CCDC126)
SLC39A6	solute carrier family 39 member 6(SLC39A6)
PAFAH1B1	platelet activating factor acetylhydrolase 1b regulatory subunit 1(PAFAH1B1)
PTS	6-pyruvoyltetrahydropterin synthase(PTS)
VPS39	VPS39, HOPS complex subunit(VPS39)
EHD3	EH domain containing 3(EHD3)
ZC3H12C	zinc finger CCCH-type containing 12C(ZC3H12C)
EHD4	EH domain containing 4(EHD4)
TXNIP	thioredoxin interacting protein(TXNIP)
NACC2	NACC family member 2(NACC2)
KAT2B	lysine acetyltransferase 2B(KAT2B)
UBE4A	ubiquitination factor E4A(UBE4A)
PSAP	prosaposin(PSAP)
CREB1	cAMP responsive element binding protein 1(CREB1)
GRSF1	G-rich RNA sequence binding factor 1(GRSF1)
SMC6	structural maintenance of chromosomes 6(SMC6)
DPYSL2	dihydropyrimidinase like 2(DPYSL2)
UBL3	ubiquitin like 3(UBL3)
XPNPEP1	X-prolyl aminopeptidase 1(XPNPEP1)
TMEM55A	transmembrane protein 55A(TMEM55A)
IRF9	interferon regulatory factor 9(IRF9)
WSB1	WD repeat and SOCS box containing 1(WSB1)
TMEM47	transmembrane protein 47(TMEM47)
SUMF1	sulfatase modifying factor 1(SUMF1)
GDF11	growth differentiation factor 11(GDF11)
DENND4C	DENN domain containing 4C(DENND4C)
IRF4	interferon regulatory factor 4(IRF4)
SLC25A51	solute carrier family 25 member 51(SLC25A51)
F2R	coagulation factor II thrombin receptor(F2R)

## Sheet: Table S4e
Table S4e. Up-regulated miRNAs target transcription factor
Gene symbol	Gene name
ALX1	ALX homeobox 1(ALX1)
BNC2	basonuclin 2(BNC2)
CLOCK	clock circadian regulator(CLOCK)
CREB1	cAMP responsive element binding protein 1(CREB1)
DMTF1	cyclin D binding myb like transcription factor 1(DMTF1)
E2F1	E2F transcription factor 1(E2F1)
FAM20C	FAM20C, golgi associated secretory pathway kinase(FAM20C)
FOXF2	forkhead box F2(FOXF2)
IRF4	interferon regulatory factor 4(IRF4)
IRF9	interferon regulatory factor 9(IRF9)
KCNIP3	potassium voltage-gated channel interacting protein 3(KCNIP3)
KLF5	Kruppel like factor 5(KLF5)
MBNL2	muscleblind like splicing regulator 2(MBNL2)
MECP2	methyl-CpG binding protein 2(MECP2)
MEF2C	myocyte enhancer factor 2C(MEF2C)
MLLT10	myeloid/lymphoid or mixed-lineage leukemia; translocated to, 10(MLLT10)
MXI1	MAX interactor 1, dimerization protein(MXI1)
NR4A2	nuclear receptor subfamily 4 group A member 2(NR4A2)
OPTN	optineurin(OPTN)
PPARG	peroxisome proliferator activated receptor gamma(PPARG)
RB1	RB transcriptional corepressor 1(RB1)
SMARCE1	SWI/SNF related, matrix associated, actin dependent regulator of chromatin, subfamily e, member 1(SMARCE1)
TCF7L1	transcription factor 7 like 1(TCF7L1)
TGFB1I1	transforming growth factor beta 1 induced transcript 1(TGFB1I1)
TULP4	tubby like protein 4(TULP4)
VEZF1	vascular endothelial zinc finger 1(VEZF1)
ZNF106	zinc finger protein 106(ZNF106)
ZFP91	ZFP91 zinc finger protein(ZFP91)
ZKSCAN1	zinc finger with KRAB and SCAN domains 1(ZKSCAN1)
ZMYND11	zinc finger MYND-type containing 11(ZMYND11)
ZNF25	zinc finger protein 25(ZNF25)
ZNF362	zinc finger protein 362(ZNF362)
ZNF706	zinc finger protein 706(ZNF706)
