# Supplementary material for: Micro RNA Transcriptome Profile in Canine Oral Melanoma
Source: Preprints.org preprint supplement (doi:10.20944/preprints201908.0286.v1), 2019-08-27
Supplement: Supplementary file 6 [file Table S5.xlsx]

## Sheet: Table 5a
Table S5a. Centrality measures of the down-miR-TFs network
name	Degree unDir	Betweenness unDir
miR-126	8	624.171
FOXN2	7	468.996
BMI1	5	513.54
MTF2	7	328.14
miR-183	4	493.22
E2F6	5	371.776
ATF2	4	462.038
PLAGL2	5	346.578
NR2C2	5	314.701
miR-141	7	184.99
miR-200a	7	184.99
HOXA5	4	288.246
EYA4	4	287.176
EYA3	4	240.778
miR-26b	3	305.231
miR-429	5	162.008
miR-200C	5	162.008
miR-224	3	217.932
miR-708	3	215.305
miR-203	3	202.492
NAB1	4	141.524
POU2F1	3	183.49
miR-31	3	181.336
TSC22D1	4	135.013
EYA1	4	127.101
miR-29c	3	155.947
CITED2	3	128.519
ID1	2	178.765
let-7a	4	88.0187
let-7b	4	88.0187
let-7c	4	88.0187
miR-452	3	106.91
miR-200b	4	77.8393
miR-205	3	98.6442
FOXJ3	3	62.7651
PITX2	3	55.9429
NKRF	2	81.7107
TBX18	2	71.1223
FOXP1	3	45.4402
SP4	2	58.2015
ZFR	3	38.4204
TEAD1	2	42.4694
miR-143	2	41.7298
miR-101	2	32.5841
ZFAND6	3	3.15253
TTLL4	3	1.5
ZNF275	3	1.5
miR-125a	2	2
HOXB2	1	0
HOXB6	1	0
RFXANK	1	0
VDR	1	0
miR-1271	1	0
ETV4	1	0
miR-152	1	0
miR-378i	1	0
RNF144A	1	0
miR-96	1	0
ZNF174	1	0

## Sheet: Table S5b
Table S5b. Centrality measures of the Up-miR-TFs network
name	Degree unDir	Betweenness unDir
CREB1	12	375.086
CLOCK	11	632.368
miR-20b	11	389.321
miR-106a	10	252.233
PPARG	10	171.499
MECP2	8	139.575
miR-9	7	533.752
RB1	7	213.16
miR-454	6	71.7203
miR-301a	6	60.5057
miR-371	6	153.183
miR-130b	6	60.5057
miR-301b	6	60.5057
MEF2C	6	374.621
BNC2	5	215.945
miR-450b	5	134.309
SMARCE1	5	188.177
MLLT10	4	2.95
FOXF2	4	2.95
miR-21	4	146.355
miR-424	4	72.1434
E2F1	4	35.4374
KLF5	4	135.085
IRF9	4	31.6513
ZFP91	3	15.9999
miR-196a	3	102.652
MBNL2	3	41.6491
ZNF362	3	13.1005
IRF4	3	22.85
NR4A2	3	1.83333
ZNF706	2	96
miR-132	2	4.59091
miR-423	2	2
miR-363	2	96
TULP4	2	188
miR-223	2	188
DMTF1	2	4.45733
MXI1	2	0.770707
ZNF25	2	0.770707
KCNIP3	2	0
TGFB1I1	2	4.12479
TCF7L1	2	16.1618
miR-107	1	0
miR-421	1	0
miR-190a	1	0
ALX1	1	0
VEZF1	1	0
ZNF106	1	0
FAM20C	1	0
ZKSCAN1	1	0
OPTN	1	0
ZMYND11	1	0
miR-450a	1	0
